# Supplementary material for: 220–325GHz All-Photopolymer Bragg Horn Antennas Towards Eco-Friendly Terahertz Applications
Source: Research Square preprint supplement (doi:10.21203/rs.3.rs-6221054/v1), 2025-04-21
Supplement: Supplementary file 1 [file 3553e48a6d0afe565c1d9df2.xlsx]

## Sheet: Sheet1
Frequency	Measured	Frequency	Simulated
220	-25.4218	220	-35.1097
220.131	-25.7354	220.105	-34.702
220.262	-25.2621	220.21	-34.4922
220.394	-28.8779	220.315	-33.9826
220.525	-27.3352	220.42	-32.8772
220.656	-31.5621	220.525	-31.3801
220.787	-40.5058	220.63	-29.887
220.919	-40.7304	220.735	-28.6481
221.05	-38.1107	220.84	-27.7596
221.181	-32.1583	220.945	-27.2426
221.312	-33.7008	221.05	-27.0907
221.444	-26.1684	221.155	-27.2875
221.575	-27.1907	221.26	-27.8099
221.706	-25.9194	221.365	-28.6224
221.838	-23.5738	221.47	-29.6677
221.969	-25.7545	221.575	-30.8565
222.1	-23.3766	221.68	-32.0748
222.231	-23.1619	221.785	-33.2294
222.363	-25.0812	221.89	-34.3148
222.494	-22.8104	221.995	-35.4254
222.625	-23.457	222.1	-36.6595
222.756	-23.8971	222.205	-37.9085
222.887	-22.5451	222.31	-38.5483
223.019	-23.9365	222.415	-37.7741
223.15	-24.1784	222.52	-35.9086
223.281	-22.7834	222.625	-33.8475
223.412	-26.22	222.73	-32.0072
223.544	-24.0222	222.835	-30.4554
223.675	-25.0535	222.94	-29.1537
223.806	-28.7555	223.045	-28.0497
223.938	-26.2176	223.15	-27.1043
224.069	-33.8207	223.255	-26.2975
224.2	-32.2899	223.36	-25.6256
224.331	-32.7604	223.465	-25.095
224.463	-34.0746	223.57	-24.7147
224.594	-31.6569	223.675	-24.4906
224.725	-34.0826	223.78	-24.4217
224.856	-27.3259	223.885	-24.4977
224.988	-34.5743	223.99	-24.6979
225.119	-23.8146	224.095	-24.9927
225.25	-28.2355	224.2	-25.3485
225.381	-23.8711	224.305	-25.7379
225.512	-23.3968	224.41	-26.1515
225.644	-23.6805	224.515	-26.6064
225.775	-22.7678	224.62	-27.146
225.906	-25.8044	224.725	-27.8322
226.037	-20.6972	224.83	-28.7356
226.169	-30.0883	224.935	-29.9287
226.3	-21.2624	225.04	-31.4749
226.431	-25.9201	225.145	-33.3853
226.562	-23.6025	225.25	-35.4404
226.694	-23.9215	225.355	-36.7787
226.825	-28.4121	225.46	-36.3364
226.956	-25.1162	225.565	-34.6614
227.088	-25.3913	225.67	-32.8305
227.219	-27.4957	225.775	-31.221
227.35	-27.686	225.88	-29.8542
227.481	-29.3421	225.985	-28.6767
227.613	-35.7836	226.09	-27.6424
227.744	-32.5483	226.195	-26.7275
227.875	-32.7736	226.3	-25.9265
228.006	-43.6346	226.405	-25.2435
228.137	-36.9922	226.51	-24.6848
228.269	-33.7309	226.615	-24.2532
228.4	-35.9048	226.72	-23.9472
228.531	-37.5586	226.825	-23.76
228.662	-27.8825	226.93	-23.6815
228.794	-34.0617	227.035	-23.6995
228.925	-28.7874	227.14	-23.8028
229.056	-25.2663	227.245	-23.9827
229.188	-30.3193	227.35	-24.2358
229.319	-24.4044	227.455	-24.5646
229.45	-22.8345	227.56	-24.9773
229.581	-25.5162	227.665	-25.4868
229.713	-21.8454	227.77	-26.1085
229.844	-23.4104	227.875	-26.8575
229.975	-23.6938	227.98	-27.7441
230.106	-22.9603	228.085	-28.766
230.238	-25.2237	228.19	-29.8916
230.369	-24.4359	228.295	-31.0289
230.5	-22.7418	228.4	-31.9896
230.631	-27.0895	228.505	-32.5081
230.762	-26.2571	228.61	-32.4075
230.894	-26.487	228.715	-31.7683
231.025	-30.495	228.82	-30.8339
231.156	-28.8718	228.925	-29.8103
231.287	-28.8391	229.03	-28.8042
231.419	-35.2391	229.135	-27.8538
231.55	-30.5522	229.24	-26.9681
231.681	-30.8146	229.345	-26.1494
231.812	-44.4922	229.45	-25.4033
231.944	-32.4596	229.555	-24.7412
232.075	-31.5536	229.66	-24.1776
232.206	-38.0013	229.765	-23.7278
232.338	-31.2464	229.87	-23.4051
232.469	-28.1028	229.975	-23.2188
232.6	-33.4097	230.08	-23.174
232.731	-27.3039	230.185	-23.2706
232.863	-27.6053	230.29	-23.5041
232.994	-28.727	230.395	-23.8658
233.125	-25.0242	230.5	-24.3441
233.256	-26.6577	230.605	-24.9281
233.387	-28.2254	230.71	-25.6109
233.519	-25.1846	230.815	-26.3959
233.65	-27.4188	230.92	-27.302
233.781	-28.3986	231.025	-28.3673
233.912	-24.4146	231.13	-29.652
234.044	-28.3337	231.235	-31.2399
234.175	-24.7908	231.34	-33.236
234.306	-23.6645	231.445	-35.7229
234.438	-27.9499	231.55	-38.4467
234.569	-23.6234	231.655	-39.7673
234.7	-24.4994	231.76	-38.1956
234.831	-27.6175	231.865	-35.6904
234.963	-24.0347	231.97	-33.5169
235.094	-26.3923	232.075	-31.7934
235.225	-28.3098	232.18	-30.424
235.356	-26.7411	232.285	-29.3173
235.488	-29.6639	232.39	-28.4129
235.619	-31.0175	232.495	-27.6776
235.75	-27.3727	232.6	-27.0976
235.881	-28.4131	232.705	-26.6704
236.012	-30.6419	232.81	-26.3982
236.144	-25.395	232.915	-26.2833
236.275	-27.569	233.02	-26.3256
236.406	-28.0869	233.125	-26.5213
236.537	-24.6156	233.23	-26.8634
236.669	-28.3744	233.335	-27.3446
236.8	-26.5144	233.44	-27.961
236.931	-24.4491	233.545	-28.7184
237.062	-27.7658	233.65	-29.6397
237.194	-25.9159	233.755	-30.773
237.325	-24.8106	233.86	-32.2002
237.456	-26.7784	233.965	-34.0508
237.588	-25.2954	234.07	-36.5211
237.719	-23.5737	234.175	-39.8276
237.85	-25.3235	234.28	-43.2237
237.981	-23.1768	234.385	-42.4511
238.113	-22.4326	234.49	-38.9654
238.244	-25.8208	234.595	-36.0892
238.375	-21.9184	234.7	-33.9736
238.506	-24.3745	234.805	-32.3707
238.637	-26.3636	234.91	-31.0907
238.769	-22.9829	235.015	-30.0081
238.9	-29.0859	235.12	-29.0506
239.031	-25.9699	235.225	-28.1888
239.162	-26.7978	235.33	-27.4245
239.294	-32.1291	235.435	-26.7749
239.425	-29.9586	235.54	-26.2592
239.556	-27.3753	235.645	-25.8897
239.688	-35.6991	235.75	-25.6663
239.819	-30.3374	235.855	-25.575
239.95	-29.6294	235.96	-25.5873
240.081	-38.7063	236.065	-25.6627
240.213	-31.1308	236.17	-25.7568
240.344	-31.6817	236.275	-25.8353
240.475	-44.0867	236.38	-25.8887
240.606	-31.6948	236.485	-25.9393
240.738	-28.1997	236.59	-26.0343
240.869	-33.8876	236.695	-26.2333
241	-26.7031	236.8	-26.5958
241.131	-26.5678	236.905	-27.1772
241.262	-29.3668	237.01	-28.0301
241.394	-24.4515	237.115	-29.2108
241.525	-25.0824	237.22	-30.7891
241.656	-25.5021	237.325	-32.8671
241.787	-23.8067	237.43	-35.6176
241.919	-25.4618	237.535	-39.3802
242.05	-26.0049	237.64	-44.8898
242.181	-23.9936	237.745	-51.0655
242.312	-25.8093	237.85	-46.7348
242.444	-24.6487	237.955	-42.4834
242.575	-23.159	238.06	-39.7914
242.706	-26.6388	238.165	-37.8258
242.838	-24.1756	238.27	-36.225
242.969	-24.382	238.375	-34.8593
243.1	-27.4187	238.48	-33.6999
243.231	-24.397	238.585	-32.7501
243.363	-27.1121	238.69	-32.0138
243.494	-28.8838	238.795	-31.4857
243.625	-28.1051	238.9	-31.1508
243.756	-34.84	239.005	-30.9865
243.887	-35.3618	239.11	-30.9661
244.019	-34.5402	239.215	-31.0629
244.15	-41.2275	239.32	-31.255
244.281	-37.9269	239.425	-31.5297
244.412	-35.3557	239.53	-31.8863
244.544	-31.0683	239.635	-32.3357
244.675	-40.3268	239.74	-32.8963
244.806	-29.7687	239.845	-33.5897
244.938	-32.5118	239.95	-34.4351
245.069	-31.546	240.055	-35.4453
245.2	-27.1283	240.16	-36.6224
245.331	-31.9227	240.265	-37.9526
245.463	-27.3435	240.37	-39.3973
245.594	-26.464	240.475	-40.875
245.725	-28.501	240.58	-42.2297
245.856	-25.3308	240.685	-43.2084
245.988	-25.69	240.79	-43.5402
246.119	-25.2359	240.895	-43.1611
246.25	-22.9997	241	-42.2992
246.381	-24.0407	241.105	-41.2659
246.512	-23.8327	241.21	-40.2781
246.644	-21.9795	241.315	-39.4449
246.775	-24.9521	241.42	-38.8078
246.906	-23.1362	241.525	-38.3726
247.037	-22.7847	241.63	-38.1263
247.169	-25.0972	241.735	-38.045
247.3	-22.8723	241.84	-38.1001
247.431	-25.9063	241.945	-38.2631
247.562	-26.9571	242.05	-38.5116
247.694	-26.2344	242.155	-38.8346
247.825	-29.0774	242.26	-39.2339
247.956	-30.1768	242.365	-39.7225
248.088	-28.7468	242.47	-40.3176
248.219	-29.5046	242.575	-41.0323
248.35	-33.4617	242.68	-41.8647
248.481	-28.3294	242.785	-42.7859
248.613	-28.833	242.89	-43.7237
248.744	-32.957	242.995	-44.5497
248.875	-27.6063	243.1	-45.0939
249.006	-26.5651	243.205	-45.2156
249.137	-28.5253	243.31	-44.8957
249.269	-23.2563	243.415	-44.2446
249.4	-23.8323	243.52	-43.4177
249.531	-23.6056	243.625	-42.5429
249.662	-21.4431	243.73	-41.7017
249.794	-23.5877	243.835	-40.9373
249.925	-22.5848	243.94	-40.2673
250.056	-21.2668	244.045	-39.6919
250.188	-22.9463	244.15	-39.2007
250.319	-21.9915	244.255	-38.7789
250.45	-21.963	244.36	-38.4114
250.581	-24.6011	244.465	-38.0877
250.713	-22.4491	244.57	-37.8023
250.844	-24.1096	244.675	-37.5542
250.975	-25.9368	244.78	-37.3437
251.106	-23.0392	244.885	-37.1699
251.238	-26.3705	244.99	-37.0304
251.369	-25.4001	245.095	-36.924
251.5	-24.0586	245.2	-36.8557
251.631	-28.4894	245.305	-36.8414
251.762	-24.9979	245.41	-36.9101
251.894	-27.0741	245.515	-37.103
252.025	-30.6151	245.62	-37.4702
252.156	-27.7505	245.725	-38.0684
252.287	-31.9671	245.83	-38.9593
252.419	-38.4226	245.935	-40.2091
252.55	-32.3697	246.04	-41.8799
252.681	-31.4534	246.145	-43.9825
252.812	-34.8024	246.25	-46.2861
252.944	-28.6931	246.355	-47.9217
253.075	-25.1706	246.46	-47.954
253.206	-28.4309	246.565	-47.0618
253.338	-23.7102	246.67	-46.3023
253.469	-23.355	246.775	-45.9993
253.6	-25.2609	246.88	-45.9812
253.731	-21.921	246.985	-45.6879
253.863	-23.26	247.09	-44.5146
253.994	-22.9854	247.195	-42.5884
254.125	-21.4214	247.3	-40.5185
254.256	-22.2054	247.405	-38.6886
254.387	-22.5852	247.51	-37.2163
254.519	-21.3027	247.615	-36.1058
254.65	-23.0079	247.72	-35.3268
254.781	-22.6382	247.825	-34.8399
254.912	-21.7535	247.93	-34.6035
255.044	-25.0578	248.035	-34.5749
255.175	-22.957	248.14	-34.7114
255.306	-24.0298	248.245	-34.975
255.438	-27.077	248.35	-35.3406
255.569	-24.6691	248.455	-35.8059
255.7	-30.28	248.56	-36.3987
255.831	-29.9057	248.665	-37.1807
255.963	-30.8846	248.77	-38.2507
256.094	-45.8938	248.875	-39.7607
256.225	-39.159	248.98	-41.9746
256.356	-34.6674	249.085	-45.4804
256.488	-37.4658	249.19	-52.3527
256.619	-46.5519	249.295	-61.6168
256.75	-32.2344	249.4	-47.9798
256.881	-31.2906	249.505	-42.7838
257.012	-33.8019	249.61	-39.5575
257.144	-28.0723	249.715	-37.2326
257.275	-30.4814	249.82	-35.4271
257.406	-30.2202	249.925	-33.9625
257.538	-26.1939	250.03	-32.7461
257.669	-30.4967	250.135	-31.7287
257.8	-27.1954	250.24	-30.884
257.931	-25.4291	250.345	-30.1981
258.062	-28.2135	250.45	-29.6619
258.194	-24.8133	250.555	-29.2676
258.325	-26.0255	250.66	-29.0066
258.456	-25.8724	250.765	-28.8686
258.587	-23.6342	250.87	-28.8429
258.719	-25.0989	250.975	-28.9192
258.85	-24.5769	251.08	-29.0905
258.981	-22.94	251.185	-29.3558
259.113	-25.4094	251.29	-29.7218
259.244	-24.2138	251.395	-30.205
259.375	-23.4068	251.5	-30.8323
259.506	-27.059	251.605	-31.6427
259.637	-23.6095	251.71	-32.6903
259.769	-26.0282	251.815	-34.0546
259.9	-27.065	251.92	-35.8642
260.031	-25.6141	252.025	-38.3615
260.163	-30.6221	252.13	-42.1187
260.294	-28.1027	252.235	-49.2082
260.425	-27.4783	252.34	-58.4891
260.556	-31.9507	252.445	-45.0411
260.688	-29.9141	252.55	-39.9204
260.819	-32.0364	252.655	-36.7385
260.95	-42.2996	252.76	-34.4475
261.081	-35.1763	252.865	-32.681
261.212	-29.8909	252.97	-31.2717
261.344	-33.8653	253.075	-30.1314
261.475	-31.1672	253.18	-29.2085
261.606	-25.8349	253.285	-28.4703
261.738	-29.0617	253.39	-27.8936
261.869	-24.9137	253.495	-27.4604
262	-23.4133	253.6	-27.1563
262.131	-25.4534	253.705	-26.9699
262.262	-21.9238	253.81	-26.8926
262.394	-23.6427	253.915	-26.9204
262.525	-23.8408	254.02	-27.0535
262.656	-22.3058	254.125	-27.298
262.788	-23.5499	254.23	-27.6652
262.919	-23.244	254.335	-28.173
263.05	-22.3601	254.44	-28.8457
263.181	-23.6447	254.545	-29.7168
263.312	-23.7567	254.65	-30.8341
263.444	-22.1378	254.755	-32.271
263.575	-24.1626	254.86	-34.1525
263.706	-23.1756	254.965	-36.7234
263.837	-23.0646	255.07	-40.5686
263.969	-26.0267	255.175	-47.7083
264.1	-23.7525	255.28	-52.8427
264.231	-27.0922	255.385	-42.5727
264.363	-28.3967	255.49	-37.7424
264.494	-26.2389	255.595	-34.654
264.625	-31.9934	255.7	-32.4127
264.756	-31.2896	255.805	-30.6859
264.887	-32.5645	255.91	-29.3156
265.019	-44.8272	256.015	-28.2153
265.15	-41.4924	256.12	-27.3318
265.281	-39.3405	256.225	-26.6293
265.413	-35.1148	256.33	-26.0819
265.544	-47.438	256.435	-25.6699
265.675	-30.3249	256.54	-25.3784
265.806	-31.0831	256.645	-25.1969
265.938	-32.6448	256.75	-25.1193
266.069	-26.4272	256.855	-25.1445
266.2	-30.5821	256.96	-25.2757
266.331	-26.4603	257.065	-25.5211
266.462	-25.343	257.17	-25.8927
266.594	-28.3164	257.275	-26.4075
266.725	-23.9742	257.38	-27.0872
266.856	-24.9535	257.485	-27.9611
266.988	-25.1335	257.59	-29.0709
267.119	-23.0757	257.695	-30.4802
267.25	-24.2668	257.8	-32.2959
267.381	-23.9491	257.905	-34.7163
267.512	-22.4162	258.01	-38.1576
267.644	-24.342	258.115	-43.5061
267.775	-23.2325	258.22	-47.168
267.906	-23.1703	258.325	-40.9566
268.038	-27.0279	258.43	-36.4119
268.169	-24.4703	258.535	-33.3629
268.3	-27.5152	258.64	-31.1336
268.431	-31.3342	258.745	-29.419
268.562	-27.8366	258.85	-28.0663
268.694	-33.1073	258.955	-26.9889
268.825	-32.8241	259.06	-26.1333
268.956	-30.7903	259.165	-25.4631
269.087	-37.2631	259.27	-24.9521
269.219	-36.1839	259.375	-24.5803
269.35	-35.2248	259.48	-24.3318
269.481	-38.6223	259.585	-24.1949
269.613	-45.59	259.69	-24.1611
269.744	-40.6096	259.795	-24.2256
269.875	-33.676	259.9	-24.3876
270.006	-37.8819	260.005	-24.6501
270.137	-31.2721	260.11	-25.021
270.269	-30.9207	260.215	-25.5127
270.4	-31.7706	260.32	-26.144
270.531	-26.8021	260.425	-26.9415
270.663	-31.4553	260.53	-27.9443
270.794	-27.9654	260.635	-29.2109
270.925	-26.6909	260.74	-30.8362
271.056	-31.4005	260.845	-32.9875
271.188	-27.6913	260.95	-36.007
271.319	-28.5227	261.055	-40.7663
271.45	-30.3964	261.16	-49.5567
271.581	-27.5385	261.265	-44.4634
271.712	-28.7463	261.37	-38.0973
271.844	-29.811	261.475	-34.4345
271.975	-25.5973	261.58	-31.9451
272.106	-28.5944	261.685	-30.1032
272.238	-26.4749	261.79	-28.6734
272.369	-25.4043	261.895	-27.5311
272.5	-28.4329	262	-26.6042
272.631	-24.0239	262.105	-25.8495
272.762	-26.5344	262.21	-25.242
272.894	-25.8606	262.315	-24.769
273.025	-23.9453	262.42	-24.425
273.156	-28.4468	262.525	-24.2095
273.288	-25.3291	262.63	-24.1241
273.419	-27.0465	262.735	-24.1714
273.55	-29.5527	262.84	-24.3536
273.681	-27.5182	262.945	-24.6727
273.812	-31.554	263.05	-25.1314
273.944	-33.5151	263.155	-25.7355
274.075	-32.6914	263.26	-26.4973
274.206	-47.4659	263.365	-27.4426
274.337	-34.9294	263.47	-28.6197
274.469	-47.568	263.575	-30.1169
274.6	-31.4405	263.68	-32.0967
274.731	-37.3337	263.785	-34.8878
274.863	-32.3389	263.89	-39.3057
274.994	-27.5624	263.995	-47.9611
275.125	-32.6964	264.1	-44.6495
275.256	-26.6436	264.205	-37.6074
275.387	-26.0915	264.31	-33.7823
275.519	-26.8799	264.415	-31.316
275.65	-23.7452	264.52	-29.6181
275.781	-23.8943	264.625	-28.4301
275.913	-23.3719	264.73	-27.6076
276.044	-21.3758	264.835	-27.0515
276.175	-22.7272	264.94	-26.6806
276.306	-21.8848	265.045	-26.4227
276.438	-21.1639	265.15	-26.217
276.569	-24.3071	265.255	-26.0228
276.7	-21.5593	265.36	-25.8283
276.831	-23.4931	265.465	-25.6505
276.962	-24.6698	265.57	-25.5265
277.094	-22.2609	265.675	-25.4998
277.225	-26.7971	265.78	-25.6106
277.356	-24.3545	265.885	-25.8909
277.488	-25.9755	265.99	-26.3633
277.619	-30.9772	266.095	-27.0421
277.75	-26.4701	266.2	-27.9321
277.881	-29.8468	266.305	-29.0268
278.012	-31.8605	266.41	-30.3006
278.144	-27.7393	266.515	-31.6901
278.275	-36.8789	266.62	-33.0549
278.406	-30.484	266.725	-34.1228
278.538	-31.2716	266.83	-34.5206
278.669	-36.7037	266.935	-34.0479
278.8	-29.2392	267.04	-32.9096
278.931	-48.5939	267.145	-31.486
279.062	-27.2017	267.25	-30.052
279.194	-32.5693	267.355	-28.7435
279.325	-28.5185	267.46	-27.6142
279.456	-26.1454	267.565	-26.6787
279.587	-30.5432	267.67	-25.9323
279.719	-24.869	267.775	-25.3611
279.85	-26.4984	267.88	-24.946
279.981	-26.262	267.985	-24.6654
280.113	-22.4549	268.09	-24.4982
280.244	-25.4545	268.195	-24.4264
280.375	-23.8272	268.3	-24.4382
280.506	-21.9006	268.405	-24.5298
280.637	-26.2715	268.51	-24.7057
280.769	-22.4215	268.615	-24.9765
280.9	-23.33	268.72	-25.3551
281.031	-25.9522	268.825	-25.8509
281.163	-21.3978	268.93	-26.4635
281.294	-24.9996	269.035	-27.1738
281.425	-23.2063	269.14	-27.9341
281.556	-21.9828	269.245	-28.662
281.688	-26.8698	269.35	-29.2519
281.819	-23.0879	269.455	-29.6143
281.95	-24.0336	269.56	-29.7269
282.081	-27.3116	269.665	-29.6434
282.212	-23.5739	269.77	-29.449
282.344	-26.7162	269.875	-29.2098
282.475	-28.4661	269.98	-28.9523
282.606	-25.0211	270.085	-28.6699
282.738	-35.3927	270.19	-28.3415
282.869	-29.4734	270.295	-27.9532
283	-29.3986	270.4	-27.5105
283.131	-35.9549	270.505	-27.0383
283.262	-33.1539	270.61	-26.5707
283.394	-31.4702	270.715	-26.1396
283.525	-30.4314	270.82	-25.7679
283.656	-42.9587	270.925	-25.4671
283.788	-27.3881	271.03	-25.2396
283.919	-30.0945	271.135	-25.0815
284.05	-32.0969	271.24	-24.9859
284.181	-25.4509	271.345	-24.9451
284.312	-27.9175	271.45	-24.9533
284.444	-27.6682	271.555	-25.006
284.575	-22.9279	271.66	-25.1
284.706	-26.0308	271.765	-25.2321
284.837	-24.137	271.87	-25.3974
284.969	-21.9763	271.975	-25.5894
285.1	-26.9834	272.08	-25.7998
285.231	-21.8633	272.185	-26.0203
285.363	-23.3322	272.29	-26.2446
285.494	-25.5557	272.395	-26.4697
285.625	-21.3235	272.5	-26.6946
285.756	-25.6091	272.605	-26.9184
285.887	-24.9878	272.71	-27.1356
286.019	-23.5682	272.815	-27.3329
286.15	-27.9685	272.92	-27.489
286.281	-25.9759	273.025	-27.5797
286.413	-26.2913	273.13	-27.5879
286.544	-30.7706	273.235	-27.5144
286.675	-24.8711	273.34	-27.3826
286.806	-27.9386	273.445	-27.2331
286.938	-31.2965	273.55	-27.1123
287.069	-24.4287	273.655	-27.0628
287.2	-33.838	273.76	-27.117
287.331	-26.7345	273.865	-27.2941
287.462	-26.6386	273.97	-27.5994
287.594	-35.3575	274.075	-28.0209
287.725	-25.6117	274.18	-28.5261
287.856	-34.1056	274.285	-29.0564
287.988	-30.1819	274.39	-29.5278
288.119	-26.9163	274.495	-29.846
288.25	-38.8105	274.6	-29.9403
288.381	-34.9172	274.705	-29.7977
288.512	-46.8802	274.81	-29.4638
288.644	-27.3488	274.915	-29.0116
288.775	-29.6523	275.02	-28.5077
288.906	-28.4112	275.125	-27.998
289.038	-25.2422	275.23	-27.5096
289.169	-27.5897	275.335	-27.0569
289.3	-21.8173	275.44	-26.6485
289.431	-23.6844	275.545	-26.2906
289.562	-24.4529	275.65	-25.9891
289.694	-19.8896	275.755	-25.7494
289.825	-24.6803	275.86	-25.5769
289.956	-24.056	275.965	-25.476
290.087	-20.6097	276.07	-25.4508
290.219	-24.393	276.175	-25.5048
290.35	-23.0279	276.28	-25.6409
290.481	-20.7306	276.385	-25.8611
290.613	-23.1531	276.49	-26.1654
290.744	-20.8963	276.595	-26.5496
290.875	-22.4356	276.7	-27.0017
291.006	-25.9099	276.805	-27.4965
291.137	-21.4355	276.91	-27.9897
291.269	-21.0567	277.015	-28.4139
291.4	-23.5494	277.12	-28.6864
291.531	-26.6925	277.225	-28.7336
291.663	-28.0257	277.33	-28.5263
291.794	-27.5251	277.435	-28.095
291.925	-29.2611	277.54	-27.5113
292.056	-51.6001	277.645	-26.8533
292.188	-31.803	277.75	-26.1836
292.319	-35.6367	277.855	-25.5435
292.45	-31.1707	277.96	-24.9577
292.581	-45.9006	278.065	-24.4398
292.712	-32.3696	278.17	-23.9973
292.844	-24.3142	278.275	-23.6341
292.975	-37.7432	278.38	-23.3527
293.106	-29.7438	278.485	-23.1542
293.238	-27.2791	278.59	-23.0395
293.369	-27.6971	278.695	-23.0088
293.5	-23.4254	278.8	-23.0624
293.631	-29.4435	278.905	-23.2011
293.762	-23.2586	279.01	-23.4264
293.894	-23.7639	279.115	-23.7413
294.025	-31.7117	279.22	-24.1505
294.156	-23.8416	279.325	-24.6604
294.288	-26.2384	279.43	-25.2781
294.419	-25.7903	279.535	-26.0101
294.55	-23.3413	279.64	-26.8571
294.681	-28.0193	279.745	-27.8052
294.812	-24.6498	279.85	-28.8065
294.944	-24.4637	279.955	-29.7482
295.075	-25.6002	280.06	-30.4291
295.206	-23.6573	280.165	-30.6141
295.337	-29.1792	280.27	-30.2072
295.469	-31.1176	280.375	-29.3474
295.6	-24.2338	280.48	-28.2752
295.731	-31.0953	280.585	-27.1763
295.863	-27.5046	280.69	-26.1503
295.994	-25.6959	280.795	-25.2395
296.125	-25.4681	280.9	-24.4575
296.256	-25.3177	281.005	-23.805
296.387	-26.3051	281.11	-23.278
296.519	-21.9783	281.215	-22.8706
296.65	-24.2285	281.32	-22.5772
296.781	-25.445	281.425	-22.3929
296.913	-29.9055	281.53	-22.3141
297.044	-21.9818	281.635	-22.3391
297.175	-26.2344	281.74	-22.4687
297.306	-29.201	281.845	-22.7064
297.438	-45.4728	281.95	-23.0592
297.569	-32.815	282.055	-23.5376
297.7	-36.6064	282.16	-24.1567
297.831	-28.4051	282.265	-24.9366
297.962	-26.9212	282.37	-25.904
298.094	-24.2261	282.475	-27.0942
298.225	-25.8671	282.58	-28.552
298.356	-25.8518	282.685	-30.3249
298.488	-28.1942	282.79	-32.4141
298.619	-23.0887	282.895	-34.5522
298.75	-25.4733	283	-35.6901
298.881	-24.8856	283.105	-34.7486
299.012	-20.8915	283.21	-32.6476
299.144	-24.1635	283.315	-30.5291
299.275	-23.3897	283.42	-28.7184
299.406	-18.9407	283.525	-27.2278
299.538	-24.5979	283.63	-26.0117
299.669	-23.6595	283.735	-25.025
299.8	-22.3124	283.84	-24.2315
299.931	-26.2435	283.945	-23.6035
300.062	-21.4154	284.05	-23.1196
300.194	-24.1083	284.155	-22.7638
300.325	-22.7384	284.26	-22.5249
300.456	-25.0233	284.365	-22.3969
300.587	-25.2704	284.47	-22.3786
300.719	-25.5497	284.575	-22.4737
300.85	-26.4563	284.68	-22.6905
300.981	-26.9817	284.785	-23.0407
301.113	-28.3494	284.89	-23.5386
301.244	-29.0918	284.995	-24.2005
301.375	-32.2177	285.1	-25.0437
301.506	-29.2319	285.205	-26.0866
301.637	-36.8004	285.31	-27.3491
301.769	-29.9901	285.415	-28.8537
301.9	-31.6278	285.52	-30.6239
302.031	-34.5953	285.625	-32.6653
302.163	-29.5005	285.73	-34.8632
302.294	-34.9958	285.835	-36.6183
302.425	-31.0349	285.94	-36.6487
302.556	-33.4891	286.045	-34.8318
302.688	-29.8188	286.15	-32.4707
302.819	-30.9701	286.255	-30.2802
302.95	-32.4331	286.36	-28.4123
303.081	-29.2418	286.465	-26.863
303.212	-26.2626	286.57	-25.6002
303.344	-27.8684	286.675	-24.5911
303.475	-27.6455	286.78	-23.806
303.606	-26.4069	286.885	-23.2175
303.738	-22.4253	286.99	-22.8002
303.869	-21.1171	287.095	-22.5308
304	-23.9174	287.2	-22.3893
304.131	-24.5144	287.305	-22.3606
304.262	-23.9289	287.41	-22.4372
304.394	-21.4356	287.515	-22.6204
304.525	-21.2621	287.62	-22.9215
304.656	-21.2568	287.725	-23.3614
304.788	-21.2458	287.83	-23.9707
304.919	-22.2232	287.935	-24.7905
305.05	-21.8293	288.04	-25.8767
305.181	-22.0421	288.145	-27.3111
305.312	-21.6001	288.25	-29.2288
305.444	-21.759	288.355	-31.8892
305.575	-21.6499	288.46	-35.9036
305.706	-22.4442	288.565	-43.1204
305.837	-25.7503	288.67	-44.6613
305.969	-24.3692	288.775	-36.725
306.1	-29.2166	288.88	-32.4053
306.231	-28.2052	288.985	-29.5687
306.363	-30.0338	289.09	-27.5017
306.494	-30.4339	289.195	-25.9169
306.625	-36.4457	289.3	-24.6744
306.756	-36.8061	289.405	-23.6975
306.887	-37.7173	289.51	-22.9389
307.019	-32.4293	289.615	-22.366
307.15	-33.7484	289.72	-21.9533
307.281	-28.4269	289.825	-21.6788
307.413	-26.9248	289.93	-21.5235
307.544	-27.0655	290.035	-21.472
307.675	-26.2662	290.14	-21.5142
307.806	-26.2503	290.245	-21.6474
307.938	-24.6536	290.35	-21.8775
308.069	-25.7327	290.455	-22.2193
308.2	-24.5914	290.56	-22.6955
308.331	-23.9227	290.665	-23.336
308.462	-24.0189	290.77	-24.1781
308.594	-22.1495	290.875	-25.2684
308.725	-23.3681	290.98	-26.6686
308.856	-21.8729	291.085	-28.4675
308.988	-22.6756	291.19	-30.7964
309.119	-21.4693	291.295	-33.8089
309.25	-22.2268	291.4	-37.1885
309.381	-22.7697	291.505	-37.9443
309.512	-22.5035	291.61	-34.9672
309.644	-23.3181	291.715	-31.8366
309.775	-22.1943	291.82	-29.3668
309.906	-22.6028	291.925	-27.4335
310.038	-22.006	292.03	-25.894
310.169	-22.0945	292.135	-24.6572
310.3	-21.3178	292.24	-23.6664
310.431	-22.3812	292.345	-22.8837
310.562	-22.5056	292.45	-22.2812
310.694	-22.9758	292.555	-21.8351
310.825	-23.0565	292.66	-21.5245
310.956	-22.7731	292.765	-21.3308
311.087	-24.5323	292.87	-21.2392
311.219	-22.8789	292.975	-21.2404
311.35	-26.2084	293.08	-21.3318
311.481	-26.5492	293.185	-21.5188
311.613	-26.5644	293.29	-21.8132
311.744	-29.8162	293.395	-22.2322
311.875	-28.3916	293.5	-22.7957
312.006	-33.2552	293.605	-23.5246
312.137	-29.4182	293.71	-24.4393
312.269	-29.9244	293.815	-25.5579
312.4	-27.4007	293.92	-26.8921
312.531	-27.56	294.025	-28.4338
312.663	-25.4592	294.13	-30.1117
312.794	-25.1123	294.235	-31.6766
312.925	-23.3681	294.34	-32.5647
313.056	-24.0755	294.445	-32.2281
313.188	-21.9882	294.55	-30.8916
313.319	-21.1214	294.655	-29.2101
313.45	-21.8075	294.76	-27.5843
313.581	-20.7885	294.865	-26.1544
313.712	-22.3474	294.97	-24.9513
313.844	-21.208	295.075	-23.97
313.975	-21.2565	295.18	-23.1944
314.106	-21.6714	295.285	-22.605
314.238	-20.9525	295.39	-22.1807
314.369	-20.9409	295.495	-21.9006
314.5	-21.3061	295.6	-21.7455
314.631	-21.3969	295.705	-21.7004
314.762	-21.4958	295.81	-21.7563
314.894	-22.5406	295.915	-21.9118
315.025	-22.2377	296.02	-22.1732
315.156	-23.5031	296.125	-22.5536
315.288	-22.2997	296.23	-23.0692
315.419	-23.153	296.335	-23.7371
315.55	-24.3284	296.44	-24.5715
315.681	-23.1319	296.545	-25.5799
315.812	-27.3816	296.65	-26.7577
315.944	-25.4273	296.755	-28.079
316.075	-29.041	296.86	-29.4766
316.206	-28.5374	296.965	-30.8068
316.337	-29.2987	297.07	-31.808
316.469	-36.7589	297.175	-32.15
316.6	-31.2401	297.28	-31.6815
316.731	-35.9462	297.385	-30.6049
316.863	-31.259	297.49	-29.2689
316.994	-29.5092	297.595	-27.931
317.125	-33.7056	297.7	-26.7234
317.256	-28.2826	297.805	-25.7004
317.387	-27.8495	297.91	-24.8756
317.519	-28.3472	298.015	-24.2417
317.65	-25.1231	298.12	-23.78
317.781	-27.0973	298.225	-23.4657
317.913	-22.9192	298.33	-23.2724
318.044	-22.6306	298.435	-23.1771
318.175	-23.3377	298.54	-23.1656
318.306	-22.0918	298.645	-23.2358
318.438	-22.8809	298.75	-23.3982
318.569	-21.4792	298.855	-23.6724
318.7	-21.8898	298.96	-24.0813
318.831	-22.1721	299.065	-24.6436
318.962	-21.2453	299.17	-25.3656
319.094	-20.0963	299.275	-26.2309
319.225	-23.1993	299.38	-27.1867
319.356	-26.6453	299.485	-28.1312
319.488	-24.0693	299.59	-28.9187
319.619	-19.5949	299.695	-29.4044
319.75	-22.525	299.8	-29.5127
319.881	-22.8765	299.905	-29.2599
320.012	-18.8003	300.01	-28.7119
320.144	-21.6438	300.115	-27.9446
320.275	-26.5782	300.22	-27.0389
320.406	-19.5586	300.325	-26.0831
320.538	-29.1003	300.43	-25.1604
320.669	-33.9288	300.535	-24.3345
320.8	-24.5126	300.64	-23.6419
320.931	-24.0868	300.745	-23.0919
321.062	-27.7826	300.85	-22.6706
321.194	-26.902	300.955	-22.3467
321.325	-30.4273	301.06	-22.0805
321.456	-33.3803	301.165	-21.8362
321.587	-36.7628	301.27	-21.5968
321.719	-36.1476	301.375	-21.3723
321.85	-47.1724	301.48	-21.1967
321.981	-29.9539	301.585	-21.1168
322.113	-28.8083	301.69	-21.1794
322.244	-30.0946	301.795	-21.4223
322.375	-25.0508	301.9	-21.8686
322.506	-27.1409	302.005	-22.5207
322.637	-25.5224	302.11	-23.35
322.769	-24.0102	302.215	-24.2823
322.9	-25.0928	302.32	-25.1895
323.031	-22.6895	302.425	-25.9203
323.163	-22.8513	302.53	-26.3881
323.294	-24.3905	302.635	-26.6407
323.425	-22.0828	302.74	-26.8128
323.556	-20.9894	302.845	-27.0157
323.688	-23.1163	302.95	-27.2623
323.819	-20.6295	303.055	-27.4446
323.95	-20.992	303.16	-27.3768
324.081	-21.5944	303.265	-26.9305
324.212	-20.126	303.37	-26.1601
324.344	-22.501	303.475	-25.2457
324.475	-21.8911	303.58	-24.35
324.606	-22.7028	303.685	-23.5541
324.738	-25.7616	303.79	-22.8706
324.869	-24.1833	303.895	-22.274
325	-27.1988	304	-21.729
		304.105	-21.2131
		304.21	-20.7282
		304.315	-20.2997
		304.42	-19.9645
		304.525	-19.7582
		304.63	-19.7049
		304.735	-19.8105
		304.84	-20.0575
		304.945	-20.399
		305.05	-20.7583
		305.155	-21.0417
		305.26	-21.1754
		305.365	-21.1456
		305.47	-21.0049
		305.575	-20.8369
		305.68	-20.7143
		305.785	-20.677
		305.89	-20.7312
		305.995	-20.8577
		306.1	-21.0242
		306.205	-21.202
		306.31	-21.3807
		306.415	-21.5744
		306.52	-21.816
		306.625	-22.1422
		306.73	-22.5803
		306.835	-23.1373
		306.94	-23.7954
		307.045	-24.5131
		307.15	-25.236
		307.255	-25.914
		307.36	-26.5114
		307.465	-26.9858
		307.57	-27.2384
		307.675	-27.0997
		307.78	-26.4433
		307.885	-25.3456
		307.99	-24.0473
		308.095	-22.7779
		308.2	-21.6743
		308.305	-20.7951
		308.41	-20.1537
		308.515	-19.7382
		308.62	-19.5216
		308.725	-19.4658
		308.83	-19.5247
		308.935	-19.6505
		309.04	-19.8049
		309.145	-19.9701
		309.25	-20.1557
		309.355	-20.3947
		309.46	-20.7312
		309.565	-21.2085
		309.67	-21.8609
		309.775	-22.7082
		309.88	-23.7517
		309.985	-24.9684
		310.09	-26.302
		310.195	-27.6511
		310.3	-28.8589
		310.405	-29.7118
		310.51	-29.9794
		310.615	-29.5438
		310.72	-28.5261
		310.825	-27.2089
		310.93	-25.8516
		311.035	-24.6112
		311.14	-23.5589
		311.245	-22.7152
		311.35	-22.0731
		311.455	-21.6115
		311.56	-21.3031
		311.665	-21.1199
		311.77	-21.039
		311.875	-21.0474
		311.98	-21.1457
		312.085	-21.3474
		312.19	-21.6764
		312.295	-22.163
		312.4	-22.8409
		312.505	-23.7467
		312.61	-24.9233
		312.715	-26.4286
		312.82	-28.3561
		312.925	-30.883
		313.03	-34.3943
		313.135	-39.7403
		313.24	-43.8136
		313.345	-37.7137
		313.45	-33.0905
		313.555	-29.9886
		313.66	-27.7318
		313.765	-26.0209
		313.87	-24.7074
		313.975	-23.7049
		314.08	-22.955
		314.185	-22.4131
		314.29	-22.0421
		314.395	-21.8122
		314.5	-21.7023
		314.605	-21.7023
		314.71	-21.8145
		314.815	-22.0536
		314.92	-22.445
		315.025	-23.0231
		315.13	-23.8312
		315.235	-24.9257
		315.34	-26.3877
		315.445	-28.3516
		315.55	-31.0823
		315.655	-35.2275
		315.76	-42.9058
		315.865	-43.5912
		315.97	-35.5367
		316.075	-31.2163
		316.18	-28.3438
		316.285	-26.2254
		316.39	-24.5868
		316.495	-23.2969
		316.6	-22.2831
		316.705	-21.4991
		316.81	-20.9105
		316.915	-20.4892
		317.02	-20.2101
		317.125	-20.0526
		317.23	-20.0015
		317.335	-20.0495
		317.44	-20.1989
		317.545	-20.4607
		317.65	-20.8541
		317.755	-21.4039
		317.86	-22.1388
		317.965	-23.0913
		318.07	-24.2984
		318.175	-25.8049
		318.28	-27.664
		318.385	-29.914
		318.49	-32.4168
		318.595	-34.2221
		318.7	-33.614
		318.805	-31.281
		318.91	-28.8359
		319.015	-26.7441
		319.12	-25.0233
		319.225	-23.6231
		319.33	-22.4949
		319.435	-21.599
		319.54	-20.9007
		319.645	-20.3683
		319.75	-19.9722
		319.855	-19.687
		319.96	-19.4937
		320.065	-19.3824
		320.17	-19.354
		320.275	-19.4187
		320.38	-19.5939
		320.485	-19.8996
		320.59	-20.3559
		320.695	-20.9801
		320.8	-21.7849
		320.905	-22.7771
		321.01	-23.9531
		321.115	-25.2887
		321.22	-26.7087
		321.325	-28.0189
		321.43	-28.8333
		321.535	-28.7362
		321.64	-27.7449
		321.745	-26.2991
		321.85	-24.7917
		321.955	-23.414
		322.06	-22.2315
		322.165	-21.2548
		322.27	-20.4718
		322.375	-19.8613
		322.48	-19.3983
		322.585	-19.0579
		322.69	-18.8185
		322.795	-18.6652
		322.9	-18.592
		323.005	-18.6019
		323.11	-18.7053
		323.215	-18.9164
		323.32	-19.2493
		323.425	-19.7153
		323.53	-20.3201
		323.635	-21.0623
		323.74	-21.9328
		323.845	-22.9133
		323.95	-23.9726
		324.055	-25.0534
		324.16	-26.0437
		324.265	-26.743
		324.37	-26.9005
		324.475	-26.4032
		324.58	-25.4126
		324.685	-24.217
		324.79	-23.0364
		324.895	-21.9824
		325	-21.0943
