# Supplementary material for: 220–325GHz All-Photopolymer Bragg Horn Antennas Towards Eco-Friendly Terahertz Applications
Source: Research Square preprint supplement (doi:10.21203/rs.3.rs-6221054/v1), 2025-04-21
Supplement: Supplementary file 2 [file 8ffb463261984c58021c4a78.xlsx]

## Sheet: Design_5_degree_220_GHz
Degree	Simulated	Degree	Measured
-180	-27.2954	-45	-47.0251
-179	-27.4094	-40	-46.7354
-178	-28.0247	-35	-45.0259
-177	-29.6015	-30	-44.0052
-176	-31.9775	-25	-38.5996
-175	-34.5508	-20	-34.5895
-174	-36.8863	-15	-28.2399
-173	-38.0664	-10	-21.7343
-172	-38.564	-9	-18.3567
-171	-40.7299	-8	-14.6778
-170	-45.2505	-7	-11.6677
-169	-52.3271	-6	-9.21275
-168	-59.0544	-5	-7.1842
-167	-54.2238	-4	-4.00046
-166	-54.02	-3	-2.42525
-165	-55.3053	-2	-1.07243
-164	-59.758	-1	-0.48035
-163	-62.7702	0	0
-162	-60.8984	1	-0.48035
-161	-60.7572	2	-1.07243
-160	-64.6778	3	-2.42525
-159	-65.8318	4	-4.00046
-158	-65.7445	5	-7.1842
-157	-66.0378	6	-9.21275
-156	-67.9524	7	-11.6677
-155	-67.7391	8	-14.6778
-154	-68.9827	9	-18.3567
-153	-66.848	10	-21.7343
-152	-66.1048	15	-28.2399
-151	-69.1736	20	-34.5895
-150	-75.4561	25	-38.5996
-149	-78.2486	30	-44.0052
-148	-71.575	35	-45.0259
-147	-71.1607	40	-46.7354
-146	-72.0747	45	-47.0251
-145	-74.6904
-144	-76.7427
-143	-68.6917
-142	-69.2798
-141	-72.0144
-140	-77.1155
-139	-76.791
-138	-71.1825
-137	-69.6989
-136	-72.8948
-135	-79.8879
-134	-82.0289
-133	-77.2133
-132	-78.068
-131	-73.0455
-130	-69.0429
-129	-73.4647
-128	-75.1137
-127	-75.6415
-126	-72.4197
-125	-74.1017
-124	-65.0375
-123	-70.8889
-122	-79.8612
-121	-81.0151
-120	-77.9115
-119	-87.1819
-118	-83.1412
-117	-78.0178
-116	-77.3718
-115	-68.9087
-114	-65.8911
-113	-65.0018
-112	-66.144
-111	-65.5399
-110	-69.1331
-109	-71.945
-108	-66.5471
-107	-64.1857
-106	-63.763
-105	-62.7075
-104	-62.3703
-103	-64.4833
-102	-64.9189
-101	-63.182
-100	-64.1838
-99	-61.1669
-98	-61.017
-97	-61.5738
-96	-60.4811
-95	-62.3953
-94	-59.3695
-93	-68.4646
-92	-59.2139
-91	-64.8131
-90	-59.6815
-89	-61.1376
-88	-60.4144
-87	-58.4414
-86	-57.8687
-85	-57.2831
-84	-55.7323
-83	-55.5701
-82	-53.8277
-81	-53.7305
-80	-51.9599
-79	-52.7697
-78	-51.9687
-77	-52.2268
-76	-52.6597
-75	-54.9403
-74	-57.233
-73	-60.1957
-72	-67.1896
-71	-68.9432
-70	-59.0195
-69	-55.6605
-68	-53.0509
-67	-51.2869
-66	-51.249
-65	-51.206
-64	-50.759
-63	-55.6364
-62	-60.6673
-61	-73.1378
-60	-55.2286
-59	-54.0399
-58	-49.4129
-57	-49.5767
-56	-50.3313
-55	-52.2803
-54	-64.6849
-53	-60.6344
-52	-51.7204
-51	-49.019
-50	-49.1452
-49	-49.3809
-48	-53.5458
-47	-61.2148
-46	-53.4541
-45	-48.2669
-44	-46.5129
-43	-47.0821
-42	-51.4401
-41	-65.5463
-40	-50.8361
-39	-45.0649
-38	-44.2845
-37	-46.3954
-36	-56.1247
-35	-48.7413
-34	-43.3726
-33	-41.8119
-32	-44.9518
-31	-53.4273
-30	-44.2039
-29	-40.4429
-28	-39.2897
-27	-42.5236
-26	-45.0348
-25	-40.1904
-24	-37.1306
-23	-36.658
-22	-38.5459
-21	-39.1579
-20	-34.4925
-19	-33.6701
-18	-31.2705
-17	-36.9424
-16	-32.1186
-15	-26.8178
-14	-25.2381
-13	-28.0348
-12	-31.1736
-11	-23.6206
-10	-17.857
-9	-13.1401
-8	-10.8914
-7	-10.7036
-6	-9.91567
-5	-7.37296
-4	-4.62139
-3	-2.29069
-2	-0.7148
-1	-0.08576
0	0
1	-0.08576
2	-0.7148
3	-2.29069
4	-4.62139
5	-7.37296
6	-9.91567
7	-10.7036
8	-10.8914
9	-13.1401
10	-17.857
11	-23.6206
12	-31.1737
13	-28.0348
14	-25.2381
15	-26.8178
16	-32.1187
17	-36.9424
18	-31.2704
19	-33.67
20	-34.4925
21	-39.1579
22	-38.5461
23	-36.6581
24	-37.1307
25	-40.1905
26	-45.0348
27	-42.5234
28	-39.2895
29	-40.4427
30	-44.2038
31	-53.428
32	-44.9521
33	-41.8122
34	-43.3729
35	-48.7418
36	-56.1239
37	-46.3949
38	-44.2842
39	-45.0645
40	-50.8354
41	-65.5471
42	-51.4409
43	-47.0826
44	-46.5133
45	-48.2674
46	-53.4547
47	-61.2125
48	-53.5447
49	-49.3803
50	-49.1446
51	-49.0185
52	-51.7197
53	-60.6325
54	-64.6883
55	-52.281
56	-50.3319
57	-49.5772
58	-49.4134
59	-54.0408
60	-55.2294
61	-73.1456
62	-60.6651
63	-55.6355
64	-50.7585
65	-51.2054
66	-51.2486
67	-51.2864
68	-53.0503
69	-55.6598
70	-59.0187
71	-68.9416
72	-67.1934
73	-60.1973
74	-57.2338
75	-54.9409
76	-52.6601
77	-52.2271
78	-51.9689
79	-52.77
80	-51.96
81	-53.7307
82	-53.8277
83	-55.5703
84	-55.7323
85	-57.2832
86	-57.8687
87	-58.4413
88	-60.4144
89	-61.1372
90	-59.6813
91	-64.8116
92	-59.2133
93	-68.4634
94	-59.3693
95	-62.394
96	-60.4799
97	-61.5727
98	-61.0158
99	-61.1658
100	-64.1822
101	-63.1808
102	-64.9183
103	-64.4829
104	-62.3706
105	-62.7081
106	-63.7639
107	-64.187
108	-66.5489
109	-71.9472
110	-69.1334
111	-65.5387
112	-66.1424
113	-65.0004
114	-65.8898
115	-68.9072
116	-77.3686
117	-78.021
118	-83.1503
119	-87.1763
120	-77.9153
121	-81.0172
122	-79.8655
123	-70.8874
124	-65.0376
125	-74.1039
126	-72.4183
127	-75.6426
128	-75.1125
129	-73.4646
130	-69.0434
131	-73.0469
132	-78.0705
133	-77.2137
134	-82.029
135	-79.886
136	-72.8938
137	-69.6982
138	-71.1818
139	-76.7905
140	-77.1165
141	-72.015
142	-69.2802
143	-68.692
144	-76.7429
145	-74.6898
146	-72.0743
147	-71.1604
148	-71.5747
149	-78.2482
150	-75.4563
151	-69.1737
152	-66.1049
153	-66.848
154	-68.9827
155	-67.7391
156	-67.9524
157	-66.0378
158	-65.7445
159	-65.8318
160	-64.6778
161	-60.7572
162	-60.8983
163	-62.7702
164	-59.7581
165	-55.3053
166	-54.02
167	-54.2238
168	-59.0544
169	-52.3271
170	-45.2505
171	-40.7299
172	-38.564
173	-38.0664
174	-36.8863
175	-34.5508
176	-31.9775
177	-29.6015
178	-28.0247
179	-27.4094
180	-27.2954

## Sheet: Design_5_degree_270_GHz
Degree	Simulated	Degree	Measured
-180	-21.4416	-45	-50.6478
-179	-21.9333	-40	-49.2339
-178	-23.1483	-35	-48.9727
-177	-24.7868	-30	-47.6549
-176	-26.8932	-25	-46.4412
-175	-28.8219	-20	-40.5733
-174	-30.5121	-15	-36.3839
-173	-32.6223	-10	-24.2607
-172	-35.7262	-9	-20.8199
-171	-39.8133	-8	-17.3386
-170	-43.0755	-7	-14.4182
-169	-46.0024	-6	-10.8602
-168	-51.5305	-5	-8.45683
-167	-63.7634	-4	-6.81248
-166	-59.0864	-3	-4.71311
-165	-58.7982	-2	-2.65682
-164	-65.9577	-1	-1.83702
-163	-60.8152	0	0
-162	-58.9336	1	-1.83702
-161	-63.3174	2	-2.65682
-160	-64.2912	3	-4.71311
-159	-65.2569	4	-6.81248
-158	-64.7772	5	-8.45683
-157	-71.7304	6	-10.8602
-156	-74.6114	7	-14.4182
-155	-76.9359	8	-17.3386
-154	-67.9692	9	-20.8199
-153	-67.8914	10	-24.2607
-152	-74.1665	15	-36.3839
-151	-75.4066	20	-40.5733
-150	-72.9978	25	-46.4412
-149	-73.6155	30	-47.6549
-148	-80.4614	35	-48.9727
-147	-87.4789	40	-49.2339
-146	-83.5765	45	-50.6478
-145	-83.5814
-144	-75.0886
-143	-82.0681
-142	-81.6073
-141	-84.722
-140	-79.0092
-139	-82.6227
-138	-74.6379
-137	-75.9293
-136	-69.0467
-135	-71.8734
-134	-80.8471
-133	-78.2938
-132	-80.0214
-131	-84.9688
-130	-79.8058
-129	-80.2233
-128	-91.6101
-127	-81.7301
-126	-75.6697
-125	-89.5316
-124	-84.7328
-123	-77.2773
-122	-81.6462
-121	-80.5068
-120	-87.054
-119	-91.1671
-118	-92.023
-117	-79.1909
-116	-80.2606
-115	-80.036
-114	-86.2084
-113	-77.3245
-112	-81.384
-111	-86.8815
-110	-74.5112
-109	-74.3393
-108	-72.9588
-107	-71.2722
-106	-67.4251
-105	-69.9648
-104	-67.6972
-103	-66.1564
-102	-68.928
-101	-68.8791
-100	-67.4909
-99	-69.416
-98	-70.9208
-97	-71.8272
-96	-71.1668
-95	-72.7303
-94	-75.9668
-93	-74.0746
-92	-80.693
-91	-78.6581
-90	-72.9451
-89	-77.2842
-88	-76.338
-87	-71.1679
-86	-65.3662
-85	-74.9512
-84	-71.0418
-83	-61.1981
-82	-56.4245
-81	-53.3586
-80	-66.0901
-79	-63.2203
-78	-73.2539
-77	-62.2448
-76	-59.89
-75	-62.7959
-74	-63.6008
-73	-78.4613
-72	-64.256
-71	-63.7975
-70	-61.7379
-69	-60.6521
-68	-65.2587
-67	-74.7505
-66	-67.3395
-65	-59.9665
-64	-60.8782
-63	-64.9692
-62	-65.6097
-61	-59.3798
-60	-57.4781
-59	-55.742
-58	-55.795
-57	-57.8184
-56	-64.2604
-55	-81.5964
-54	-67.0499
-53	-61.8895
-52	-60.9009
-51	-61.1216
-50	-68.5471
-49	-63.5229
-48	-58.1156
-47	-61.3068
-46	-53.8152
-45	-67.1297
-44	-55.008
-43	-54.9522
-42	-56.3047
-41	-62.4258
-40	-66.7124
-39	-51.6409
-38	-59.7966
-37	-54.2071
-36	-58.593
-35	-60.3468
-34	-53.8446
-33	-51.8247
-32	-54.9474
-31	-50.5857
-30	-49.3326
-29	-46.1809
-28	-51.1981
-27	-46.8132
-26	-43.278
-25	-43.2693
-24	-46.5486
-23	-52.799
-22	-45.9213
-21	-46.0051
-20	-41.6888
-19	-39.6901
-18	-34.7999
-17	-39.0713
-16	-41.1729
-15	-37.3939
-14	-35.347
-13	-50.3836
-12	-28.3506
-11	-25.0997
-10	-20.3941
-9	-18.1342
-8	-14.1721
-7	-10.6212
-6	-9.0586
-5	-7.44504
-4	-5.4433
-3	-3.29784
-2	-1.65413
-1	-0.50473
0	0
1	-0.50473
2	-1.65413
3	-3.29784
4	-5.4433
5	-7.44503
6	-9.0586
7	-10.6212
8	-14.1721
9	-18.1342
10	-20.3941
11	-25.0997
12	-28.3506
13	-50.3839
14	-35.347
15	-37.3939
16	-41.1728
17	-39.0711
18	-34.7998
19	-39.6901
20	-41.6889
21	-46.0055
22	-45.9213
23	-52.7992
24	-46.5482
25	-43.2692
26	-43.278
27	-46.8136
28	-51.1989
29	-46.1809
30	-49.3322
31	-50.5853
32	-54.9459
33	-51.8251
34	-53.8458
35	-60.3478
36	-58.5954
37	-54.2063
38	-59.796
39	-51.6402
40	-66.7146
41	-62.4221
42	-56.3057
43	-54.9527
44	-55.0094
45	-67.1236
46	-53.8156
47	-61.3043
48	-58.114
49	-63.5189
50	-68.5409
51	-61.1245
52	-60.9026
53	-61.8911
54	-67.052
55	-81.5704
56	-64.2569
57	-57.8168
58	-55.7937
59	-55.7407
60	-57.4764
61	-59.3778
62	-65.6069
63	-64.9719
64	-60.8806
65	-59.9684
66	-67.342
67	-74.7401
68	-65.2593
69	-60.6538
70	-61.74
71	-63.7961
72	-64.2532
73	-78.4524
74	-63.5988
75	-62.7938
76	-59.8884
77	-62.2428
78	-73.2478
79	-63.219
80	-66.0893
81	-53.3585
82	-56.4241
83	-61.1965
84	-71.0373
85	-74.9587
86	-65.3661
87	-71.1637
88	-76.3376
89	-77.2906
90	-72.9431
91	-78.6503
92	-80.6883
93	-74.0728
94	-75.9641
95	-72.7311
96	-71.1669
97	-71.8241
98	-70.9195
99	-69.4156
100	-67.4897
101	-68.8772
102	-68.9265
103	-66.1548
104	-67.6953
105	-69.962
106	-67.4231
107	-71.2695
108	-72.9561
109	-74.339
110	-74.5117
111	-86.8857
112	-81.3876
113	-77.3232
114	-86.2022
115	-80.0341
116	-80.2577
117	-79.1957
118	-92.0259
119	-91.1512
120	-87.0587
121	-80.5103
122	-81.6447
123	-77.2786
124	-84.7269
125	-89.5197
126	-75.6685
127	-81.7275
128	-91.6021
129	-80.2259
130	-79.8046
131	-84.974
132	-80.0203
133	-78.2958
134	-80.8443
135	-71.8735
136	-69.0461
137	-75.9296
138	-74.6381
139	-82.6211
140	-79.0103
141	-84.7213
142	-81.6075
143	-82.0673
144	-75.0883
145	-83.5808
146	-83.5762
147	-87.4789
148	-80.4614
149	-73.6155
150	-72.9979
151	-75.4068
152	-74.1668
153	-67.8915
154	-67.9691
155	-76.9353
156	-74.6117
157	-71.7301
158	-64.7772
159	-65.2571
160	-64.2913
161	-63.3174
162	-58.9336
163	-60.8151
164	-65.9576
165	-58.7982
166	-59.0864
167	-63.7635
168	-51.5305
169	-46.0024
170	-43.0755
171	-39.8132
172	-35.7262
173	-32.6223
174	-30.5121
175	-28.8219
176	-26.8932
177	-24.7868
178	-23.1483
179	-21.9333
180	-21.4416

## Sheet: Design_5_degree_320_GHz
Degree	Simulated	Degree	Measured
-180	-19.655	-45	-50.3775
-179	-20.1175	-40	-49.537
-178	-22.0799	-35	-49.8138
-177	-25.9499	-30	-49.5849
-176	-31.1557	-25	-49.2652
-175	-34.9361	-20	-47.2199
-174	-37.9967	-15	-45.335
-173	-47.9061	-10	-41.8301
-172	-53.344	-9	-38.4002
-171	-53.5623	-8	-34.3793
-170	-57.7007	-7	-27.9263
-169	-62.7906	-6	-18.7023
-168	-61.7544	-5	-12.2062
-167	-57.4126	-4	-6.65753
-166	-63.0364	-3	-4.29952
-165	-66.2616	-2	-1.84849
-164	-68.5597	-1	-0.44928
-163	-69.6777	0	0
-162	-67.709	1	-0.44928
-161	-67.6566	2	-1.84849
-160	-69.4947	3	-4.29952
-159	-70.62	4	-6.65753
-158	-71.2375	5	-12.2062
-157	-72.4295	6	-18.7023
-156	-76.2001	7	-27.9263
-155	-75.2845	8	-34.3793
-154	-77.7539	9	-38.4002
-153	-104.541	10	-41.8301
-152	-75.4626	15	-45.335
-151	-81.1401	20	-47.2199
-150	-82.9505	25	-49.2652
-149	-76.9281	30	-49.5849
-148	-80.5463	35	-49.8138
-147	-80.6476	40	-49.537
-146	-77.8187	45	-50.3775
-145	-85.8465
-144	-79.8361
-143	-84.4911
-142	-81.5164
-141	-87.6718
-140	-89.4406
-139	-91.6618
-138	-87.7476
-137	-88.6358
-136	-87.7684
-135	-81.7182
-134	-83.4146
-133	-83.3706
-132	-94.3866
-131	-85.544
-130	-89.7525
-129	-80.912
-128	-82.1656
-127	-89.5417
-126	-93.739
-125	-79.6399
-124	-81.7708
-123	-84.7622
-122	-92.0279
-121	-87.5118
-120	-85.8639
-119	-87.3936
-118	-81.555
-117	-79.2683
-116	-89.6869
-115	-74.5375
-114	-80.3861
-113	-79.6408
-112	-86.39
-111	-82.0071
-110	-79.9908
-109	-78.7958
-108	-75.8526
-107	-77.027
-106	-74.2656
-105	-73.3814
-104	-75.1113
-103	-74.312
-102	-75.5004
-101	-76.7501
-100	-78.3222
-99	-76.9005
-98	-77.0915
-97	-75.9761
-96	-71.9679
-95	-71.861
-94	-74.4623
-93	-71.7424
-92	-74.1837
-91	-73.3966
-90	-72.9261
-89	-73.5605
-88	-71.3674
-87	-70.4831
-86	-68.0886
-85	-67.4775
-84	-68.6039
-83	-67.3733
-82	-68.3203
-81	-68.9647
-80	-68.6076
-79	-68.6307
-78	-65.7209
-77	-64.6278
-76	-71.0263
-75	-68.7899
-74	-64.7828
-73	-61.419
-72	-62.1875
-71	-65.3626
-70	-69.9145
-69	-65.2896
-68	-68.598
-67	-66.8645
-66	-65.9681
-65	-62.276
-64	-64.5183
-63	-64.2484
-62	-72.7732
-61	-69.2104
-60	-65.4177
-59	-72.3014
-58	-73.9232
-57	-67.4942
-56	-64.7177
-55	-67.9424
-54	-64.353
-53	-64.6877
-52	-64.1578
-51	-61.2839
-50	-61.2067
-49	-64.1286
-48	-80.4788
-47	-63.8061
-46	-57.7104
-45	-58.3026
-44	-62.9506
-43	-58.8263
-42	-59.068
-41	-65.8946
-40	-65.0285
-39	-61.3258
-38	-59.9719
-37	-65.0219
-36	-60.6361
-35	-59.49
-34	-57.4242
-33	-58.7211
-32	-61.04
-31	-54.367
-30	-66.6744
-29	-59.767
-28	-52.8903
-27	-66.8784
-26	-61.1503
-25	-59.0129
-24	-57.6197
-23	-56.2097
-22	-53.288
-21	-52.2018
-20	-50.3164
-19	-47.6767
-18	-46.8245
-17	-52.7877
-16	-51.9252
-15	-49.268
-14	-42.226
-13	-39.5478
-12	-42.4171
-11	-43.7794
-10	-38.9542
-9	-32.7075
-8	-33.8215
-7	-28.5338
-6	-18.4569
-5	-15.0806
-4	-11.4738
-3	-6.29584
-2	-2.45136
-1	-0.45037
0	0
1	-0.45037
2	-2.45136
3	-6.29584
4	-11.4738
5	-15.0806
6	-18.4569
7	-28.5338
8	-33.8214
9	-32.7075
10	-38.9542
11	-43.7793
12	-42.417
13	-39.5476
14	-42.226
15	-49.2685
16	-51.9259
17	-52.7886
18	-46.8243
19	-47.6761
20	-50.3165
21	-52.2028
22	-53.2888
23	-56.2086
24	-57.6181
25	-59.0123
26	-61.1475
27	-66.8807
28	-52.8915
29	-59.7689
30	-66.6714
31	-54.3656
32	-61.0373
33	-58.7226
34	-57.4263
35	-59.4915
36	-60.6351
37	-65.0169
38	-59.9705
39	-61.3232
40	-65.0237
41	-65.8965
42	-59.0695
43	-58.8274
44	-62.9491
45	-58.3006
46	-57.7085
47	-63.8023
48	-80.5015
49	-64.1324
50	-61.2089
51	-61.285
52	-64.1557
53	-64.6843
54	-64.3525
55	-67.9411
56	-64.7161
57	-67.4976
58	-73.9269
59	-72.3058
60	-65.4187
61	-69.2093
62	-72.7716
63	-64.2465
64	-64.5181
65	-62.2759
66	-65.9699
67	-66.8668
68	-68.6008
69	-65.2918
70	-69.9169
71	-65.3634
72	-62.1868
73	-61.4197
74	-64.7835
75	-68.7905
76	-71.0233
77	-64.6264
78	-65.7195
79	-68.6284
80	-68.6052
81	-68.9623
82	-68.3186
83	-67.3719
84	-68.6027
85	-67.4768
86	-68.0881
87	-70.4814
88	-71.3666
89	-73.5598
90	-72.926
91	-73.3959
92	-74.1837
93	-71.7426
94	-74.4625
95	-71.8606
96	-71.9667
97	-75.9734
98	-77.088
99	-76.8967
100	-78.3175
101	-76.7464
102	-75.498
103	-74.3111
104	-75.1113
105	-73.382
106	-74.2672
107	-77.0292
108	-75.8553
109	-78.8002
110	-79.9958
111	-82.0125
112	-86.3844
113	-79.638
114	-80.3869
115	-74.5362
116	-89.6739
117	-79.2658
118	-81.5568
119	-87.3966
120	-85.8582
121	-87.5054
122	-92.0146
123	-84.7609
124	-81.7717
125	-79.643
126	-93.7296
127	-89.5407
128	-82.1623
129	-80.9122
130	-89.7543
131	-85.5438
132	-94.3874
133	-83.3689
134	-83.4155
135	-81.7198
136	-87.7648
137	-88.6335
138	-87.7451
139	-91.6587
140	-89.4432
141	-87.671
142	-81.5168
143	-84.4915
144	-79.836
145	-85.8462
146	-77.8189
147	-80.6482
148	-80.5457
149	-76.9276
150	-82.9492
151	-81.1406
152	-75.4633
153	-104.528
154	-77.7529
155	-75.2841
156	-76.1992
157	-72.4292
158	-71.2378
159	-70.6206
160	-69.4948
161	-67.6562
162	-67.7087
163	-69.6782
164	-68.5601
165	-66.2619
166	-63.0364
167	-57.4126
168	-61.7543
169	-62.7905
170	-57.7006
171	-53.5623
172	-53.344
173	-47.906
174	-37.9967
175	-34.9361
176	-31.1557
177	-25.9499
178	-22.0799
179	-20.1175
180	-19.655
