# Supplementary material for: 220–325GHz All-Photopolymer Bragg Horn Antennas Towards Eco-Friendly Terahertz Applications
Source: Research Square preprint supplement (doi:10.21203/rs.3.rs-6221054/v1), 2025-04-21
Supplement: Supplementary file 3 [file 95bebbef3b87c12bade60ff7.xlsx]

## Sheet: Sheet1
Frequency	Simulated	Measured
220	25.31	24.61
230	25.72	25.19
240	25.85	25.53
250	26.1	25.74
260	26.31	25.83
270	26.67	25.91
280	28.14	27.72
290	29.07	28.67
300	29.48	28.98
310	29.39	28.92
320	28.98	27.74
