# Supplementary material for: 220–325GHz All-Photopolymer Bragg Horn Antennas Towards Eco-Friendly Terahertz Applications
Source: Research Square preprint supplement (doi:10.21203/rs.3.rs-6221054/v1), 2025-04-21
Supplement: Supplementary file 4 [file 9bc22813af7c2317c0ed5b0a.xlsx]

## Sheet: 220_degree_5
CST XY Data Exchange Format V2
Title = Farfield Realized Gain Abs (Phi=0)
Xlabel = Theta / Degree
Ylabel = dBi
Curvelabel = farfield (f=0.22) [1]
Filename = ^farfield (f=0.22) [1].sig
Npoints = 361
Type = 8
Subtype = 15
Result type = farfield:cartesian
View type = Cartesian
Plot type = Real
Data/Title = Farfield Realized Gain Abs (Phi=0)
X/Label = Theta
X/Unit = deg
Y/Unit = dBi
Y/Logfactor = 10
Plot/wrapHeuristics = 0
Farfield/Plot/AngularWidthOne|double = -3.3413124295272
Farfield/Plot/AngularWidthTwo|double = 3.3413124828235
Farfield/Plot/ComplexComponent|string = Abs
Farfield/Plot/InfoText|string = Frequency = 0.22 THz\r\nMain lobe magnitude = 25.3 dBi\r\nMain lobe direction = 0.0 deg.\r\nAngular width (3 dB) = 6.7 deg.\r\nSide lobe level = -21.0 dB\r\n
Farfield/Plot/MainLobeDirection|double = 0
Farfield/Plot/Orientation|double = 180
Farfield/Plot/SideLobeRadius|double = 4.2565034370504
Farfield/Plot/Version|int = 20101010
Farfield/Polar/Quadrant1Left|double = 0
Farfield/Polar/Quadrant1Right|double = 90
Farfield/Polar/Quadrant2Left|double = 90
Farfield/Polar/Quadrant2Right|double = 180
Farfield/Polar/Quadrant3Left|double = -180
Farfield/Polar/Quadrant3Right|double = -90
Farfield/Polar/Quadrant4Left|double = -90
Farfield/Polar/Quadrant4Right|double = 0
180	-180	4.2565
181	-179	4.15527
182	-178	3.5533
183	-177	2.04679
184	-176	-0.209777
185	-175	-2.85998
186	-174	-5.35947
187	-173	-6.56466
188	-172	-7.22389
189	-171	-9.11836
190	-170	-13.8942
191	-169	-22.8287
192	-168	-28.5779
193	-167	-24.3274
194	-166	-20.768
195	-165	-22.5511
196	-164	-30.6288
197	-163	-32.0353
198	-162	-31.9392
199	-161	-30.6246
200	-160	-38.8876
201	-159	-43.5159
202	-158	-59.5166
203	-157	-51.8702
204	-156	-48.5439
205	-155	-54.8102
206	-154	-54.4357
207	-153	-47.6677
208	-152	-50.3383
209	-151	-58.9215
210	-150	-54.0046
211	-149	-52.3644
212	-148	-59.3934
213	-147	-58.1357
214	-146	-60.4085
215	-145	-62.6225
216	-144	-66.3888
217	-143	-58.2531
218	-142	-73.0057
219	-141	-53.7946
220	-140	-52.8338
221	-139	-52.5447
222	-138	-56.5927
223	-137	-56.9469
224	-136	-58.1881
225	-135	-52.9487
226	-134	-54.1524
227	-133	-55.9539
228	-132	-57.6968
229	-131	-69.2646
230	-130	-60.2567
231	-129	-60.7901
232	-128	-51.9307
233	-127	-51.0924
234	-126	-49.4326
235	-125	-49.0009
236	-124	-43.8124
237	-123	-43.8083
238	-122	-56.7138
239	-121	-57.7016
240	-120	-50.9904
241	-119	-54.7466
242	-118	-52.3577
243	-117	-46.84
244	-116	-54.2442
245	-115	-49.6511
246	-114	-47.2214
247	-113	-48.7998
248	-112	-55.7516
249	-111	-49.9866
250	-110	-49.0768
251	-109	-45.8422
252	-108	-39.6272
253	-107	-41.0714
254	-106	-43.6481
255	-105	-41.261
256	-104	-47.1689
257	-103	-46.9318
258	-102	-44.1091
259	-101	-45.3432
260	-100	-40.3306
261	-99	-40.275
262	-98	-39.4979
263	-97	-46.7406
264	-96	-39.7092
265	-95	-46.1921
266	-94	-38.1494
267	-93	-34.6234
268	-92	-43.5023
269	-91	-42.5319
270	-90	-38.732
271	-89	-47.0951
272	-88	-36.8446
273	-87	-36.5579
274	-86	-34.4935
275	-85	-34.4161
276	-84	-33.144
277	-83	-31.0751
278	-82	-31.6066
279	-81	-31.9357
280	-80	-29.8747
281	-79	-26.2869
282	-78	-27.4632
283	-77	-27.9499
284	-76	-26.7224
285	-75	-26.8418
286	-74	-29.9837
287	-73	-28.8837
288	-72	-30.6602
289	-71	-40.111
290	-70	-41.6779
291	-69	-35.4258
292	-68	-29.237
293	-67	-26.6882
294	-66	-27.1538
295	-65	-24.5061
296	-64	-23.9173
297	-63	-27.4518
298	-62	-27.3961
299	-61	-40.2107
300	-60	-36.8793
301	-59	-32.0499
302	-58	-25.9777
303	-57	-25.189
304	-56	-23.438
305	-55	-24.6258
306	-54	-26.7397
307	-53	-42.4073
308	-52	-34.7295
309	-51	-26.9264
310	-50	-23.4535
311	-49	-23.5486
312	-48	-23.1241
313	-47	-28.5383
314	-46	-33.0544
315	-45	-33.8377
316	-44	-25.0371
317	-43	-21.6662
318	-42	-20.4177
319	-41	-20.8372
320	-40	-26.8255
321	-39	-32.4475
322	-38	-25.4947
323	-37	-20.1765
324	-36	-19.7816
325	-35	-21.7303
326	-34	-23.6614
327	-33	-26.9062
328	-32	-24.7386
329	-31	-18.5353
330	-30	-16.7861
331	-29	-19.6764
332	-28	-20.7526
333	-27	-34.3721
334	-26	-20.7561
335	-25	-16.0843
336	-24	-17.1233
337	-23	-21.423
338	-22	-16.3776
339	-21	-12.3199
340	-20	-11.069
341	-19	-9.08244
342	-18	-5.97865
343	-17	-4.57471
344	-16	-9.29383
345	-15	-0.644301
346	-14	-0.253672
347	-13	-5.14651
348	-12	-28.3545
349	-11	-5.92049
350	-10	6.93956
351	-9	11.3332
352	-8	12.7457
353	-7	13.6826
354	-6	15.5236
355	-5	18.4758
356	-4	20.8403
357	-3	23.0656
358	-2	24.6274
359	-1	25.3052
0	0	25.3061
1	1	25.3052
2	2	24.6274
3	3	23.0656
4	4	20.8403
5	5	18.4758
6	6	15.5236
7	7	13.6826
8	8	12.7457
9	9	11.3332
10	10	6.93956
11	11	-5.92051
12	12	-28.3548
13	13	-5.14651
14	14	-0.253654
15	15	-0.644321
16	16	-9.29378
17	17	-4.57472
18	18	-5.97866
19	19	-9.08241
20	20	-11.069
21	21	-12.3199
22	22	-16.3775
23	23	-21.4231
24	24	-17.1233
25	25	-16.0844
26	26	-20.7559
27	27	-34.3719
28	28	-20.7524
29	29	-19.6766
30	30	-16.7862
31	31	-18.5351
32	32	-24.7383
33	33	-26.906
34	34	-23.6615
35	35	-21.7306
36	36	-19.7819
37	37	-20.1766
38	38	-25.4945
39	39	-32.4466
40	40	-26.8255
41	41	-20.8371
42	42	-20.4175
43	43	-21.6659
44	44	-25.0366
45	45	-33.8362
46	46	-33.0545
47	47	-28.5381
48	48	-23.1239
49	49	-23.5484
50	50	-23.4534
51	51	-26.9262
52	52	-34.729
53	53	-42.4061
54	54	-26.7398
55	55	-24.6257
56	56	-23.4379
57	57	-25.1886
58	58	-25.9772
59	59	-32.0489
60	60	-36.8807
61	61	-40.2107
62	62	-27.3958
63	63	-27.4513
64	64	-23.9171
65	65	-24.5061
66	66	-27.1542
67	67	-26.6885
68	68	-29.237
69	69	-35.4246
70	70	-41.6772
71	71	-40.1098
72	72	-30.6595
73	73	-28.8835
74	74	-29.9842
75	75	-26.842
76	76	-26.7222
77	77	-27.9496
78	78	-27.4634
79	79	-26.2872
80	80	-29.8744
81	81	-31.9352
82	82	-31.6071
83	83	-31.0754
84	84	-33.1436
85	85	-34.4155
86	86	-34.4941
87	87	-36.5583
88	88	-36.844
89	89	-47.0939
90	90	-38.733
91	91	-42.5333
92	92	-43.5033
93	93	-34.6228
94	94	-38.1497
95	95	-46.1943
96	96	-39.7098
97	97	-46.7393
98	98	-39.4983
99	99	-40.276
100	100	-40.3302
101	101	-45.3416
102	102	-44.1106
103	103	-46.9328
104	104	-47.1686
105	105	-41.262
106	106	-43.6488
107	107	-41.0706
108	108	-39.6264
109	109	-45.8412
110	110	-49.0784
111	111	-49.9881
112	112	-55.7558
113	113	-48.8008
114	114	-47.2224
115	115	-49.6504
116	116	-54.2415
117	117	-46.8386
118	118	-52.3552
119	119	-54.7492
120	120	-50.9913
121	121	-57.7058
122	122	-56.7169
123	123	-43.8075
124	124	-43.8128
125	125	-49.0014
126	126	-49.4322
127	127	-51.094
128	128	-51.9298
129	129	-60.7902
130	130	-60.2538
131	131	-69.2745
132	132	-57.6993
133	133	-55.9553
134	134	-54.1533
135	135	-52.9498
136	136	-58.1889
137	137	-56.948
138	138	-56.5939
139	139	-52.5453
140	140	-52.8335
141	141	-53.794
142	142	-73.009
143	143	-58.2526
144	144	-66.3891
145	145	-62.6223
146	146	-60.4087
147	147	-58.1357
148	148	-59.3933
149	149	-52.3643
150	150	-54.0044
151	151	-58.921
152	152	-50.3382
153	153	-47.6675
154	154	-54.436
155	155	-54.8096
156	156	-48.544
157	157	-51.8703
158	158	-59.5157
159	159	-43.5161
160	160	-38.8875
161	161	-30.6246
162	162	-31.9391
163	163	-32.0354
164	164	-30.6288
165	165	-22.5511
166	166	-20.768
167	167	-24.3274
168	168	-28.5779
169	169	-22.8287
170	170	-13.8942
171	171	-9.11836
172	172	-7.22389
173	173	-6.56466
174	174	-5.35947
175	175	-2.85998
176	176	-0.209777
177	177	2.04679
178	178	3.5533
179	179	4.15526
180	180	4.2565

## Sheet: 270 degree_5
CST XY Data Exchange Format V2
Title = Farfield Realized Gain Abs (Phi=0)
Xlabel = Theta / Degree
Ylabel = dBi
Curvelabel = farfield (f=0.27) [1]
Filename = ^farfield (f=0.27) [1].sig
Npoints = 361
Type = 8
Subtype = 15
Result type = farfield:cartesian
View type = Cartesian
Plot type = Real
Data/Title = Farfield Realized Gain Abs (Phi=0)
X/Label = Theta
X/Unit = deg
Y/Unit = dBi
Y/Logfactor = 10
Plot/wrapHeuristics = 0
Farfield/Plot/AngularWidthOne|double = -2.8115376802528
Farfield/Plot/AngularWidthTwo|double = 2.8115377809365
Farfield/Plot/ComplexComponent|string = Abs
Farfield/Plot/InfoText|string = Frequency = 0.27 THz\r\nMain lobe magnitude = 26 dBi\r\nMain lobe direction = 0.0 deg.\r\nAngular width (3 dB) = 5.6 deg.\r\nSide lobe level = -18.6 dB\r\n
Farfield/Plot/MainLobeDirection|double = 0
Farfield/Plot/Orientation|double = 180
Farfield/Plot/SideLobeRadius|double = 7.3610599897473
Farfield/Plot/Version|int = 20101010
Farfield/Polar/Quadrant1Left|double = 0
Farfield/Polar/Quadrant1Right|double = 90
Farfield/Polar/Quadrant2Left|double = 90
Farfield/Polar/Quadrant2Right|double = 180
Farfield/Polar/Quadrant3Left|double = -180
Farfield/Polar/Quadrant3Right|double = -90
Farfield/Polar/Quadrant4Left|double = -90
Farfield/Polar/Quadrant4Right|double = 0
180	-180	7.36106
181	-179	6.92521
182	-178	5.80359
183	-177	4.00736
184	-176	1.89728
185	-175	0.558315
186	-174	-1.3629
187	-173	-3.13427
188	-172	-5.98975
189	-171	-10.1582
190	-170	-12.2328
191	-169	-17.5992
192	-168	-23.1872
193	-167	-36.2127
194	-166	-25.6336
195	-165	-28.0466
196	-164	-33.8212
197	-163	-36.6734
198	-162	-30.8482
199	-161	-32.9338
200	-160	-41.3679
201	-159	-40.0675
202	-158	-37.3766
203	-157	-45.8983
204	-156	-58.8556
205	-155	-54.3996
206	-154	-59.2985
207	-153	-46.6191
208	-152	-50.1613
209	-151	-48.2132
210	-150	-48.9289
211	-149	-53.8716
212	-148	-45.2448
213	-147	-51.505
214	-146	-51.3383
215	-145	-49.7578
216	-144	-48.4761
217	-143	-50.5324
218	-142	-54.7862
219	-141	-47.9578
220	-140	-49.2565
221	-139	-52.8338
222	-138	-65.2499
223	-137	-42.3385
224	-136	-40.6496
225	-135	-44.3406
226	-134	-53.5655
227	-133	-47.8674
228	-132	-53.4378
229	-131	-54.5215
230	-130	-51.2522
231	-129	-57.5797
232	-128	-58.3369
233	-127	-60.9096
234	-126	-49.6972
235	-125	-56.5857
236	-124	-61.7418
237	-123	-49.7582
238	-122	-47.597
239	-121	-68.5297
240	-120	-60.2997
241	-119	-59.838
242	-118	-66.859
243	-117	-51.6251
244	-116	-54.569
245	-115	-63.5886
246	-114	-62.9925
247	-113	-61.7389
248	-112	-55.7117
249	-111	-59.4918
250	-110	-46.2518
251	-109	-63.894
252	-108	-48.0231
253	-107	-49.2171
254	-106	-44.1666
255	-105	-46.3004
256	-104	-44.5858
257	-103	-42.3277
258	-102	-46.4165
259	-101	-45.6224
260	-100	-43.7138
261	-99	-50.6558
262	-98	-39.3015
263	-97	-46.6189
264	-96	-44.9561
265	-95	-46.1683
266	-94	-51.6096
267	-93	-50.8396
268	-92	-49.7033
269	-91	-56.1198
270	-90	-43.2181
271	-89	-52.29
272	-88	-48.1996
273	-87	-43.0698
274	-86	-39.0264
275	-85	-39.2779
276	-84	-52.6293
277	-83	-35.5339
278	-82	-31.9987
279	-81	-24.87
280	-80	-42.3316
281	-79	-40.7117
282	-78	-38.2618
283	-77	-42.9594
284	-76	-42.9663
285	-75	-34.6346
286	-74	-32.7373
287	-73	-36.1574
288	-72	-42.2186
289	-71	-35.0969
290	-70	-33.6979
291	-69	-33.9174
292	-68	-31.2191
293	-67	-34.8472
294	-66	-33.8756
295	-65	-51.7818
296	-64	-39.668
297	-63	-32.4931
298	-62	-31.644
299	-61	-33.624
300	-60	-36.3893
301	-59	-43.559
302	-58	-47.6336
303	-57	-39.2193
304	-56	-38.0138
305	-55	-49.1967
306	-54	-33.0231
307	-53	-34.9075
308	-52	-38.8296
309	-51	-30.6111
310	-50	-35.0016
311	-49	-39.9973
312	-48	-62.6685
313	-47	-28.9797
314	-46	-30.4624
315	-45	-25.7059
316	-44	-31.8121
317	-43	-34.5637
318	-42	-33.9752
319	-41	-30.58
320	-40	-29.4509
321	-39	-29.5386
322	-38	-33.747
323	-37	-48.7993
324	-36	-32.3511
325	-35	-24.8044
326	-34	-26.2013
327	-33	-31.1981
328	-32	-44.0623
329	-31	-31.0563
330	-30	-22.5819
331	-29	-20.8528
332	-28	-22.3657
333	-27	-26.4905
334	-26	-27.9159
335	-25	-17.1732
336	-24	-16.6157
337	-23	-25.1308
338	-22	-11.475
339	-21	-16.4932
340	-20	-18.3514
341	-19	-17.7984
342	-18	-19.2664
343	-17	-14.8754
344	-16	-26.7921
345	-15	-9.07294
346	-14	-5.88066
347	-13	-9.18899
348	-12	1.06361
349	-11	3.14901
350	-10	6.90264
351	-9	10.8536
352	-8	13.4983
353	-7	15.8267
354	-6	17.8373
355	-5	19.1451
356	-4	20.6094
357	-3	22.6758
358	-2	24.2137
359	-1	25.4357
0	0	25.9657
1	1	25.4357
2	2	24.2137
3	3	22.6758
4	4	20.6094
5	5	19.1451
6	6	17.8373
7	7	15.8267
8	8	13.4983
9	9	10.8536
10	10	6.90265
11	11	3.149
12	12	1.06362
13	13	-9.18905
14	14	-5.88061
15	15	-9.07297
16	16	-26.7917
17	17	-14.8755
18	18	-19.2662
19	19	-17.7986
20	20	-18.3511
21	21	-16.4933
22	22	-11.4749
23	23	-25.1305
24	24	-16.6157
25	25	-17.1735
26	26	-27.9163
27	27	-26.4899
28	28	-22.3653
29	29	-20.8524
30	30	-22.5815
31	31	-31.0562
32	32	-44.0614
33	33	-31.1968
34	34	-26.2008
35	35	-24.8042
36	36	-32.3523
37	37	-48.7897
38	38	-33.7488
39	39	-29.5378
40	40	-29.45
41	41	-30.5787
42	42	-33.9763
43	43	-34.5652
44	44	-31.8118
45	45	-25.7058
46	46	-30.4618
47	47	-28.9801
48	48	-62.6401
49	49	-39.997
50	50	-35.0023
51	51	-30.6111
52	52	-38.8277
53	53	-34.9089
54	54	-33.0232
55	55	-49.1899
56	56	-38.0157
57	57	-39.2187
58	58	-47.6316
59	59	-43.5558
60	60	-36.3905
61	61	-33.6233
62	62	-31.6437
63	63	-32.4934
64	64	-39.6664
65	65	-51.7758
66	66	-33.8763
67	67	-34.8464
68	68	-31.2195
69	69	-33.9173
70	70	-33.6976
71	71	-35.0975
72	72	-42.2177
73	73	-36.1572
74	74	-32.7371
75	75	-34.6349
76	76	-42.9652
77	77	-42.9606
78	78	-38.2619
79	79	-40.7109
80	80	-42.3326
81	81	-24.8701
82	82	-31.9989
83	83	-35.5336
84	84	-52.6322
85	85	-39.2782
86	86	-39.0267
87	87	-43.0689
88	88	-48.1985
89	89	-52.292
90	90	-43.2178
91	91	-56.118
92	92	-49.7016
93	93	-50.8415
94	94	-51.608
95	95	-46.1679
96	96	-44.9566
97	97	-46.6197
98	98	-39.3019
99	99	-50.6552
100	100	-43.7145
101	101	-45.6216
102	102	-46.4175
103	103	-42.327
104	104	-44.5863
105	105	-46.2993
106	106	-44.1674
107	107	-49.2156
108	108	-48.0243
109	109	-63.8901
110	110	-46.2522
111	111	-59.4934
112	112	-55.711
113	113	-61.7436
114	114	-62.9992
115	115	-63.5864
116	116	-54.5705
117	117	-51.6233
118	118	-66.866
119	119	-59.8394
120	120	-60.2961
121	121	-68.52
122	122	-47.5964
123	123	-49.7578
124	124	-61.747
125	125	-56.5855
126	126	-49.6971
127	127	-60.9058
128	128	-58.3375
129	129	-57.5819
130	130	-51.2513
131	131	-54.5199
132	132	-53.4388
133	133	-47.8674
134	134	-53.5664
135	135	-44.3409
136	136	-40.6495
137	137	-42.3385
138	138	-65.2483
139	139	-52.8342
140	140	-49.2563
141	141	-47.9576
142	142	-54.7863
143	143	-50.5325
144	144	-48.4762
145	145	-49.7577
146	146	-51.3383
147	147	-51.5051
148	148	-45.2451
149	149	-53.8712
150	150	-48.9285
151	151	-48.2132
152	152	-50.1615
153	153	-46.6189
154	154	-59.2991
155	155	-54.3983
156	156	-58.857
157	157	-45.8987
158	158	-37.3765
159	159	-40.0677
160	160	-41.3677
161	161	-32.9339
162	162	-30.8482
163	163	-36.6733
164	164	-33.8213
165	165	-28.0466
166	166	-25.6336
167	167	-36.2129
168	168	-23.1872
169	169	-17.5992
170	170	-12.2328
171	171	-10.1582
172	172	-5.98975
173	173	-3.13426
174	174	-1.3629
175	175	0.558315
176	176	1.89728
177	177	4.00736
178	178	5.80359
179	179	6.92521
180	180	7.36106

## Sheet: 320 degree_5
CST XY Data Exchange Format V2
Title = Farfield Realized Gain Abs (Phi=0)
Xlabel = Theta / Degree
Ylabel = dBi
Curvelabel = farfield (f=0.32) [1]
Filename = ^farfield (f=0.32) [1].sig
Npoints = 361
Type = 8
Subtype = 15
Result type = farfield:cartesian
View type = Cartesian
Plot type = Real
Data/Title = Farfield Realized Gain Abs (Phi=0)
X/Label = Theta
X/Unit = deg
Y/Unit = dBi
Y/Logfactor = 10
Plot/wrapHeuristics = 0
Farfield/Plot/AngularWidthOne|double = -2.1417550757997
Farfield/Plot/AngularWidthTwo|double = 2.1417551257266
Farfield/Plot/ComplexComponent|string = Abs
Farfield/Plot/InfoText|string = Frequency = 0.32 THz\r\nMain lobe magnitude = 29 dBi\r\nMain lobe direction = 0.0 deg.\r\nAngular width (3 dB) = 4.3 deg.\r\nSide lobe level = -10.5 dB\r\n
Farfield/Plot/MainLobeDirection|double = 0
Farfield/Plot/Orientation|double = 180
Farfield/Plot/SideLobeRadius|double = 18.497292953635
Farfield/Plot/Version|int = 20101010
Farfield/Polar/Quadrant1Left|double = 0
Farfield/Polar/Quadrant1Right|double = 90
Farfield/Polar/Quadrant2Left|double = 90
Farfield/Polar/Quadrant2Right|double = 180
Farfield/Polar/Quadrant3Left|double = -180
Farfield/Polar/Quadrant3Right|double = -90
Farfield/Polar/Quadrant4Left|double = -90
Farfield/Polar/Quadrant4Right|double = 0
180	-180	18.4973
181	-179	18.0012
182	-178	15.9785
183	-177	12.0168
184	-176	6.78415
185	-175	3.1681
186	-174	-0.177709
187	-173	-11.8955
188	-172	-20.4905
189	-171	-17.8841
190	-170	-20.6914
191	-169	-21.6221
192	-168	-24.7279
193	-167	-27.2408
194	-166	-28.5843
195	-165	-33.277
196	-164	-31.7486
197	-163	-34.5968
198	-162	-56.4423
199	-161	-51.9493
200	-160	-37.7216
201	-159	-45.5844
202	-158	-53.2551
203	-157	-46.1833
204	-156	-51.1599
205	-155	-62.0736
206	-154	-45.4461
207	-153	-51.0729
208	-152	-49.7105
209	-151	-50.7516
210	-150	-50.7441
211	-149	-57.2617
212	-148	-51.4543
213	-147	-51.8526
214	-146	-61.2147
215	-145	-60.4732
216	-144	-60.8585
217	-143	-49.0723
218	-142	-49.587
219	-141	-55.4947
220	-140	-63.2764
221	-139	-55.5373
222	-138	-55.5189
223	-137	-53.2732
224	-136	-56.7149
225	-135	-62.7802
226	-134	-64.5705
227	-133	-72.8195
228	-132	-58.124
229	-131	-58.4145
230	-130	-57.4447
231	-129	-52.8074
232	-128	-57.5837
233	-127	-57.1598
234	-126	-61.2561
235	-125	-51.3327
236	-124	-55.1698
237	-123	-60.9415
238	-122	-61.0574
239	-121	-78.3941
240	-120	-63.1321
241	-119	-63.6403
242	-118	-51.9317
243	-117	-50.1416
244	-116	-49.0869
245	-115	-53.4217
246	-114	-54.902
247	-113	-51.5571
248	-112	-59.8929
249	-111	-52.5772
250	-110	-59.585
251	-109	-59.0743
252	-108	-54.5482
253	-107	-56.2512
254	-106	-54.509
255	-105	-69.513
256	-104	-71.8841
257	-103	-59.5423
258	-102	-69.1529
259	-101	-58.8273
260	-100	-57.9671
261	-99	-73.7049
262	-98	-72.1257
263	-97	-60.109
264	-96	-53.5052
265	-95	-56.2272
266	-94	-47.758
267	-93	-46.9213
268	-92	-55.2875
269	-91	-52.8588
270	-90	-49.8587
271	-89	-42.8626
272	-88	-44.26
273	-87	-41.665
274	-86	-52.3155
275	-85	-59.0541
276	-84	-49.6039
277	-83	-43.7548
278	-82	-38.5336
279	-81	-39.1271
280	-80	-42.9216
281	-79	-35.2414
282	-78	-34.7534
283	-77	-38.2342
284	-76	-35.2688
285	-75	-39.9803
286	-74	-35.7688
287	-73	-34.9464
288	-72	-36.4724
289	-71	-37.1261
290	-70	-33.6214
291	-69	-35.2608
292	-68	-36.0502
293	-67	-36.2396
294	-66	-44.6336
295	-65	-39.5297
296	-64	-35.7612
297	-63	-34.6146
298	-62	-31.9661
299	-61	-39.9601
300	-60	-47.3015
301	-59	-40.441
302	-58	-40.5081
303	-57	-43.8071
304	-56	-45.5428
305	-55	-44.8544
306	-54	-35.2025
307	-53	-32.3941
308	-52	-37.4884
309	-51	-46.2027
310	-50	-37.5776
311	-49	-38.6713
312	-48	-43.1408
313	-47	-35.6582
314	-46	-30.207
315	-45	-33.2249
316	-44	-35.5518
317	-43	-50.2374
318	-42	-31.265
319	-41	-32.8224
320	-40	-44.0834
321	-39	-33.3985
322	-38	-28.0592
323	-37	-32.6049
324	-36	-37.0487
325	-35	-36.602
326	-34	-33.0949
327	-33	-32.4234
328	-32	-28.0063
329	-31	-31.7998
330	-30	-36.5476
331	-29	-28.0347
332	-28	-23.4444
333	-27	-22.9248
334	-26	-33.2924
335	-25	-27.2439
336	-24	-27.9041
337	-23	-27.4066
338	-22	-25.0998
339	-21	-26.2613
340	-20	-20.679
341	-19	-30.9535
342	-18	-26.8388
343	-17	-22.1833
344	-16	-12.9406
345	-15	-18.8581
346	-14	-21.9284
347	-13	-18.0497
348	-12	-10.9226
349	-11	-11.6066
350	-10	-8.77993
351	-9	-7.56376
352	-8	-11.1598
353	-7	-1.80786
354	-6	10.2011
355	-5	13.8399
356	-4	17.4489
357	-3	22.6724
358	-2	26.5283
359	-1	28.4919
0	0	28.9818
1	1	28.4919
2	2	26.5284
3	3	22.6724
4	4	17.4489
5	5	13.8399
6	6	10.2011
7	7	-1.80787
8	8	-11.1598
9	9	-7.56378
10	10	-8.77992
11	11	-11.6066
12	12	-10.9227
13	13	-18.0499
14	14	-21.9279
15	15	-18.8578
16	16	-12.9408
17	17	-22.1831
18	18	-26.8399
19	19	-30.9527
20	20	-20.6784
21	21	-26.2623
22	22	-25.1007
23	23	-27.4074
24	24	-27.9027
25	25	-27.2426
26	26	-33.295
27	27	-22.9256
28	28	-23.4453
29	29	-28.036
30	30	-36.5491
31	31	-31.8017
32	32	-28.0059
33	33	-32.4245
34	34	-33.0968
35	35	-36.6043
36	36	-37.0523
37	37	-32.6069
38	38	-28.0581
39	39	-33.3979
40	40	-44.0812
41	41	-32.8232
42	42	-31.2663
43	43	-50.2444
44	44	-35.5518
45	45	-33.2249
46	46	-30.2075
47	47	-35.6563
48	48	-43.142
49	49	-38.669
50	50	-37.579
51	51	-46.2073
52	52	-37.487
53	53	-32.395
54	54	-35.2016
55	55	-44.8531
56	56	-45.5421
57	57	-43.806
58	58	-40.5093
59	59	-40.4405
60	60	-47.3018
61	61	-39.9601
62	62	-31.9663
63	63	-34.6144
64	64	-35.7612
65	65	-39.5299
66	66	-44.6334
67	67	-36.2396
68	68	-36.0502
69	69	-35.2607
70	70	-33.6214
71	71	-37.1262
72	72	-36.4722
73	73	-34.9461
74	74	-35.7689
75	75	-39.9809
76	76	-35.2689
77	77	-38.2338
78	78	-34.7531
79	79	-35.2416
80	80	-42.9226
81	81	-39.1277
82	82	-38.5333
83	83	-43.7536
84	84	-49.6026
85	85	-59.0608
86	86	-52.3169
87	87	-41.6658
88	88	-44.2595
89	89	-42.8617
90	90	-49.8567
91	91	-52.8569
92	92	-55.2911
93	93	-46.9207
94	94	-47.7571
95	95	-56.2237
96	96	-53.5066
97	97	-60.1058
98	98	-72.1434
99	99	-73.709
100	100	-57.9683
101	101	-58.8277
102	102	-69.1615
103	103	-59.54
104	104	-71.888
105	105	-69.5151
106	106	-54.5097
107	107	-56.2515
108	108	-54.5478
109	109	-59.0736
110	110	-59.5855
111	111	-52.5771
112	112	-59.8928
113	113	-51.5571
114	114	-54.902
115	115	-53.4218
116	116	-49.087
117	117	-50.1415
118	118	-51.9317
119	119	-63.6407
120	120	-63.132
121	121	-78.3923
122	122	-61.0575
123	123	-60.9414
124	124	-55.1699
125	125	-51.3325
126	126	-61.2551
127	127	-57.1603
128	128	-57.5826
129	129	-52.8075
130	130	-57.4465
131	131	-58.4123
132	132	-58.1222
133	133	-72.8284
134	134	-64.5773
135	135	-62.783
136	136	-56.7179
137	137	-53.2759
138	138	-55.5213
139	139	-55.533
140	140	-63.2655
141	141	-55.497
142	142	-49.5859
143	143	-49.0734
144	144	-60.8696
145	145	-60.4634
146	146	-61.2095
147	147	-51.8481
148	148	-51.4588
149	149	-57.2525
150	150	-50.7448
151	151	-50.7477
152	152	-49.7132
153	153	-51.0752
154	154	-45.4436
155	155	-62.0857
156	156	-51.1555
157	157	-46.1855
158	158	-53.258
159	159	-45.5844
160	160	-37.7207
161	161	-51.954
162	162	-56.4413
163	163	-34.5972
164	164	-31.749
165	165	-33.2766
166	166	-28.584
167	167	-27.2408
168	168	-24.7281
169	169	-21.622
170	170	-20.6914
171	171	-17.8841
172	172	-20.4905
173	173	-11.8955
174	174	-0.177704
175	175	3.16809
176	176	6.78415
177	177	12.0168
178	178	15.9785
179	179	18.0012
180	180	18.4973

## Sheet: 220_degree_15
CST XY Data Exchange Format V2
Title = Farfield Realized Gain Abs (Phi=0)
Xlabel = Theta / Degree
Ylabel = dBi
Curvelabel = farfield (f=0.22) [1]
Filename = ^farfield (f=0.22) [1].sig
Npoints = 361
Type = 8
Subtype = 15
Result type = farfield:cartesian
View type = Cartesian
Plot type = Real
Data/Title = Farfield Realized Gain Abs (Phi=0)
X/Label = Theta
X/Unit = deg
Y/Unit = dBi
Y/Logfactor = 10
Plot/wrapHeuristics = 0
Farfield/Plot/AngularWidthOne|double = -3.4732387060732
Farfield/Plot/AngularWidthTwo|double = 7.473239242458
Farfield/Plot/ComplexComponent|string = Abs
Farfield/Plot/InfoText|string = Frequency = 0.22 THz\r\nMain lobe magnitude = 22 dBi\r\nMain lobe direction = -2.0 deg.\r\nAngular width (3 dB) = 10.9 deg.\r\nSide lobe level = -27.1 dB\r\n
Farfield/Plot/MainLobeDirection|double = -2
Farfield/Plot/Orientation|double = 180
Farfield/Plot/SideLobeRadius|double = -5.0795797833404
Farfield/Plot/Version|int = 20101010
Farfield/Polar/Quadrant1Left|double = 0
Farfield/Polar/Quadrant1Right|double = 90
Farfield/Polar/Quadrant2Left|double = 90
Farfield/Polar/Quadrant2Right|double = 180
Farfield/Polar/Quadrant3Left|double = -180
Farfield/Polar/Quadrant3Right|double = -90
Farfield/Polar/Quadrant4Left|double = -90
Farfield/Polar/Quadrant4Right|double = 0
180	-180	-5.92524
181	-179	-5.21239
182	-178	-5.07958
183	-177	-6.59586
184	-176	-7.78616
185	-175	-8.23743
186	-174	-8.80776
187	-173	-9.60345
188	-172	-10.7706
189	-171	-12.6081
190	-170	-15.3428
191	-169	-18.1622
192	-168	-20.9609
193	-167	-24.913
194	-166	-28.0166
195	-165	-29.723
196	-164	-33.9105
197	-163	-42.0237
198	-162	-42.2936
199	-161	-42.9764
200	-160	-47.7186
201	-159	-48.1855
202	-158	-52.232
203	-157	-57.3744
204	-156	-66.9816
205	-155	-56.6267
206	-154	-60.959
207	-153	-53.9562
208	-152	-54.2121
209	-151	-61.5865
210	-150	-63.2391
211	-149	-64.5042
212	-148	-59.072
213	-147	-56.0906
214	-146	-65.1766
215	-145	-58.3422
216	-144	-58.7499
217	-143	-54.1059
218	-142	-63.9499
219	-141	-73.721
220	-140	-61.5579
221	-139	-71.2253
222	-138	-60.1952
223	-137	-58.5662
224	-136	-61.2139
225	-135	-60.9741
226	-134	-65.5098
227	-133	-62.4874
228	-132	-59.0143
229	-131	-59.7241
230	-130	-60.5594
231	-129	-59.119
232	-128	-59.1897
233	-127	-58.0908
234	-126	-63.7891
235	-125	-65.378
236	-124	-62.1082
237	-123	-57.8883
238	-122	-73.6969
239	-121	-79.4581
240	-120	-60.1963
241	-119	-61.3582
242	-118	-76.6357
243	-117	-61.5952
244	-116	-63.9957
245	-115	-66.5038
246	-114	-58.5959
247	-113	-60.1655
248	-112	-63.5781
249	-111	-62.1221
250	-110	-62.7196
251	-109	-65.5359
252	-108	-69.2611
253	-107	-69.9734
254	-106	-61.5695
255	-105	-59.3988
256	-104	-57.0683
257	-103	-54.9868
258	-102	-57.0575
259	-101	-57.41
260	-100	-57.969
261	-99	-59.8714
262	-98	-60.615
263	-97	-61.4353
264	-96	-61.2979
265	-95	-60.4653
266	-94	-64.209
267	-93	-63.296
268	-92	-59.3175
269	-91	-60.4343
270	-90	-58.4883
271	-89	-60.0192
272	-88	-61.925
273	-87	-61.8613
274	-86	-59.2079
275	-85	-66.0628
276	-84	-57.7913
277	-83	-59.1392
278	-82	-59.448
279	-81	-57.0272
280	-80	-61.1723
281	-79	-55.5565
282	-78	-52.5893
283	-77	-48.4445
284	-76	-49.7481
285	-75	-51.3722
286	-74	-50.429
287	-73	-51.3749
288	-72	-57.0931
289	-71	-53.7838
290	-70	-51.6737
291	-69	-46.5874
292	-68	-44.8288
293	-67	-48.5358
294	-66	-41.8609
295	-65	-38.6237
296	-64	-39.5913
297	-63	-40.4958
298	-62	-41.4646
299	-61	-43.1398
300	-60	-36.6081
301	-59	-40.243
302	-58	-37.6891
303	-57	-40.2438
304	-56	-40.9192
305	-55	-41.4055
306	-54	-41.377
307	-53	-54.0336
308	-52	-54.8736
309	-51	-40.0939
310	-50	-39.7191
311	-49	-41.2398
312	-48	-57.3796
313	-47	-36.1126
314	-46	-33.7471
315	-45	-43.0288
316	-44	-42.7911
317	-43	-39.4284
318	-42	-48.4467
319	-41	-33.619
320	-40	-44.6939
321	-39	-36.7187
322	-38	-33.1813
323	-37	-30.416
324	-36	-31.531
325	-35	-29.6186
326	-34	-44.1263
327	-33	-38.918
328	-32	-41.7127
329	-31	-31.9899
330	-30	-33.9102
331	-29	-25.5289
332	-28	-27.5597
333	-27	-27.6739
334	-26	-26.2605
335	-25	-35.4819
336	-24	-37.0194
337	-23	-26.8717
338	-22	-24.7287
339	-21	-18.0601
340	-20	-19.4259
341	-19	-21.2285
342	-18	-15.3287
343	-17	-10.9671
344	-16	-5.587
345	-15	-1.87559
346	-14	0.373157
347	-13	3.46478
348	-12	6.94336
349	-11	9.43594
350	-10	12.4157
351	-9	15.1106
352	-8	16.5527
353	-7	17.5516
354	-6	18.6424
355	-5	19.3708
356	-4	19.7009
357	-3	20.7064
358	-2	22.0261
359	-1	21.8622
0	0	21.0903
1	1	21.8622
2	2	22.0261
3	3	20.7064
4	4	19.7009
5	5	19.3708
6	6	18.6424
7	7	17.5516
8	8	16.5527
9	9	15.1107
10	10	12.4157
11	11	9.43593
12	12	6.94335
13	13	3.46477
14	14	0.373154
15	15	-1.87557
16	16	-5.58696
17	17	-10.9671
18	18	-15.3288
19	19	-21.2287
20	20	-19.4258
21	21	-18.06
22	22	-24.7284
23	23	-26.8717
24	24	-37.0201
25	25	-35.4835
26	26	-26.2611
27	27	-27.6732
28	28	-27.5596
29	29	-25.5293
30	30	-33.9113
31	31	-31.9888
32	32	-41.7127
33	33	-38.9202
34	34	-44.1299
35	35	-29.6196
36	36	-31.5301
37	37	-30.4153
38	38	-33.1828
39	39	-36.7184
40	40	-44.691
41	41	-33.6184
42	42	-48.4392
43	43	-39.4254
44	44	-42.7935
45	45	-43.0316
46	46	-33.7462
47	47	-36.1123
48	48	-57.3966
49	49	-41.2424
50	50	-39.7206
51	51	-40.0909
52	52	-54.8619
53	53	-54.0495
54	54	-41.3773
55	55	-41.4079
56	56	-40.9181
57	57	-40.2415
58	58	-37.6914
59	59	-40.24
60	60	-36.609
61	61	-43.1381
62	62	-41.4615
63	63	-40.4978
64	64	-39.5895
65	65	-38.6237
66	66	-41.8643
67	67	-48.5293
68	68	-44.8255
69	69	-46.5826
70	70	-51.6659
71	71	-53.7736
72	72	-57.1014
73	73	-51.3773
74	74	-50.4228
75	75	-51.3731
76	76	-49.7518
77	77	-48.4494
78	78	-52.5974
79	79	-55.5689
80	80	-61.1902
81	81	-57.0196
82	82	-59.4517
83	83	-59.1338
84	84	-57.784
85	85	-66.0534
86	86	-59.191
87	87	-61.8458
88	88	-61.9087
89	89	-60.0066
90	90	-58.4872
91	91	-60.4285
92	92	-59.3099
93	93	-63.2863
94	94	-64.1959
95	95	-60.4604
96	96	-61.2905
97	97	-61.4273
98	98	-60.6125
99	99	-59.8665
100	100	-57.9657
101	101	-57.4111
102	102	-57.057
103	103	-54.988
104	104	-57.0713
105	105	-59.3981
106	106	-61.573
107	107	-69.9689
108	108	-69.2356
109	109	-65.5139
110	110	-62.7094
111	111	-62.1136
112	112	-63.5682
113	113	-60.1625
114	114	-58.5938
115	115	-66.4997
116	116	-63.9914
117	117	-61.5849
118	118	-76.6088
119	119	-61.3477
120	120	-60.2024
121	121	-79.4399
122	122	-73.7095
123	123	-57.8825
124	124	-62.1088
125	125	-65.3845
126	126	-63.7877
127	127	-58.0856
128	128	-59.1883
129	129	-59.1234
130	130	-60.5574
131	131	-59.7209
132	132	-59.0151
133	133	-62.4934
134	134	-65.5177
135	135	-60.9746
136	136	-61.2127
137	137	-58.5631
138	138	-60.1918
139	139	-71.2368
140	140	-61.5613
141	141	-73.7338
142	142	-63.9494
143	143	-54.1062
144	144	-58.7502
145	145	-58.3408
146	146	-65.1742
147	147	-56.0906
148	148	-59.0723
149	149	-64.5055
150	150	-63.2395
151	151	-61.5867
152	152	-54.2122
153	153	-53.9564
154	154	-60.9588
155	155	-56.6266
156	156	-66.9816
157	157	-57.3744
158	158	-52.2319
159	159	-48.1854
160	160	-47.7186
161	161	-42.9764
162	162	-42.2936
163	163	-42.0237
164	164	-33.9105
165	165	-29.7229
166	166	-28.0166
167	167	-24.913
168	168	-20.9609
169	169	-18.1622
170	170	-15.3428
171	171	-12.6081
172	172	-10.7706
173	173	-9.60345
174	174	-8.80776
175	175	-8.23743
176	176	-7.78616
177	177	-6.59586
178	178	-5.07958
179	179	-5.21239
180	180	-5.92524

## Sheet: 270_degree_15
CST XY Data Exchange Format V2
Title = Farfield Realized Gain Abs (Phi=0)
Xlabel = Theta / Degree
Ylabel = dBi
Curvelabel = farfield (f=0.27) [1]
Filename = ^farfield (f=0.27) [1].sig
Npoints = 361
Type = 8
Subtype = 15
Result type = farfield:cartesian
View type = Cartesian
Plot type = Real
Data/Title = Farfield Realized Gain Abs (Phi=0)
X/Label = Theta
X/Unit = deg
Y/Unit = dBi
Y/Logfactor = 10
Plot/wrapHeuristics = 0
Farfield/Plot/AngularWidthOne|double = -3.1484820069332
Farfield/Plot/AngularWidthTwo|double = 3.1484819909347
Farfield/Plot/ComplexComponent|string = Abs
Farfield/Plot/InfoText|string = Frequency = 0.27 THz\r\nMain lobe magnitude = 25.2 dBi\r\nMain lobe direction = 0.0 deg.\r\nAngular width (3 dB) = 6.3 deg.\r\nSide lobe level = -21.4 dB\r\n
Farfield/Plot/MainLobeDirection|double = 0
Farfield/Plot/Orientation|double = 180
Farfield/Plot/SideLobeRadius|double = 3.7714865054076
Farfield/Plot/Version|int = 20101010
Farfield/Polar/Quadrant1Left|double = 0
Farfield/Polar/Quadrant1Right|double = 90
Farfield/Polar/Quadrant2Left|double = 90
Farfield/Polar/Quadrant2Right|double = 180
Farfield/Polar/Quadrant3Left|double = -180
Farfield/Polar/Quadrant3Right|double = -90
Farfield/Polar/Quadrant4Left|double = -90
Farfield/Polar/Quadrant4Right|double = 0
180	-180	3.77149
181	-179	2.43639
182	-178	1.06773
183	-177	0.930775
184	-176	0.469335
185	-175	-0.466985
186	-174	-2.6305
187	-173	-5.18702
188	-172	-7.79178
189	-171	-11.9545
190	-170	-16.5421
191	-169	-22.7255
192	-168	-29.053
193	-167	-28.6548
194	-166	-32.1638
195	-165	-31.2287
196	-164	-30.9428
197	-163	-30.8909
198	-162	-31.2828
199	-161	-33.5585
200	-160	-35.4361
201	-159	-39.2751
202	-158	-44.497
203	-157	-48.2497
204	-156	-49.5936
205	-155	-52.7932
206	-154	-47.4581
207	-153	-51.8635
208	-152	-48.7833
209	-151	-65.1762
210	-150	-64.5542
211	-149	-50.6317
212	-148	-55.3235
213	-147	-52.0463
214	-146	-56.7347
215	-145	-52.0929
216	-144	-51.1398
217	-143	-55.9882
218	-142	-51.1585
219	-141	-53.9306
220	-140	-65.1971
221	-139	-53.8673
222	-138	-55.9924
223	-137	-54.4665
224	-136	-60.7768
225	-135	-55.5857
226	-134	-56.0544
227	-133	-56.6694
228	-132	-54.4982
229	-131	-53.4698
230	-130	-74.1144
231	-129	-56.3955
232	-128	-77.5104
233	-127	-66.1348
234	-126	-60.0482
235	-125	-58.8728
236	-124	-61.3838
237	-123	-55.2886
238	-122	-53.4218
239	-121	-63.1482
240	-120	-72.754
241	-119	-77.3438
242	-118	-61.0174
243	-117	-53.3376
244	-116	-54.79
245	-115	-54.5963
246	-114	-57.1997
247	-113	-57.1126
248	-112	-60.8683
249	-111	-58.6349
250	-110	-66.3941
251	-109	-66.4363
252	-108	-64.7461
253	-107	-57.9831
254	-106	-57.6682
255	-105	-70.8123
256	-104	-58.1815
257	-103	-53.6969
258	-102	-55.8771
259	-101	-59.2724
260	-100	-69.717
261	-99	-55.4356
262	-98	-54.2245
263	-97	-64.6215
264	-96	-62.6043
265	-95	-57.6814
266	-94	-53.2201
267	-93	-58.1186
268	-92	-69.7341
269	-91	-61.1921
270	-90	-52.7916
271	-89	-53.5599
272	-88	-65.8763
273	-87	-65.2497
274	-86	-55.3155
275	-85	-54.6025
276	-84	-52.2841
277	-83	-51.7065
278	-82	-70.1278
279	-81	-57.8647
280	-80	-46.0623
281	-79	-47.5149
282	-78	-53.5862
283	-77	-51.3772
284	-76	-44.8564
285	-75	-45.1055
286	-74	-41.2991
287	-73	-42.6942
288	-72	-41.1278
289	-71	-39.8866
290	-70	-45.1986
291	-69	-40.2677
292	-68	-39.4694
293	-67	-41.2203
294	-66	-42.9997
295	-65	-37.9216
296	-64	-44.4628
297	-63	-41.2047
298	-62	-39.8401
299	-61	-36.6536
300	-60	-36.5976
301	-59	-36.2874
302	-58	-32.938
303	-57	-32.6959
304	-56	-35.9014
305	-55	-39.2081
306	-54	-43.2494
307	-53	-38.0276
308	-52	-37.5397
309	-51	-38.8274
310	-50	-33.655
311	-49	-39.7337
312	-48	-38.2179
313	-47	-37.9778
314	-46	-31.5494
315	-45	-28.8923
316	-44	-30.0736
317	-43	-32.6793
318	-42	-28.9666
319	-41	-24.8767
320	-40	-33.2244
321	-39	-34.5767
322	-38	-28.2842
323	-37	-29.5032
324	-36	-44.8435
325	-35	-30.6303
326	-34	-31.0129
327	-33	-28.4591
328	-32	-27.9689
329	-31	-36.5506
330	-30	-44.7951
331	-29	-27.5862
332	-28	-20.8779
333	-27	-22.9867
334	-26	-22.6718
335	-25	-27.5897
336	-24	-18.791
337	-23	-21.4998
338	-22	-18.4329
339	-21	-18.2965
340	-20	-12.6457
341	-19	-11.2704
342	-18	-8.07294
343	-17	-7.8814
344	-16	-8.1377
345	-15	-9.22242
346	-14	-10.9032
347	-13	-5.73951
348	-12	-6.11276
349	-11	-1.60885
350	-10	5.25952
351	-9	10.2624
352	-8	13.5281
353	-7	16.4637
354	-6	19.0731
355	-5	21.0597
356	-4	21.7828
357	-3	22.264
358	-2	22.4629
359	-1	23.8549
0	0	25.1926
1	1	23.8549
2	2	22.4629
3	3	22.264
4	4	21.7828
5	5	21.0597
6	6	19.0731
7	7	16.4637
8	8	13.5282
9	9	10.2624
10	10	5.25951
11	11	-1.60887
12	12	-6.11281
13	13	-5.73956
14	14	-10.9033
15	15	-9.22241
16	16	-8.13763
17	17	-7.88133
18	18	-8.07299
19	19	-11.2705
20	20	-12.6456
21	21	-18.2962
22	22	-18.433
23	23	-21.4998
24	24	-18.7907
25	25	-27.5895
26	26	-22.6712
27	27	-22.9865
28	28	-20.8784
29	29	-27.5864
30	30	-44.7993
31	31	-36.5537
32	32	-27.9698
33	33	-28.4581
34	34	-31.0124
35	35	-30.632
36	36	-44.8476
37	37	-29.5029
38	38	-28.2836
39	39	-34.5783
40	40	-33.2256
41	41	-24.8766
42	42	-28.9669
43	43	-32.6772
44	44	-30.0752
45	45	-28.891
46	46	-31.551
47	47	-37.9775
48	48	-38.2143
49	49	-39.7302
50	50	-33.6562
51	51	-38.8313
52	52	-37.5365
53	53	-38.0242
54	54	-43.2452
55	55	-39.2074
56	56	-35.8998
57	57	-32.6947
58	58	-32.9369
59	59	-36.2855
60	60	-36.5954
61	61	-36.6519
62	62	-39.8368
63	63	-41.2006
64	64	-44.4639
65	65	-37.9238
66	66	-43.0043
67	67	-41.2188
68	68	-39.4664
69	69	-40.266
70	70	-45.2038
71	71	-39.8874
72	72	-41.1255
73	73	-42.6924
74	74	-41.3011
75	75	-45.1089
76	76	-44.8541
77	77	-51.3688
78	78	-53.5845
79	79	-47.5094
80	80	-46.0575
81	81	-57.8473
82	82	-70.061
83	83	-51.6996
84	84	-52.2757
85	85	-54.5933
86	86	-55.3078
87	87	-65.2341
88	88	-65.8434
89	89	-53.5509
90	90	-52.7838
91	91	-61.1845
92	92	-69.7766
93	93	-58.1045
94	94	-53.2119
95	95	-57.6711
96	96	-62.6182
97	97	-64.6157
98	98	-54.2175
99	99	-55.4263
100	100	-69.6691
101	101	-59.2752
102	102	-55.8702
103	103	-53.6896
104	104	-58.1728
105	105	-70.767
106	106	-57.6617
107	107	-57.9733
108	108	-64.7285
109	109	-66.4443
110	110	-66.3861
111	111	-58.6321
112	112	-60.8797
113	113	-57.1183
114	114	-57.1939
115	115	-54.5905
116	116	-54.7904
117	117	-53.342
118	118	-61.0291
119	119	-77.4015
120	120	-72.7582
121	121	-63.1463
122	122	-53.4236
123	123	-55.2937
124	124	-61.3777
125	125	-58.8674
126	126	-60.0511
127	127	-66.1302
128	128	-77.5086
129	129	-56.3914
130	130	-74.1229
131	131	-53.4679
132	132	-54.4995
133	133	-56.669
134	134	-56.053
135	135	-55.5842
136	136	-60.7807
137	137	-54.4681
138	138	-55.9909
139	139	-53.8666
140	140	-65.1975
141	141	-53.9308
142	142	-51.1588
143	143	-55.9874
144	144	-51.1395
145	145	-52.0926
146	146	-56.7348
147	147	-52.0464
148	148	-55.3236
149	149	-50.6318
150	150	-64.5548
151	151	-65.1758
152	152	-48.7836
153	153	-51.8634
154	154	-47.4579
155	155	-52.7939
156	156	-49.5937
157	157	-48.2499
158	158	-44.4972
159	159	-39.275
160	160	-35.4361
161	161	-33.5586
162	162	-31.2828
163	163	-30.8909
164	164	-30.9427
165	165	-31.2287
166	166	-32.1638
167	167	-28.6548
168	168	-29.053
169	169	-22.7255
170	170	-16.5421
171	171	-11.9545
172	172	-7.79177
173	173	-5.18702
174	174	-2.6305
175	175	-0.466984
176	176	0.469336
177	177	0.930775
178	178	1.06773
179	179	2.43639
180	180	3.77149

## Sheet: 320_degree_15
CST XY Data Exchange Format V2
Title = Farfield Realized Gain Abs (Phi=0)
Xlabel = Theta / Degree
Ylabel = dBi
Curvelabel = farfield (f=0.32) [1]
Filename = ^farfield (f=0.32) [1].sig
Npoints = 361
Type = 8
Subtype = 15
Result type = farfield:cartesian
View type = Cartesian
Plot type = Real
Data/Title = Farfield Realized Gain Abs (Phi=0)
X/Label = Theta
X/Unit = deg
Y/Unit = dBi
Y/Logfactor = 10
Plot/wrapHeuristics = 0
Farfield/Plot/AngularWidthOne|double = -2.2382439595102
Farfield/Plot/AngularWidthTwo|double = 2.2382439252885
Farfield/Plot/ComplexComponent|string = Abs
Farfield/Plot/InfoText|string = Frequency = 0.32 THz\r\nMain lobe magnitude = 28.6 dBi\r\nMain lobe direction = 0.0 deg.\r\nAngular width (3 dB) = 4.5 deg.\r\nSide lobe level = -19.7 dB\r\n
Farfield/Plot/MainLobeDirection|double = 0
Farfield/Plot/Orientation|double = 180
Farfield/Plot/SideLobeRadius|double = 8.8633262762148
Farfield/Plot/Version|int = 20101010
Farfield/Polar/Quadrant1Left|double = 0
Farfield/Polar/Quadrant1Right|double = 90
Farfield/Polar/Quadrant2Left|double = 90
Farfield/Polar/Quadrant2Right|double = 180
Farfield/Polar/Quadrant3Left|double = -180
Farfield/Polar/Quadrant3Right|double = -90
Farfield/Polar/Quadrant4Left|double = -90
Farfield/Polar/Quadrant4Right|double = 0
180	-180	8.86333
181	-179	7.68591
182	-178	6.36648
183	-177	4.22815
184	-176	1.81534
185	-175	-1.66485
186	-174	-6.62632
187	-173	-13.884
188	-172	-17.1057
189	-171	-13.6834
190	-170	-12.31
191	-169	-14.123
192	-168	-17.2807
193	-167	-21.0733
194	-166	-26.1801
195	-165	-28.3461
196	-164	-28.1096
197	-163	-30.682
198	-162	-36.7697
199	-161	-40.0527
200	-160	-46.0574
201	-159	-43.1162
202	-158	-42.0809
203	-157	-39.0435
204	-156	-42.2796
205	-155	-39.2317
206	-154	-41.9818
207	-153	-43.6508
208	-152	-49.7213
209	-151	-56.4161
210	-150	-50.517
211	-149	-59.0978
212	-148	-53.6894
213	-147	-52.7131
214	-146	-57.1309
215	-145	-49.9356
216	-144	-52.3983
217	-143	-52.5426
218	-142	-53.7756
219	-141	-47.4365
220	-140	-49.0906
221	-139	-49.9199
222	-138	-65.1892
223	-137	-51.2007
224	-136	-57.5572
225	-135	-52.0896
226	-134	-56.5259
227	-133	-65.6073
228	-132	-54.2773
229	-131	-57.0091
230	-130	-58.4237
231	-129	-56.2431
232	-128	-57.0348
233	-127	-61.8503
234	-126	-68.9381
235	-125	-64.7331
236	-124	-69.0466
237	-123	-66.7604
238	-122	-65.2445
239	-121	-74.2236
240	-120	-68.4549
241	-119	-69.1539
242	-118	-62.2898
243	-117	-61.4172
244	-116	-59.3483
245	-115	-56.6904
246	-114	-54.0978
247	-113	-61.1124
248	-112	-61.3585
249	-111	-56.2219
250	-110	-52.6938
251	-109	-51.7653
252	-108	-53.5608
253	-107	-56.8328
254	-106	-57.9525
255	-105	-58.4723
256	-104	-60.1747
257	-103	-59.161
258	-102	-58.1362
259	-101	-61.2369
260	-100	-58.4332
261	-99	-58.9196
262	-98	-59.4987
263	-97	-57.8581
264	-96	-59.7372
265	-95	-62.2921
266	-94	-62.0382
267	-93	-62.4349
268	-92	-69.4556
269	-91	-66.0651
270	-90	-63.4533
271	-89	-63.9247
272	-88	-62.9467
273	-87	-57.6139
274	-86	-60.5678
275	-85	-60.2871
276	-84	-55.6644
277	-83	-53.5581
278	-82	-54.6963
279	-81	-53.8008
280	-80	-49.9856
281	-79	-58.2438
282	-78	-54.9073
283	-77	-49.3836
284	-76	-58.1571
285	-75	-62.8615
286	-74	-48.5281
287	-73	-48.3088
288	-72	-48.3525
289	-71	-48.8646
290	-70	-44.3909
291	-69	-58.3836
292	-68	-45.2394
293	-67	-45.2206
294	-66	-54.5771
295	-65	-44.2622
296	-64	-50.181
297	-63	-42.0109
298	-62	-46.658
299	-61	-48.826
300	-60	-50.2033
301	-59	-40.3635
302	-58	-41.0802
303	-57	-37.9059
304	-56	-40.4892
305	-55	-48.0361
306	-54	-43.2553
307	-53	-38.3613
308	-52	-38.52
309	-51	-38.7382
310	-50	-43.0929
311	-49	-38.7284
312	-48	-38.4715
313	-47	-35.5112
314	-46	-33.8875
315	-45	-34.4968
316	-44	-34.2589
317	-43	-37.5047
318	-42	-41.4838
319	-41	-38.9305
320	-40	-35.3311
321	-39	-39.3175
322	-38	-34.3376
323	-37	-32.7348
324	-36	-32.7613
325	-35	-38.7806
326	-34	-40.3271
327	-33	-42.9736
328	-32	-57.1304
329	-31	-38.779
330	-30	-35.2866
331	-29	-34.27
332	-28	-37.235
333	-27	-28.5553
334	-26	-21.6787
335	-25	-20.7446
336	-24	-20.6682
337	-23	-19.4046
338	-22	-21.8311
339	-21	-25.9954
340	-20	-26.588
341	-19	-22.4004
342	-18	-17.8535
343	-17	-11.1311
344	-16	-8.50165
345	-15	-8.6544
346	-14	-6.21326
347	-13	-2.0896
348	-12	2.87205
349	-11	5.10403
350	-10	7.35228
351	-9	5.68179
352	-8	2.53653
353	-7	6.08185
354	-6	13.088
355	-5	17.8236
356	-4	21.43
357	-3	23.9206
358	-2	26.0809
359	-1	27.3915
0	0	28.5662
1	1	27.3915
2	2	26.0809
3	3	23.9206
4	4	21.43
5	5	17.8236
6	6	13.088
7	7	6.08185
8	8	2.5365
9	9	5.68179
10	10	7.35229
11	11	5.10404
12	12	2.87203
13	13	-2.08963
14	14	-6.21316
15	15	-8.6543
16	16	-8.50176
17	17	-11.1312
18	18	-17.8533
19	19	-22.3998
20	20	-26.5894
21	21	-25.9944
22	22	-21.8308
23	23	-19.4052
24	24	-20.6676
25	25	-20.7448
26	26	-21.6791
27	27	-28.5533
28	28	-37.2406
29	29	-34.2725
30	30	-35.282
31	31	-38.7857
32	32	-57.1791
33	33	-42.9634
34	34	-40.3354
35	35	-38.7757
36	36	-32.7626
37	37	-32.7332
38	38	-34.3355
39	39	-39.3116
40	40	-35.3344
41	41	-38.9319
42	42	-41.4912
43	43	-37.5093
44	44	-34.2624
45	45	-34.499
46	46	-33.8896
47	47	-35.5143
48	48	-38.4719
49	49	-38.7248
50	50	-43.093
51	51	-38.7429
52	52	-38.5222
53	53	-38.358
54	54	-43.2503
55	55	-48.0492
56	56	-40.4845
57	57	-37.9035
58	58	-41.0852
59	59	-40.3605
60	60	-50.1956
61	61	-48.8146
62	62	-46.6645
63	63	-42.01
64	64	-50.1867
65	65	-44.2606
66	66	-54.5947
67	67	-45.2168
68	68	-45.2436
69	69	-58.3983
70	70	-44.3937
71	71	-48.8688
72	72	-48.3526
73	73	-48.3058
74	74	-48.5275
75	75	-62.8909
76	76	-58.1478
77	77	-49.3877
78	78	-54.918
79	79	-58.2411
80	80	-49.9854
81	81	-53.8062
82	82	-54.6899
83	83	-53.5565
84	84	-55.6648
85	85	-60.2842
86	86	-60.5556
87	87	-57.6137
88	88	-62.96
89	89	-63.9142
90	90	-63.4526
91	91	-66.0701
92	92	-69.4293
93	93	-62.4226
94	94	-62.0297
95	95	-62.2821
96	96	-59.7327
97	97	-57.8562
98	98	-59.4991
99	99	-58.9217
100	100	-58.438
101	101	-61.2444
102	102	-58.1419
103	103	-59.1672
104	104	-60.1793
105	105	-58.4752
106	106	-57.952
107	107	-56.8304
108	108	-53.5595
109	109	-51.7656
110	110	-52.697
111	111	-56.2289
112	112	-61.3717
113	113	-61.1126
114	114	-54.0992
115	115	-56.6948
116	116	-59.3553
117	117	-61.4217
118	118	-62.2973
119	119	-69.1834
120	120	-68.4443
121	121	-74.2512
122	122	-65.2564
123	123	-66.7645
124	124	-69.0677
125	125	-64.7276
126	126	-68.9352
127	127	-61.8492
128	128	-57.0325
129	129	-56.242
130	130	-58.4291
131	131	-57.0043
132	132	-54.2766
133	133	-65.6165
134	134	-56.5245
135	135	-52.0908
136	136	-57.5542
137	137	-51.2017
138	138	-65.1892
139	139	-49.9208
140	140	-49.0913
141	141	-47.4369
142	142	-53.7763
143	143	-52.5431
144	144	-52.3981
145	145	-49.9359
146	146	-57.1315
147	147	-52.7131
148	148	-53.6902
149	149	-59.0983
150	150	-50.5161
151	151	-56.4149
152	152	-49.722
153	153	-43.6502
154	154	-41.9819
155	155	-39.2319
156	156	-42.2791
157	157	-39.0439
158	158	-42.0805
159	159	-43.1157
160	160	-46.0585
161	161	-40.0523
162	162	-36.7695
163	163	-30.6822
164	164	-28.1097
165	165	-28.3461
166	166	-26.18
167	167	-21.0734
168	168	-17.2807
169	169	-14.1229
170	170	-12.31
171	171	-13.6834
172	172	-17.1057
173	173	-13.884
174	174	-6.62632
175	175	-1.66484
176	176	1.81534
177	177	4.22815
178	178	6.36648
179	179	7.68591
180	180	8.86333

## Sheet: 220_degree_30
CST XY Data Exchange Format V2
Title = Farfield Realized Gain Abs (Phi=1)
Xlabel = Theta / Degree
Ylabel = dBi
Curvelabel = farfield (f=0.22) [1]
Filename = ^farfield (f=0.22) [1].sig
Npoints = 361
Type = 8
Subtype = 15
Result type = farfield:cartesian
View type = Cartesian
Plot type = Real
Data/Title = Farfield Realized Gain Abs (Phi=1)
X/Label = Theta
X/Unit = deg
Y/Unit = dBi
Y/Logfactor = 10
Plot/wrapHeuristics = 0
Farfield/Plot/AngularWidthOne|double = -5.6994425673329
Farfield/Plot/AngularWidthTwo|double = 9.6994440346216
Farfield/Plot/ComplexComponent|string = Abs
Farfield/Plot/InfoText|string = Frequency = 0.22 THz\r\nMain lobe magnitude = 20.2 dBi\r\nMain lobe direction = -2.0 deg.\r\nAngular width (3 dB) = 15.4 deg.\r\nSide lobe level = -27.2 dB\r\n
Farfield/Plot/MainLobeDirection|double = -2
Farfield/Plot/Orientation|double = 180
Farfield/Plot/SideLobeRadius|double = -7.0229930296879
Farfield/Plot/Version|int = 20101010
Farfield/Polar/Quadrant1Left|double = 0
Farfield/Polar/Quadrant1Right|double = 90
Farfield/Polar/Quadrant2Left|double = 90
Farfield/Polar/Quadrant2Right|double = 180
Farfield/Polar/Quadrant3Left|double = -180
Farfield/Polar/Quadrant3Right|double = -90
Farfield/Polar/Quadrant4Left|double = -90
Farfield/Polar/Quadrant4Right|double = 0
180	-180	-8.07778
181	-179	-7.54649
182	-178	-7.02299
183	-177	-7.0803
184	-176	-7.11925
185	-175	-7.62438
186	-174	-8.15086
187	-173	-9.30468
188	-172	-10.7446
189	-171	-11.9634
190	-170	-13.8589
191	-169	-16.3889
192	-168	-18.9975
193	-167	-23.2097
194	-166	-29.3351
195	-165	-34.9765
196	-164	-42.3904
197	-163	-37.9227
198	-162	-38.3896
199	-161	-39.1173
200	-160	-38.7436
201	-159	-42.0822
202	-158	-50.4279
203	-157	-49.5726
204	-156	-50.3722
205	-155	-50.3973
206	-154	-44.3469
207	-153	-44.9057
208	-152	-46.3171
209	-151	-44.5168
210	-150	-46.1855
211	-149	-45.7053
212	-148	-50.0043
213	-147	-47.5728
214	-146	-51.8529
215	-145	-53.0819
216	-144	-54.6668
217	-143	-54.7838
218	-142	-58.9346
219	-141	-60.6259
220	-140	-64.8699
221	-139	-56.0901
222	-138	-57.739
223	-137	-59.6169
224	-136	-61.703
225	-135	-63.055
226	-134	-61.6642
227	-133	-60.9301
228	-132	-60.4392
229	-131	-62.0068
230	-130	-55.6549
231	-129	-61.9834
232	-128	-59.0272
233	-127	-59.5747
234	-126	-54.7797
235	-125	-56.6147
236	-124	-60.1299
237	-123	-55.0044
238	-122	-58.9448
239	-121	-56.1532
240	-120	-60.4359
241	-119	-61.4598
242	-118	-59.4511
243	-117	-59.9196
244	-116	-54.4329
245	-115	-60.3818
246	-114	-54.8923
247	-113	-63.8889
248	-112	-51.0261
249	-111	-58.1371
250	-110	-60.2707
251	-109	-60.7836
252	-108	-54.8121
253	-107	-52.9846
254	-106	-55.5213
255	-105	-59.8072
256	-104	-54.6596
257	-103	-56.5688
258	-102	-55.5501
259	-101	-54.3772
260	-100	-59.5423
261	-99	-53.2714
262	-98	-59.0586
263	-97	-56.5171
264	-96	-53.5454
265	-95	-54.965
266	-94	-53.5028
267	-93	-55.9624
268	-92	-56.5391
269	-91	-55.9838
270	-90	-52.9528
271	-89	-53.3208
272	-88	-51.8893
273	-87	-53.0992
274	-86	-49.7183
275	-85	-51.1401
276	-84	-51.9268
277	-83	-48.3903
278	-82	-47.6661
279	-81	-47.1679
280	-80	-50.0638
281	-79	-52.3177
282	-78	-49.462
283	-77	-45.9773
284	-76	-51.9631
285	-75	-44.4788
286	-74	-47.1113
287	-73	-43.9945
288	-72	-51.3323
289	-71	-47.2731
290	-70	-47.0922
291	-69	-42.2623
292	-68	-46.9135
293	-67	-39.8747
294	-66	-46.1989
295	-65	-41.1992
296	-64	-37.6737
297	-63	-40.6693
298	-62	-42.42
299	-61	-43.8162
300	-60	-43.5605
301	-59	-39.9107
302	-58	-48.0995
303	-57	-39.0217
304	-56	-39.9573
305	-55	-49.1619
306	-54	-36.9377
307	-53	-34.6371
308	-52	-39.5442
309	-51	-36.4959
310	-50	-40.2734
311	-49	-45.1979
312	-48	-42.6236
313	-47	-36.9077
314	-46	-39.6001
315	-45	-34.679
316	-44	-36.4116
317	-43	-37.1672
318	-42	-33.2065
319	-41	-40.4037
320	-40	-41.0635
321	-39	-28.4349
322	-38	-27.2574
323	-37	-29.7097
324	-36	-26.5019
325	-35	-26.4695
326	-34	-25.7532
327	-33	-25.0457
328	-32	-20.3256
329	-31	-17.4286
330	-30	-17.4114
331	-29	-18.604
332	-28	-16.7122
333	-27	-17.2349
334	-26	-18.6626
335	-25	-23.9526
336	-24	-26.5574
337	-23	-21.9399
338	-22	-17.7525
339	-21	-15.789
340	-20	-12.3388
341	-19	-10.8494
342	-18	-11.5968
343	-17	-14.3997
344	-16	-15.3673
345	-15	-7.71573
346	-14	-0.545767
347	-13	5.16927
348	-12	8.69006
349	-11	11.5362
350	-10	13.8735
351	-9	15.5206
352	-8	16.8042
353	-7	18.1543
354	-6	19.2604
355	-5	19.714
356	-4	20.1546
357	-3	20.1568
358	-2	20.21
359	-1	19.7153
0	0	19.2233
1	1	19.7153
2	2	20.21
3	3	20.1568
4	4	20.1546
5	5	19.714
6	6	19.2604
7	7	18.1543
8	8	16.8042
9	9	15.5206
10	10	13.8735
11	11	11.5362
12	12	8.69005
13	13	5.16927
14	14	-0.54575
15	15	-7.71568
16	16	-15.3674
17	17	-14.3997
18	18	-11.5967
19	19	-10.8494
20	20	-12.3389
21	21	-15.7891
22	22	-17.7523
23	23	-21.9398
24	24	-26.5581
25	25	-23.9531
26	26	-18.6625
27	27	-17.2346
28	28	-16.7122
29	29	-18.6043
30	30	-17.4111
31	31	-17.4285
32	32	-20.326
33	33	-25.0452
34	34	-25.7531
35	35	-26.4704
36	36	-26.5016
37	37	-29.7088
38	38	-27.2583
39	39	-28.435
40	40	-41.0625
41	41	-40.4061
42	42	-33.2064
43	43	-37.1658
44	44	-36.4112
45	45	-34.6804
46	46	-39.597
47	47	-36.9056
48	48	-42.626
49	49	-45.2016
50	50	-40.2708
51	51	-36.498
52	52	-39.5415
53	53	-34.638
54	54	-36.9367
55	55	-49.161
56	56	-39.9597
57	57	-39.0197
58	58	-48.0996
59	59	-39.912
60	60	-43.5571
61	61	-43.815
62	62	-42.4219
63	63	-40.6682
64	64	-37.6723
65	65	-41.2011
66	66	-46.1988
67	67	-39.8738
68	68	-46.9104
69	69	-42.2602
70	70	-47.0947
71	71	-47.2748
72	72	-51.3285
73	73	-43.9933
74	74	-47.109
75	75	-44.4762
76	76	-51.9619
77	77	-45.9777
78	78	-49.4603
79	79	-52.3225
80	80	-50.0609
81	81	-47.1674
82	82	-47.6648
83	83	-48.3883
84	84	-51.9241
85	85	-51.1375
86	86	-49.7158
87	87	-53.096
88	88	-51.8863
89	89	-53.3175
90	90	-52.9504
91	91	-55.9791
92	92	-56.5352
93	93	-55.9569
94	94	-53.5
95	95	-54.9612
96	96	-53.5414
97	97	-56.5138
98	98	-59.0513
99	99	-53.2685
100	100	-59.5442
101	101	-54.3734
102	102	-55.5507
103	103	-56.568
104	104	-54.6551
105	105	-59.8009
106	106	-55.5168
107	107	-52.9824
108	108	-54.8109
109	109	-60.7807
110	110	-60.2728
111	111	-58.1315
112	112	-51.0241
113	113	-63.8876
114	114	-54.8889
115	115	-60.3853
116	116	-54.4298
117	117	-59.9147
118	118	-59.4451
119	119	-61.4585
120	120	-60.4372
121	121	-56.1506
122	122	-58.9492
123	123	-55.0044
124	124	-60.135
125	125	-56.6131
126	126	-54.7818
127	127	-59.5764
128	128	-59.0304
129	129	-61.9847
130	130	-55.6567
131	131	-62.0018
132	132	-60.4393
133	133	-60.9261
134	134	-61.6653
135	135	-63.0483
136	136	-61.702
137	137	-59.6159
138	138	-57.74
139	139	-56.0897
140	140	-64.8743
141	141	-60.6244
142	142	-58.9348
143	143	-54.7835
144	144	-54.6665
145	145	-53.081
146	146	-51.8536
147	147	-47.5731
148	148	-50.0039
149	149	-45.7053
150	150	-46.1856
151	151	-44.5167
152	152	-46.3171
153	153	-44.9058
154	154	-44.347
155	155	-50.3973
156	156	-50.3722
157	157	-49.5726
158	158	-50.4279
159	159	-42.0823
160	160	-38.7436
161	161	-39.1173
162	162	-38.3896
163	163	-37.9227
164	164	-42.3905
165	165	-34.9765
166	166	-29.3351
167	167	-23.2097
168	168	-18.9975
169	169	-16.3889
170	170	-13.8589
171	171	-11.9633
172	172	-10.7446
173	173	-9.30468
174	174	-8.15086
175	175	-7.62438
176	176	-7.11925
177	177	-7.0803
178	178	-7.02299
179	179	-7.54649
180	180	-8.07778

## Sheet: 270_degree_30
CST XY Data Exchange Format V2
Title = Farfield Realized Gain Abs (Phi=1)
Xlabel = Theta / Degree
Ylabel = dBi
Curvelabel = farfield (f=0.2725) [1]
Filename = ^farfield (f=0.2725) [1].sig
Npoints = 361
Type = 8
Subtype = 15
Result type = farfield:cartesian
View type = Cartesian
Plot type = Real
Data/Title = Farfield Realized Gain Abs (Phi=1)
X/Label = Theta
X/Unit = deg
Y/Unit = dBi
Y/Logfactor = 10
Plot/wrapHeuristics = 0
Farfield/Plot/AngularWidthOne|double = -5.5114319169948
Farfield/Plot/AngularWidthTwo|double = 5.5114330540734
Farfield/Plot/ComplexComponent|string = Abs
Farfield/Plot/InfoText|string = Frequency = 0.2725 THz\r\nMain lobe magnitude = 22.1 dBi\r\nMain lobe direction = 0.0 deg.\r\nAngular width (3 dB) = 11.0 deg.\r\nSide lobe level = -21.2 dB\r\n
Farfield/Plot/MainLobeDirection|double = 0
Farfield/Plot/Orientation|double = 180
Farfield/Plot/SideLobeRadius|double = 0.90168023563595
Farfield/Plot/Version|int = 20101010
Farfield/Polar/Quadrant1Left|double = 0
Farfield/Polar/Quadrant1Right|double = 90
Farfield/Polar/Quadrant2Left|double = 90
Farfield/Polar/Quadrant2Right|double = 180
Farfield/Polar/Quadrant3Left|double = -180
Farfield/Polar/Quadrant3Right|double = -90
Farfield/Polar/Quadrant4Left|double = -90
Farfield/Polar/Quadrant4Right|double = 0
180	-180	0.90168
181	-179	0.49617
182	-178	-0.314908
183	-177	-0.269282
184	-176	-0.845416
185	-175	-1.4829
186	-174	-2.85066
187	-173	-4.87692
188	-172	-7.21484
189	-171	-11.9659
190	-170	-18.3393
191	-169	-27.5911
192	-168	-24.7366
193	-167	-22.3503
194	-166	-21.6448
195	-165	-22.1459
196	-164	-24.9352
197	-163	-29.1134
198	-162	-37.0985
199	-161	-51.0216
200	-160	-49.4927
201	-159	-48.8742
202	-158	-54.1838
203	-157	-42.6104
204	-156	-51.4614
205	-155	-50.5122
206	-154	-47.0394
207	-153	-51.2737
208	-152	-46.8426
209	-151	-52.5507
210	-150	-48.0304
211	-149	-53.9689
212	-148	-52.0687
213	-147	-57.5674
214	-146	-60.7508
215	-145	-60.0764
216	-144	-51.7685
217	-143	-53.1196
218	-142	-55.6828
219	-141	-55.7482
220	-140	-59.114
221	-139	-55.582
222	-138	-55.3035
223	-137	-54.1807
224	-136	-58.0761
225	-135	-57.6943
226	-134	-57.8966
227	-133	-60.7611
228	-132	-64.7279
229	-131	-56.7849
230	-130	-54.2017
231	-129	-56.4235
232	-128	-51.0934
233	-127	-53.6405
234	-126	-48.9104
235	-125	-52.6872
236	-124	-50.4404
237	-123	-45.7719
238	-122	-50.4946
239	-121	-42.5589
240	-120	-45.0092
241	-119	-45.3435
242	-118	-43.7659
243	-117	-49.0596
244	-116	-48.9265
245	-115	-47.0703
246	-114	-48.7281
247	-113	-48.6127
248	-112	-52.6841
249	-111	-57.0601
250	-110	-53.5124
251	-109	-49.632
252	-108	-51.158
253	-107	-48.2665
254	-106	-50.3808
255	-105	-57.6132
256	-104	-47.3641
257	-103	-46.0207
258	-102	-50.6103
259	-101	-54.4153
260	-100	-47.4264
261	-99	-45.0645
262	-98	-48.8319
263	-97	-55.0331
264	-96	-49.9003
265	-95	-44.7135
266	-94	-45.8647
267	-93	-47.6574
268	-92	-50.0628
269	-91	-46.3421
270	-90	-47.2827
271	-89	-43.8052
272	-88	-46.8864
273	-87	-48.1981
274	-86	-46.0245
275	-85	-42.7206
276	-84	-48.513
277	-83	-49.7904
278	-82	-45.6645
279	-81	-49.133
280	-80	-48.3444
281	-79	-40.3571
282	-78	-43.511
283	-77	-45.3919
284	-76	-42.8592
285	-75	-36.3167
286	-74	-43.5803
287	-73	-40.8817
288	-72	-42.4941
289	-71	-35.8855
290	-70	-41.6578
291	-69	-37.3568
292	-68	-36.1214
293	-67	-36.3919
294	-66	-35.1298
295	-65	-41.4771
296	-64	-45.3668
297	-63	-38.3275
298	-62	-34.705
299	-61	-48.1937
300	-60	-44.1813
301	-59	-39.932
302	-58	-40.6849
303	-57	-41.8661
304	-56	-40.0185
305	-55	-34.8626
306	-54	-32.3033
307	-53	-34.8521
308	-52	-36.3012
309	-51	-33.2439
310	-50	-39.5457
311	-49	-30.2538
312	-48	-39.0985
313	-47	-27.9823
314	-46	-27.5912
315	-45	-39.0577
316	-44	-37.1178
317	-43	-37.775
318	-42	-29.5469
319	-41	-24.7396
320	-40	-24.6906
321	-39	-23.4406
322	-38	-25.2826
323	-37	-37.1216
324	-36	-32.3036
325	-35	-33.6321
326	-34	-28.9696
327	-33	-31.7364
328	-32	-32.1998
329	-31	-23.6874
330	-30	-21.5658
331	-29	-22.0988
332	-28	-26.0816
333	-27	-23.5367
334	-26	-20.8417
335	-25	-27.0338
336	-24	-23.7088
337	-23	-18.7724
338	-22	-22.9529
339	-21	-21.7832
340	-20	-31.7405
341	-19	-25.3269
342	-18	-15.467
343	-17	-5.8842
344	-16	-2.82822
345	-15	-0.520197
346	-14	0.435693
347	-13	-0.953034
348	-12	-3.18345
349	-11	-6.26488
350	-10	3.13541
351	-9	9.53642
352	-8	13.9775
353	-7	16.2988
354	-6	18.4596
355	-5	19.6862
356	-4	20.1341
357	-3	20.7083
358	-2	20.7472
359	-1	21.6325
0	0	22.0588
1	1	21.6325
2	2	20.7472
3	3	20.7083
4	4	20.1341
5	5	19.6862
6	6	18.4596
7	7	16.2988
8	8	13.9775
9	9	9.53642
10	10	3.1354
11	11	-6.26494
12	12	-3.18349
13	13	-0.953069
14	14	0.435699
15	15	-0.520154
16	16	-2.82822
17	17	-5.88429
18	18	-15.467
19	19	-25.327
20	20	-31.7397
21	21	-21.7831
22	22	-22.9535
23	23	-18.7727
24	24	-23.7081
25	25	-27.0327
26	26	-20.842
27	27	-23.5367
28	28	-26.0821
29	29	-22.0985
30	30	-21.5652
31	31	-23.6882
32	32	-32.1995
33	33	-31.7369
34	34	-28.9691
35	35	-33.6327
36	36	-32.3045
37	37	-37.1227
38	38	-25.282
39	39	-23.4411
40	40	-24.6899
41	41	-24.7403
42	42	-29.5463
43	43	-37.7724
44	44	-37.118
45	45	-39.0591
46	46	-27.5914
47	47	-27.9816
48	48	-39.0983
49	49	-30.2538
50	50	-39.5481
51	51	-33.2451
52	52	-36.3017
53	53	-34.8521
54	54	-32.3026
55	55	-34.8618
56	56	-40.0189
57	57	-41.8646
58	58	-40.6844
59	59	-39.9331
60	60	-44.1814
61	61	-48.1936
62	62	-34.7054
63	63	-38.328
64	64	-45.3675
65	65	-41.4776
66	66	-35.1299
67	67	-36.3918
68	68	-36.1213
69	69	-37.3569
70	70	-41.6578
71	71	-35.8855
72	72	-42.4943
73	73	-40.8817
74	74	-43.5807
75	75	-36.317
76	76	-42.8596
77	77	-45.3916
78	78	-43.5117
79	79	-40.3577
80	80	-48.3458
81	81	-49.1342
82	82	-45.6657
83	83	-49.7917
84	84	-48.5148
85	85	-42.7215
86	86	-46.0258
87	87	-48.1995
88	88	-46.8879
89	89	-43.8061
90	90	-47.2842
91	91	-46.3434
92	92	-50.0646
93	93	-47.6585
94	94	-45.8658
95	95	-44.7145
96	96	-49.9018
97	97	-55.0351
98	98	-48.833
99	99	-45.0653
100	100	-47.4274
101	101	-54.4167
102	102	-50.6109
103	103	-46.0212
104	104	-47.3646
105	105	-57.6142
106	106	-50.3812
107	107	-48.2668
108	108	-51.1581
109	109	-49.6321
110	110	-53.5124
111	111	-57.0601
112	112	-52.6842
113	113	-48.6125
114	114	-48.728
115	115	-47.0706
116	116	-48.9264
117	117	-49.0592
118	118	-43.7662
119	119	-45.3437
120	120	-45.0089
121	121	-42.5593
122	122	-50.4947
123	123	-45.772
124	124	-50.4415
125	125	-52.6862
126	126	-48.9108
127	127	-53.64
128	128	-51.0934
129	129	-56.4243
130	130	-54.2016
131	131	-56.783
132	132	-64.7291
133	133	-60.7589
134	134	-57.8968
135	135	-57.6947
136	136	-58.0751
137	137	-54.1804
138	138	-55.3042
139	139	-55.5817
140	140	-59.1142
141	141	-55.7485
142	142	-55.6821
143	143	-53.12
144	144	-51.7683
145	145	-60.0767
146	146	-60.7508
147	147	-57.5674
148	148	-52.0686
149	149	-53.9691
150	150	-48.0302
151	151	-52.5508
152	152	-46.8428
153	153	-51.2737
154	154	-47.0397
155	155	-50.5119
156	156	-51.4606
157	157	-42.6106
158	158	-54.1838
159	159	-48.8737
160	160	-49.4924
161	161	-51.0207
162	162	-37.0985
163	163	-29.1135
164	164	-24.9352
165	165	-22.1459
166	166	-21.6448
167	167	-22.3504
168	168	-24.7367
169	169	-27.5911
170	170	-18.3394
171	171	-11.9659
172	172	-7.21484
173	173	-4.87692
174	174	-2.85066
175	175	-1.4829
176	176	-0.845417
177	177	-0.269283
178	178	-0.314909
179	179	0.49617
180	180	0.90168

## Sheet: 320_degree_30
CST XY Data Exchange Format V2
Title = Farfield Realized Gain Abs (Phi=1)
Xlabel = Theta / Degree
Ylabel = dBi
Curvelabel = farfield (f=0.32) [1]
Filename = ^farfield (f=0.32) [1].sig
Npoints = 361
Type = 8
Subtype = 15
Result type = farfield:cartesian
View type = Cartesian
Plot type = Real
Data/Title = Farfield Realized Gain Abs (Phi=1)
X/Label = Theta
X/Unit = deg
Y/Unit = dBi
Y/Logfactor = 10
Plot/wrapHeuristics = 0
Farfield/Plot/AngularWidthOne|double = -2.6234990221695
Farfield/Plot/AngularWidthTwo|double = 2.6234989785048
Farfield/Plot/ComplexComponent|string = Abs
Farfield/Plot/InfoText|string = Frequency = 0.32 THz\r\nMain lobe magnitude = 25.2 dBi\r\nMain lobe direction = 0.0 deg.\r\nAngular width (3 dB) = 5.2 deg.\r\nSide lobe level = -19.9 dB\r\n
Farfield/Plot/MainLobeDirection|double = 0
Farfield/Plot/Orientation|double = 180
Farfield/Plot/SideLobeRadius|double = 5.3185085854017
Farfield/Plot/Version|int = 20101010
Farfield/Polar/Quadrant1Left|double = 0
Farfield/Polar/Quadrant1Right|double = 90
Farfield/Polar/Quadrant2Left|double = 90
Farfield/Polar/Quadrant2Right|double = 180
Farfield/Polar/Quadrant3Left|double = -180
Farfield/Polar/Quadrant3Right|double = -90
Farfield/Polar/Quadrant4Left|double = -90
Farfield/Polar/Quadrant4Right|double = 0
180	-180	5.31851
181	-179	4.85269
182	-178	3.65408
183	-177	1.54323
184	-176	-1.40226
185	-175	-4.98327
186	-174	-8.9793
187	-173	-15.3057
188	-172	-31.7557
189	-171	-20.1101
190	-170	-16.0884
191	-169	-16.0481
192	-168	-18.9846
193	-167	-23.1323
194	-166	-27.7999
195	-165	-27.9344
196	-164	-24.7485
197	-163	-25.324
198	-162	-28.942
199	-161	-34.5661
200	-160	-40.1985
201	-159	-40.5967
202	-158	-38.4298
203	-157	-39.2186
204	-156	-40.0739
205	-155	-48.2645
206	-154	-58.1035
207	-153	-48.6329
208	-152	-49.4393
209	-151	-48.4588
210	-150	-53.6552
211	-149	-51.507
212	-148	-53.0943
213	-147	-54.7188
214	-146	-57.4899
215	-145	-60.9074
216	-144	-60.0668
217	-143	-57.9049
218	-142	-62.2015
219	-141	-64.2867
220	-140	-63.1516
221	-139	-57.1268
222	-138	-56.5671
223	-137	-64.6697
224	-136	-54.8226
225	-135	-57.3586
226	-134	-66.6657
227	-133	-59.5096
228	-132	-61.5232
229	-131	-56.9073
230	-130	-58.6947
231	-129	-59.4779
232	-128	-58.5101
233	-127	-62.9306
234	-126	-58.0994
235	-125	-56.6302
236	-124	-60.9294
237	-123	-58.3797
238	-122	-56.3307
239	-121	-58.3139
240	-120	-58.5204
241	-119	-61.0919
242	-118	-56.4728
243	-117	-56.228
244	-116	-58.3124
245	-115	-56.7506
246	-114	-52.4298
247	-113	-53.9683
248	-112	-50.2374
249	-111	-48.459
250	-110	-49.1437
251	-109	-50.8279
252	-108	-54.0708
253	-107	-55.859
254	-106	-54.2608
255	-105	-50.8479
256	-104	-51.783
257	-103	-50.8636
258	-102	-54.635
259	-101	-53.7545
260	-100	-54.7293
261	-99	-59.5269
262	-98	-56.6193
263	-97	-59.4817
264	-96	-56.4336
265	-95	-55.1433
266	-94	-57.419
267	-93	-54.8826
268	-92	-51.539
269	-91	-56.041
270	-90	-53.5818
271	-89	-51.2056
272	-88	-53.6734
273	-87	-54.8043
274	-86	-50.5257
275	-85	-51.4387
276	-84	-58.6058
277	-83	-52.5182
278	-82	-48.5397
279	-81	-56.999
280	-80	-52.0361
281	-79	-45.9054
282	-78	-48.0809
283	-77	-48.6412
284	-76	-42.354
285	-75	-44.2161
286	-74	-47.4552
287	-73	-39.8129
288	-72	-45.4108
289	-71	-39.4786
290	-70	-40.5202
291	-69	-44.7446
292	-68	-38.2269
293	-67	-46.3742
294	-66	-41.2307
295	-65	-46.0308
296	-64	-45.263
297	-63	-45.1043
298	-62	-45.4099
299	-61	-45.0731
300	-60	-41.9744
301	-59	-42.8212
302	-58	-45.5052
303	-57	-36.013
304	-56	-36.0497
305	-55	-38.8285
306	-54	-38.1708
307	-53	-39.5415
308	-52	-37.5615
309	-51	-37.4057
310	-50	-35.37
311	-49	-36.5307
312	-48	-36.5778
313	-47	-30.4057
314	-46	-30.6424
315	-45	-27.8724
316	-44	-31.9624
317	-43	-32.6876
318	-42	-38.5993
319	-41	-33.0916
320	-40	-39.6859
321	-39	-33.532
322	-38	-32.9235
323	-37	-36.5602
324	-36	-30.5738
325	-35	-33.0307
326	-34	-38.4689
327	-33	-32.1688
328	-32	-30.0931
329	-31	-28.7317
330	-30	-34.0808
331	-29	-29.7664
332	-28	-33.1899
333	-27	-29.389
334	-26	-42.2187
335	-25	-25.3707
336	-24	-18.6126
337	-23	-18.6903
338	-22	-18.0994
339	-21	-20.0013
340	-20	-22.5084
341	-19	-16.2538
342	-18	-9.9209
343	-17	-6.09319
344	-16	-5.39669
345	-15	-8.70546
346	-14	-8.11825
347	-13	-3.12144
348	-12	0.568026
349	-11	3.75832
350	-10	3.30284
351	-9	0.0210115
352	-8	-12.3095
353	-7	4.40811
354	-6	10.6373
355	-5	14.8794
356	-4	18.4812
357	-3	21.3892
358	-2	23.4998
359	-1	24.7146
0	0	25.1838
1	1	24.7146
2	2	23.4998
3	3	21.3892
4	4	18.4812
5	5	14.8794
6	6	10.6373
7	7	4.40813
8	8	-12.3094
9	9	0.0210577
10	10	3.30286
11	11	3.75829
12	12	0.567986
13	13	-3.12136
14	14	-8.11835
15	15	-8.70542
16	16	-5.39662
17	17	-6.09334
18	18	-9.92074
19	19	-16.2539
20	20	-22.5079
21	21	-20.002
22	22	-18.0989
23	23	-18.6907
24	24	-18.6124
25	25	-25.3709
26	26	-42.2229
27	27	-29.3891
28	28	-33.19
29	29	-29.7674
30	30	-34.0772
31	31	-28.7335
32	32	-30.091
33	33	-32.171
34	34	-38.4641
35	35	-33.0331
36	36	-30.5726
37	37	-36.5571
38	38	-32.9216
39	39	-33.5329
40	40	-39.6855
41	41	-33.093
42	42	-38.6015
43	43	-32.6883
44	44	-31.9627
45	45	-27.8724
46	46	-30.6426
47	47	-30.4055
48	48	-36.5773
49	49	-36.5299
50	50	-35.3704
51	51	-37.4062
52	52	-37.5616
53	53	-39.5414
54	54	-38.1708
55	55	-38.828
56	56	-36.0501
57	57	-36.0135
58	58	-45.5032
59	59	-42.8228
60	60	-41.9742
61	61	-45.0721
62	62	-45.4125
63	63	-45.1008
64	64	-45.2614
65	65	-46.029
66	66	-41.2286
67	67	-46.3706
68	68	-38.2259
69	69	-44.7406
70	70	-40.5213
71	71	-39.4757
72	72	-45.4154
73	73	-39.8121
74	74	-47.4477
75	75	-44.218
76	76	-42.352
77	77	-48.6361
78	78	-48.086
79	79	-45.9053
80	80	-52.0232
81	81	-57.0164
82	82	-48.5393
83	83	-52.5103
84	84	-58.6071
85	85	-51.4407
86	86	-50.5236
87	87	-54.7983
88	88	-53.6746
89	89	-51.2053
90	90	-53.5763
91	91	-56.0436
92	92	-51.5407
93	93	-54.8794
94	94	-57.4211
95	95	-55.1445
96	96	-56.4338
97	97	-59.4954
98	98	-56.6266
99	99	-59.5327
100	100	-54.7328
101	101	-53.7542
102	102	-54.6355
103	103	-50.8627
104	104	-51.7799
105	105	-50.8434
106	106	-54.2547
107	107	-55.8553
108	108	-54.0705
109	109	-50.8276
110	110	-49.1423
111	111	-48.4572
112	112	-50.2348
113	113	-53.9653
114	114	-52.4289
115	115	-56.7474
116	116	-58.3106
117	117	-56.2282
118	118	-56.4716
119	119	-61.0892
120	120	-58.5214
121	121	-58.3162
122	122	-56.3324
123	123	-58.3813
124	124	-60.9295
125	125	-56.6306
126	126	-58.0998
127	127	-62.9306
128	128	-58.5103
129	129	-59.478
130	130	-58.6939
131	131	-56.9082
132	132	-61.5237
133	133	-59.5095
134	134	-66.6687
135	135	-57.3592
136	136	-54.8226
137	137	-64.6684
138	138	-56.5682
139	139	-57.126
140	140	-63.1523
141	141	-64.2871
142	142	-62.2028
143	143	-57.9045
144	144	-60.0671
145	145	-60.9078
146	146	-57.49
147	147	-54.7192
148	148	-53.0937
149	149	-51.5076
150	150	-53.6551
151	151	-48.4587
152	152	-49.4398
153	153	-48.6327
154	154	-58.1057
155	155	-48.2647
156	156	-40.0737
157	157	-39.219
158	158	-38.4294
159	159	-40.5973
160	160	-40.1982
161	161	-34.5661
162	162	-28.9419
163	163	-25.3241
164	164	-24.7485
165	165	-27.9343
166	166	-27.8
167	167	-23.1322
168	168	-18.9847
169	169	-16.0482
170	170	-16.0884
171	171	-20.11
172	172	-31.7556
173	173	-15.3057
174	174	-8.97929
175	175	-4.98327
176	176	-1.40226
177	177	1.54323
178	178	3.65408
179	179	4.85269
180	180	5.31851
