# Supplementary material for: 220–325GHz All-Photopolymer Bragg Horn Antennas Towards Eco-Friendly Terahertz Applications
Source: Research Square preprint supplement (doi:10.21203/rs.3.rs-6221054/v1), 2025-04-21
Supplement: Supplementary file 5 [file b7f6c889bdaa5030282f8bb3.xlsx]

## Sheet: Sheet1
Frequency	5 degrees	15 degrees	30 degrees
220	-35.1097	-35.9665	-37.4301
220.105	-34.702	-35.1664	-37.6738
220.21	-34.4922	-34.3818	-37.1903
220.315	-33.9826	-33.4309	-36.1424
220.42	-32.8772	-32.2733	-34.8031
220.525	-31.3801	-31.02	-33.3919
220.63	-29.887	-29.8267	-32.044
220.735	-28.6481	-28.8111	-30.834
220.84	-27.7596	-28.0387	-29.7986
220.945	-27.2426	-27.5395	-28.9508
221.05	-27.0907	-27.3249	-28.287
221.155	-27.2875	-27.3981	-27.792
221.26	-27.8099	-27.759	-27.4418
221.365	-28.6224	-28.4045	-27.2068
221.47	-29.6677	-29.3258	-27.0565
221.575	-30.8565	-30.5009	-26.9669
221.68	-32.0748	-31.8809	-26.9271
221.785	-33.2294	-33.3724	-26.9449
221.89	-34.3148	-34.8297	-27.0454
221.995	-35.4254	-36.0899	-27.2665
222.1	-36.6595	-37.0439	-27.6526
222.205	-37.9085	-37.6396	-28.2497
222.31	-38.5483	-37.7634	-29.103
222.415	-37.7741	-37.2058	-30.2543
222.52	-35.9086	-35.9199	-31.7333
222.625	-33.8475	-34.1869	-33.5226
222.73	-32.0072	-32.3644	-35.4418
222.835	-30.4554	-30.6709	-36.9046
222.94	-29.1537	-29.1932	-37.0524
223.045	-28.0497	-27.9502	-35.8911
223.15	-27.1043	-26.9332	-34.2077
223.255	-26.2975	-26.1244	-32.4868
223.36	-25.6256	-25.5044	-30.8676
223.465	-25.095	-25.054	-29.3829
223.57	-24.7147	-24.7558	-28.054
223.675	-24.4906	-24.5929	-26.904
223.78	-24.4217	-24.5493	-25.9532
223.885	-24.4977	-24.6093	-25.2135
223.99	-24.6979	-24.7579	-24.6862
224.095	-24.9927	-24.9821	-24.361
224.2	-25.3485	-25.2724	-24.2145
224.305	-25.7379	-25.6258	-24.2081
224.41	-26.1515	-26.0477	-24.2892
224.515	-26.6064	-26.5537	-24.3989
224.62	-27.146	-27.1696	-24.4906
224.725	-27.8322	-27.9309	-24.5527
224.83	-28.7356	-28.8813	-24.622
224.935	-29.9287	-30.0698	-24.7751
225.04	-31.4749	-31.5425	-25.1114
225.145	-33.3853	-33.3053	-25.7405
225.25	-35.4404	-35.1889	-26.7841
225.355	-36.7787	-36.5313	-28.3837
225.46	-36.3364	-36.352	-30.6561
225.565	-34.6614	-34.8375	-33.208
225.67	-32.8305	-32.9835	-33.5958
225.775	-31.221	-31.2855	-30.9493
225.88	-29.8542	-29.8374	-28.0986
225.985	-28.6767	-28.6137	-25.9397
226.09	-27.6424	-27.5717	-24.4411
226.195	-26.7275	-26.6772	-23.4945
226.3	-25.9265	-25.9088	-23.0272
226.405	-25.2435	-25.2562	-23.004
226.51	-24.6848	-24.7163	-23.4217
226.615	-24.2532	-24.2891	-24.3111
226.72	-23.9472	-23.975	-25.7487
226.825	-23.76	-23.7727	-27.8895
226.93	-23.6815	-23.6781	-31.0416
227.035	-23.6995	-23.6847	-35.7121
227.14	-23.8028	-23.7841	-39.6202
227.245	-23.9827	-23.968	-35.7623
227.35	-24.2358	-24.2301	-31.9731
227.455	-24.5646	-24.5685	-29.6181
227.56	-24.9773	-24.9875	-28.178
227.665	-25.4868	-25.4977	-27.3443
227.77	-26.1085	-26.1153	-26.9376
227.875	-26.8575	-26.8586	-26.8351
227.98	-27.7441	-27.7422	-26.9354
228.085	-28.766	-28.7669	-27.1439
228.19	-29.8916	-29.9005	-27.3698
228.295	-31.0289	-31.0444	-27.5356
228.4	-31.9896	-31.9982	-27.5909
228.505	-32.5081	-32.4936	-27.5208
228.61	-32.4075	-32.3736	-27.3412
228.715	-31.7683	-31.7398	-27.0853
228.82	-30.8339	-30.8298	-26.7901
228.925	-29.8103	-29.8303	-26.4896
229.03	-28.8042	-28.8339	-26.2111
229.135	-27.8538	-27.876	-25.9748
229.24	-26.9681	-26.9711	-25.7923
229.345	-26.1494	-26.1313	-25.6665
229.45	-25.4033	-25.3712	-25.5917
229.555	-24.7412	-24.7069	-25.5556
229.66	-24.1776	-24.1531	-25.5435
229.765	-23.7278	-23.7212	-25.544
229.87	-23.4051	-23.4187	-25.5542
229.975	-23.2188	-23.2489	-25.5825
230.08	-23.174	-23.2116	-25.6475
230.185	-23.2706	-23.3042	-25.7736
230.29	-23.5041	-23.5223	-25.985
230.395	-23.8658	-23.8606	-26.3013
230.5	-24.3441	-24.3146	-26.7333
230.605	-24.9281	-24.8821	-27.2804
230.71	-25.6109	-25.5649	-27.9272
230.815	-26.3959	-26.3714	-28.6393
230.92	-27.302	-27.3184	-29.3584
231.025	-28.3673	-28.434	-30.0001
231.13	-29.652	-29.7608	-30.4612
231.235	-31.2399	-31.3587	-30.6467
231.34	-33.236	-33.3027	-30.5101
231.445	-35.7229	-35.6422	-30.0803
231.55	-38.4467	-38.1478	-29.4455
231.655	-39.7673	-39.519	-28.713
231.76	-38.1956	-38.3064	-27.9761
231.865	-35.6904	-35.9085	-27.3018
231.97	-33.5169	-33.6684	-26.7318
232.075	-31.7934	-31.8381	-26.2877
232.18	-30.424	-30.3771	-25.9757
232.285	-29.3173	-29.2167	-25.7903
232.39	-28.4129	-28.3022	-25.7171
232.495	-27.6776	-27.5947	-25.7358
232.6	-27.0976	-27.0661	-25.8248
232.705	-26.6704	-26.6964	-25.9664
232.81	-26.3982	-26.4709	-26.1533
232.915	-26.2833	-26.3792	-26.3916
233.02	-26.3256	-26.4148	-26.701
233.125	-26.5213	-26.5751	-27.1096
233.23	-26.8634	-26.8626	-27.6462
233.335	-27.3446	-27.2856	-28.3299
233.44	-27.961	-27.8593	-29.1552
233.545	-28.7184	-28.6075	-30.067
233.65	-29.6397	-29.565	-30.9277
233.755	-30.773	-30.781	-31.5117
233.86	-32.2002	-32.3258	-31.6077
233.965	-34.0508	-34.3012	-31.1974
234.07	-36.5211	-36.8424	-30.4609
234.175	-39.8276	-39.9935	-29.6004
234.28	-43.2237	-42.694	-28.7295
234.385	-42.4511	-41.8682	-27.8793
234.49	-38.9654	-38.9407	-27.0398
234.595	-36.0892	-36.3052	-26.1946
234.7	-33.9736	-34.2196	-25.3412
234.805	-32.3707	-32.5419	-24.496
234.91	-31.0907	-31.1471	-23.6874
235.015	-30.0081	-29.9584	-22.9467
235.12	-29.0506	-28.9356	-22.3005
235.225	-28.1888	-28.061	-21.768
235.33	-27.4245	-27.3293	-21.3606
235.435	-26.7749	-26.7391	-21.0836
235.54	-26.2592	-26.2879	-20.9377
235.645	-25.8897	-25.9688	-20.9201
235.75	-25.6663	-25.7688	-21.0258
235.855	-25.575	-25.6682	-21.2481
235.96	-25.5873	-25.6411	-21.5795
236.065	-25.6627	-25.6595	-22.0115
236.17	-25.7568	-25.6988	-22.536
236.275	-25.8353	-25.745	-23.145
236.38	-25.8887	-25.8011	-23.8326
236.485	-25.9393	-25.8875	-24.5952
236.59	-26.0343	-26.0381	-25.4336
236.695	-26.2333	-26.2944	-26.3543
236.8	-26.5958	-26.7001	-27.3712
236.905	-27.1772	-27.2996	-28.5065
237.01	-28.0301	-28.1391	-29.7914
237.115	-29.2108	-29.2718	-31.2634
237.22	-30.7891	-30.7669	-32.9548
237.325	-32.8671	-32.7282	-34.8448
237.43	-35.6176	-35.335	-36.7081
237.535	-39.3802	-38.9519	-37.8524
237.64	-44.8898	-44.4904	-37.5087
237.745	-51.0655	-52.6057	-36.0412
237.85	-46.7348	-47.0732	-34.3191
237.955	-42.4834	-42.1724	-32.7527
238.06	-39.7914	-39.3676	-31.4273
238.165	-37.8258	-37.4923	-30.3247
238.27	-36.225	-36.0731	-29.4045
238.375	-34.8593	-34.8941	-28.6266
238.48	-33.6999	-33.8659	-27.9574
238.585	-32.7501	-32.9679	-27.3713
238.69	-32.0138	-32.2101	-26.8518
238.795	-31.4857	-31.6096	-26.3907
238.9	-31.1508	-31.1787	-25.9871
239.005	-30.9865	-30.9217	-25.6454
239.11	-30.9661	-30.8349	-25.3728
239.215	-31.0629	-30.9079	-25.1775
239.32	-31.255	-31.1256	-25.0664
239.425	-31.5297	-31.4695	-25.0446
239.53	-31.8863	-31.9208	-25.1149
239.635	-32.3357	-32.4634	-25.2776
239.74	-32.8963	-33.0879	-25.5323
239.845	-33.5897	-33.794	-25.8787
239.95	-34.4351	-34.5915	-26.3194
240.055	-35.4453	-35.4977	-26.8627
240.16	-36.6224	-36.5325	-27.526
240.265	-37.9526	-37.7098	-28.3396
240.37	-39.3973	-39.0241	-29.3518
240.475	-40.875	-40.4255	-30.638
240.58	-42.2297	-41.7805	-32.3199
240.685	-43.2084	-42.8413	-34.6169
240.79	-43.5402	-43.3247	-38.008
240.895	-43.1611	-43.138	-44.0119
241	-42.2992	-42.4664	-68.1836
241.105	-41.2659	-41.5777	-43.6639
241.21	-40.2781	-40.6601	-37.8299
241.315	-39.4449	-39.8139	-34.4761
241.42	-38.8078	-39.0903	-32.1651
241.525	-38.3726	-38.5175	-30.4322
241.63	-38.1263	-38.1127	-29.0654
241.735	-38.045	-37.8855	-27.9516
241.84	-38.1001	-37.8386	-27.0277
241.945	-38.2631	-37.9682	-26.2599
242.05	-38.5116	-38.2631	-25.6321
242.155	-38.8346	-38.7043	-25.1391
242.26	-39.2339	-39.2662	-24.7799
242.365	-39.7225	-39.9188	-24.5551
242.47	-40.3176	-40.6328	-24.4638
242.575	-41.0323	-41.3849	-24.5023
242.68	-41.8647	-42.1583	-24.6642
242.785	-42.7859	-42.9343	-24.941
242.89	-43.7237	-43.6722	-25.3243
242.995	-44.5497	-44.2874	-25.8088
243.1	-45.0939	-44.6559	-26.3957
243.205	-45.2156	-44.6752	-27.0957
243.31	-44.8957	-44.3472	-27.9281
243.415	-44.2446	-43.7824	-28.9149
243.52	-43.4177	-43.1163	-30.0619
243.625	-42.5429	-42.4397	-31.3131
243.73	-41.7017	-41.7863	-32.4602
243.835	-40.9373	-41.1525	-33.0811
243.94	-40.2673	-40.5249	-32.8086
244.045	-39.6919	-39.9003	-31.7968
244.15	-39.2007	-39.2947	-30.5137
244.255	-38.7789	-38.7379	-29.2814
244.36	-38.4114	-38.2617	-28.2199
244.465	-38.0877	-37.8892	-27.3446
244.57	-37.8023	-37.6275	-26.6326
244.675	-37.5542	-37.4645	-26.0527
244.78	-37.3437	-37.3701	-25.5793
244.885	-37.1699	-37.3024	-25.1991
244.99	-37.0304	-37.2216	-24.9125
245.095	-36.924	-37.1077	-24.7316
245.2	-36.8557	-36.9743	-24.6744
245.305	-36.8414	-36.8669	-24.76
245.41	-36.9101	-36.8495	-25.0029
245.515	-37.103	-36.9897	-25.4099
245.62	-37.4702	-37.3508	-25.9764
245.725	-38.0684	-37.9907	-26.6847
245.83	-38.9593	-38.9639	-27.5066
245.935	-40.2091	-40.3218	-28.4137
246.04	-41.8799	-42.0963	-29.3984
246.145	-43.9825	-44.2263	-30.4991
246.25	-46.2861	-46.336	-31.8064
246.355	-47.9217	-47.5442	-33.4091
246.46	-47.954	-47.4171	-35.1211
246.565	-47.0618	-46.7619	-35.7273
246.67	-46.3023	-46.328	-33.9126
246.775	-45.9993	-46.2814	-31.0233
246.88	-45.9812	-46.3496	-28.367
246.985	-45.6879	-45.8939	-26.2106
247.09	-44.5146	-44.4675	-24.5232
247.195	-42.5884	-42.4418	-23.237
247.3	-40.5185	-40.4086	-22.2936
247.405	-38.6886	-38.6551	-21.6457
247.51	-37.2163	-37.2501	-21.2539
247.615	-36.1058	-36.182	-21.0819
247.72	-35.3268	-35.4175	-21.0944
247.825	-34.8399	-34.9196	-21.255
247.93	-34.6035	-34.652	-21.5279
248.035	-34.5749	-34.5806	-21.8821
248.14	-34.7114	-34.6745	-22.298
248.245	-34.975	-34.9083	-22.7738
248.35	-35.3406	-35.267	-23.328
248.455	-35.8059	-35.7517	-23.9955
248.56	-36.3987	-36.3843	-24.8195
248.665	-37.1807	-37.2136	-25.8398
248.77	-38.2507	-38.3223	-27.0723
248.875	-39.7607	-39.847	-28.4638
248.98	-41.9746	-42.0352	-29.7966
249.085	-45.4804	-45.4419	-30.6077
249.19	-52.3527	-51.9515	-30.4669
249.295	-61.6168	-62.5319	-29.5161
249.4	-47.9798	-48.3635	-28.2472
249.505	-42.7838	-42.9699	-26.9865
249.61	-39.5575	-39.6352	-25.8455
249.715	-37.2326	-37.2428	-24.8376
249.82	-35.4271	-35.4004	-23.9503
249.925	-33.9625	-33.9245	-23.1733
250.03	-32.7461	-32.7159	-22.5056
250.135	-31.7287	-31.7168	-21.9534
250.24	-30.884	-30.8927	-21.525
250.345	-30.1981	-30.2226	-21.2274
250.45	-29.6619	-29.693	-21.0632
250.555	-29.2676	-29.2948	-21.0302
250.66	-29.0066	-29.0209	-21.1217
250.765	-28.8686	-28.8653	-21.3287
250.87	-28.8429	-28.8222	-21.6428
250.975	-28.9192	-28.8868	-22.0603
251.08	-29.0905	-29.0558	-22.5857
251.185	-29.3558	-29.3292	-23.2346
251.29	-29.7218	-29.7118	-24.033
251.395	-30.205	-30.215	-25.0132
251.5	-30.8323	-30.8593	-26.2005
251.605	-31.6427	-31.6773	-27.5803
251.71	-32.6903	-32.7188	-29.0167
251.815	-34.0546	-34.0609	-30.1214
251.92	-35.8642	-35.8324	-30.3388
252.025	-38.3615	-38.277	-29.5671
252.13	-42.1187	-41.9646	-28.3053
252.235	-49.2082	-48.936	-27.0077
252.34	-58.4891	-59.348	-25.8558
252.445	-45.0411	-45.0381	-24.8785
252.55	-39.9204	-39.8509	-24.0542
252.655	-36.7385	-36.6633	-23.3569
252.76	-34.4475	-34.3901	-22.7736
252.865	-32.681	-32.6514	-22.3085
252.97	-31.2717	-31.2706	-21.9801
253.075	-30.1314	-30.1525	-21.8144
253.18	-29.2085	-29.2416	-21.8383
253.285	-28.4703	-28.5038	-22.0728
253.39	-27.8936	-27.9176	-22.5243
253.495	-27.4604	-27.4689	-23.1694
253.6	-27.1563	-27.1481	-23.9251
253.705	-26.9699	-26.9486	-24.6142
253.81	-26.8926	-26.8656	-24.9829
253.915	-26.9204	-26.8967	-24.8607
254.02	-27.0535	-27.0415	-24.333
254.125	-27.298	-27.3027	-23.6545
254.23	-27.6652	-27.687	-23.0484
254.335	-28.173	-28.2068	-22.6354
254.44	-28.8457	-28.8822	-22.454
254.545	-29.7168	-29.7442	-22.4866
254.65	-30.8341	-30.8402	-22.6663
254.755	-32.271	-32.2461	-22.8742
254.86	-34.1525	-34.0913	-22.9554
254.965	-36.7234	-36.6252	-22.7823
255.07	-40.5686	-40.4336	-22.3375
255.175	-47.7083	-47.4822	-21.7204
255.28	-52.8427	-52.3771	-21.0691
255.385	-42.5727	-42.4197	-20.4911
255.49	-37.7424	-37.6409	-20.0452
255.595	-34.654	-34.5942	-19.7515
255.7	-32.4127	-32.3918	-19.606
255.805	-30.6859	-30.6971	-19.5906
255.91	-29.3156	-29.3485	-19.6815
256.015	-28.2153	-28.2573	-19.8555
256.12	-27.3318	-27.3707	-20.0974
256.225	-26.6293	-26.6558	-20.4048
256.33	-26.0819	-26.0909	-20.7902
256.435	-25.6699	-25.6614	-21.2797
256.54	-25.3784	-25.357	-21.9093
256.645	-25.1969	-25.1705	-22.7215
256.75	-25.1193	-25.097	-23.7635
256.855	-25.1445	-25.1338	-25.0882
256.96	-25.2757	-25.2809	-26.7526
257.065	-25.5211	-25.5416	-28.7984
257.17	-25.8927	-25.9233	-31.135
257.275	-26.4075	-26.4389	-33.0911
257.38	-27.0872	-27.1085	-33.1597
257.485	-27.9611	-27.9623	-31.3336
257.59	-29.0709	-29.0452	-29.0912
257.695	-30.4802	-30.4272	-27.0792
257.8	-32.2959	-32.2236	-25.3791
257.905	-34.7163	-34.6454	-23.9543
258.01	-38.1576	-38.1346	-22.7632
258.115	-43.5061	-43.6738	-21.7765
258.22	-47.168	-47.3563	-20.9741
258.325	-40.9566	-40.8228	-20.3419
258.43	-36.4119	-36.3034	-19.8685
258.535	-33.3629	-33.3049	-19.5436
258.64	-31.1336	-31.1209	-19.3576
258.745	-29.419	-29.4397	-19.3022
258.85	-28.0663	-28.1053	-19.3705
258.955	-26.9889	-27.0316	-19.5584
259.06	-26.1333	-26.1674	-19.8652
259.165	-25.4631	-25.481	-20.2945
259.27	-24.9521	-24.9513	-20.8538
259.375	-24.5803	-24.5635	-21.5547
259.48	-24.3318	-24.3061	-22.4103
259.585	-24.1949	-24.1695	-23.4308
259.69	-24.1611	-24.1449	-24.6114
259.795	-24.2256	-24.225	-25.9044
259.9	-24.3876	-24.4043	-27.1608
260.005	-24.6501	-24.6807	-28.066
260.11	-25.021	-25.0571	-28.2374
260.215	-25.5127	-25.5436	-27.5943
260.32	-26.144	-26.1588	-26.4564
260.425	-26.9415	-26.9328	-25.1815
260.53	-27.9443	-27.91	-23.9656
260.635	-29.2109	-29.1562	-22.8817
260.74	-30.8362	-30.7736	-21.9474
260.845	-32.9875	-32.9386	-21.16
260.95	-36.007	-36.0064	-20.5118
261.055	-40.7663	-40.8901	-19.9945
261.16	-49.5567	-49.9642	-19.6008
261.265	-44.4634	-44.1941	-19.3248
261.37	-38.0973	-37.9756	-19.1622
261.475	-34.4345	-34.4017	-19.1105
261.58	-31.9451	-31.9683	-19.17
261.685	-30.1032	-30.1572	-19.3439
261.79	-28.6734	-28.7362	-19.6399
261.895	-27.5311	-27.585	-20.0705
262	-26.6042	-26.6374	-20.6539
262.105	-25.8495	-25.8577	-21.4159
262.21	-25.242	-25.2281	-22.3907
262.315	-24.769	-24.7408	-23.6239
262.42	-24.425	-24.393	-25.1736
262.525	-24.2095	-24.1838	-27.1003
262.63	-24.1241	-24.1122	-29.3898
262.735	-24.1714	-24.1765	-31.5948
262.84	-24.3536	-24.3739	-32.2371
262.945	-24.6727	-24.7016	-30.6591
263.05	-25.1314	-25.1591	-28.3915
263.155	-25.7355	-25.751	-26.3501
263.26	-26.4973	-26.4918	-24.6761
263.365	-27.4426	-27.4121	-23.3257
263.47	-28.6197	-28.5674	-22.2399
263.575	-30.1169	-30.054	-21.3738
263.68	-32.0967	-32.0433	-20.697
263.785	-34.8878	-34.8767	-20.1898
263.89	-39.3057	-39.4103	-19.8391
263.995	-47.9611	-48.5043	-19.6364
264.1	-44.6495	-44.3701	-19.5748
264.205	-37.6074	-37.4474	-19.6485
264.31	-33.7823	-33.7055	-19.8516
264.415	-31.316	-31.2959	-20.1786
264.52	-29.6181	-29.6365	-20.6244
264.625	-28.4301	-28.4707	-21.1858
264.73	-27.6076	-27.6546	-21.863
264.835	-27.0515	-27.0899	-22.6592
264.94	-26.6806	-26.6991	-23.5802
265.045	-26.4227	-26.4167	-24.6267
265.15	-26.217	-26.1908	-25.7757
265.255	-26.0228	-25.9883	-26.9402
265.36	-25.8283	-25.8005	-27.9059
265.465	-25.6505	-25.6412	-28.3331
265.57	-25.5265	-25.5404	-27.9943
265.675	-25.4998	-25.5334	-27.0385
265.78	-25.6106	-25.6544	-25.8171
265.885	-25.8909	-25.9322	-24.5901
265.99	-26.3633	-26.3891	-23.4763
266.095	-27.0421	-27.0419	-22.5119
266.2	-27.9321	-27.9016	-21.6988
266.305	-29.0268	-28.971	-21.0278
266.41	-30.3006	-30.2378	-20.4883
266.515	-31.6901	-31.6521	-20.0722
266.62	-33.0549	-33.075	-19.7748
266.725	-34.1228	-34.2002	-19.594
266.83	-34.5206	-34.5896	-19.53
266.935	-34.0479	-34.0426	-19.5835
267.04	-32.9096	-32.845	-19.7556
267.145	-31.486	-31.4161	-20.0469
267.25	-30.052	-30.0124	-20.458
267.355	-28.7435	-28.7427	-20.9901
267.46	-27.6142	-27.6435	-21.6464
267.565	-26.6787	-26.7224	-22.4349
267.67	-25.9323	-25.9745	-23.3695
267.775	-25.3611	-25.3896	-24.4704
267.88	-24.946	-24.9545	-25.7565
267.985	-24.6654	-24.6542	-27.2179
268.09	-24.4982	-24.4735	-28.7294
268.195	-24.4264	-24.3985	-29.8785
268.3	-24.4382	-24.418	-29.9956
268.405	-24.5298	-24.5257	-28.932
268.51	-24.7057	-24.7206	-27.311
268.615	-24.9765	-25.0064	-25.6823
268.72	-25.3551	-25.3901	-24.2577
268.825	-25.8509	-25.878	-23.0787
268.93	-26.4635	-26.4702	-22.1319
269.035	-27.1738	-27.153	-21.3913
269.14	-27.9341	-27.8894	-20.8305
269.245	-28.662	-28.6109	-20.4267
269.35	-29.2519	-29.2204	-20.1619
269.455	-29.6143	-29.6216	-20.0224
269.56	-29.7269	-29.7687	-19.9992
269.665	-29.6434	-29.6939	-20.0875
269.77	-29.449	-29.4798	-20.2855
269.875	-29.2098	-29.2062	-20.5945
269.98	-28.9523	-28.9184	-21.0176
270.085	-28.6699	-28.6241	-21.5587
270.19	-28.3415	-28.3065	-22.2221
270.295	-27.9532	-27.9443	-23.011
270.4	-27.5105	-27.5291	-23.9246
270.505	-27.0383	-27.0729	-24.9514
270.61	-26.5707	-26.6048	-26.0541
270.715	-26.1396	-26.1596	-27.1418
270.82	-25.7679	-25.7675	-28.0365
270.925	-25.4671	-25.4486	-28.4955
271.03	-25.2396	-25.2116	-28.3629
271.135	-25.0815	-25.0555	-27.7253
271.24	-24.9859	-24.9718	-26.8271
271.345	-24.9451	-24.9487	-25.8831
271.45	-24.9533	-24.9733	-25.0123
271.555	-25.006	-25.035	-24.2604
271.66	-25.1	-25.1273	-23.6327
271.765	-25.2321	-25.2474	-23.1155
271.87	-25.3974	-25.3953	-22.688
271.975	-25.5894	-25.5714	-22.3303
272.08	-25.7998	-25.7742	-22.0291
272.185	-26.0203	-25.9992	-21.7809
272.29	-26.2446	-26.2387	-21.5916
272.395	-26.4697	-26.4834	-21.4743
272.5	-26.6946	-26.7234	-21.4439
272.605	-26.9184	-26.9501	-21.5129
272.71	-27.1356	-27.155	-21.6865
272.815	-27.3329	-27.3291	-21.9594
272.92	-27.489	-27.4607	-22.3135
273.025	-27.5797	-27.5367	-22.7179
273.13	-27.5879	-27.5467	-23.134
273.235	-27.5144	-27.4903	-23.527
273.34	-27.3826	-27.382	-23.8797
273.445	-27.2331	-27.2516	-24.2029
273.55	-27.1123	-27.1388	-24.5303
273.655	-27.0628	-27.0846	-24.9026
273.76	-27.117	-27.125	-25.3451
273.865	-27.2941	-27.2856	-25.8444
273.97	-27.5994	-27.5786	-26.3276
274.075	-28.0209	-27.9987	-26.6577
274.18	-28.5261	-28.5167	-26.6833
274.285	-29.0564	-29.0721	-26.3465
274.39	-29.5278	-29.5706	-25.7379
274.495	-29.846	-29.9017	-25.0247
274.6	-29.9403	-29.9835	-24.3521
274.705	-29.7977	-29.8083	-23.8077
274.81	-29.4638	-29.4406	-23.4324
274.915	-29.0116	-28.9697	-23.2392
275.02	-28.5077	-28.4674	-23.2276
275.125	-27.998	-27.9744	-23.392
275.23	-27.5096	-27.5077	-23.7266
275.335	-27.0569	-27.0718	-24.2279
275.44	-26.6485	-26.6693	-24.8939
275.545	-26.2906	-26.3056	-25.7182
275.65	-25.9891	-25.99	-26.6724
275.755	-25.7494	-25.7345	-27.6686
275.86	-25.5769	-25.5503	-28.5036
275.965	-25.476	-25.4463	-28.8611
276.07	-25.4508	-25.4278	-28.5221
276.175	-25.5048	-25.4962	-27.6086
276.28	-25.6409	-25.6497	-26.4434
276.385	-25.8611	-25.8843	-25.2777
276.49	-26.1654	-26.1948	-24.2294
276.595	-26.5496	-26.5739	-23.3323
276.7	-27.0017	-27.0109	-22.5826
276.805	-27.4965	-27.4865	-21.9635
276.91	-27.9897	-27.966	-21.4575
277.015	-28.4139	-28.392	-21.0523
277.12	-28.6864	-28.6844	-20.7425
277.225	-28.7336	-28.76	-20.5293
277.33	-28.5263	-28.5711	-20.4175
277.435	-28.095	-28.1365	-20.4127
277.54	-27.5113	-27.5309	-20.5167
277.645	-26.8533	-26.8457	-20.7244
277.75	-26.1836	-26.1553	-21.0215
277.855	-25.5435	-25.5073	-21.384
277.96	-24.9577	-24.9263	-21.782
278.065	-24.4398	-24.4215	-22.1891
278.17	-23.9973	-23.9944	-22.5956
278.275	-23.6341	-23.6432	-23.0194
278.38	-23.3527	-23.3668	-23.5089
278.485	-23.1542	-23.1655	-24.1369
278.59	-23.0395	-23.0419	-24.9928
278.695	-23.0088	-22.9999	-26.1799
278.8	-23.0624	-23.0443	-27.8164
278.905	-23.2011	-23.1797	-30.0114
279.01	-23.4264	-23.4096	-32.6321
279.115	-23.7413	-23.7364	-34.2811
279.22	-24.1505	-24.1618	-32.9817
279.325	-24.6604	-24.6868	-30.4711
279.43	-25.2781	-25.3129	-28.3457
279.535	-26.0101	-26.0416	-26.8134
279.64	-26.8571	-26.8724	-25.7879
279.745	-27.8052	-27.795	-25.1711
279.85	-28.8065	-28.7723	-24.8841
279.955	-29.7482	-29.7079	-24.8633
280.06	-30.4291	-30.4125	-25.0552
280.165	-30.6141	-30.6386	-25.4151
280.27	-30.2072	-30.2538	-25.9113
280.375	-29.3474	-29.3815	-26.5292
280.48	-28.2752	-28.2794	-27.2739
280.585	-27.1763	-27.1549	-28.1601
280.69	-26.1503	-26.1178	-29.1796
280.795	-25.2395	-25.2104	-30.2238
280.9	-24.4575	-24.4415	-30.9595
281.005	-23.805	-23.8056	-30.8754
281.11	-23.278	-23.2925	-29.8223
281.215	-22.8706	-22.8924	-28.2455
281.32	-22.5772	-22.598	-26.6179
281.425	-22.3929	-22.4052	-25.1596
281.53	-22.3141	-22.3136	-23.9283
281.635	-22.3391	-22.3256	-22.9182
281.74	-22.4687	-22.4462	-22.1037
281.845	-22.7064	-22.6818	-21.457
281.95	-23.0592	-23.0405	-20.9533
282.055	-23.5376	-23.5314	-20.5736
282.16	-24.1567	-24.1661	-20.3054
282.265	-24.9366	-24.9596	-20.1421
282.37	-25.904	-25.9332	-20.0819
282.475	-27.0942	-27.1172	-20.1256
282.58	-28.552	-28.5542	-20.2747
282.685	-30.3249	-30.2942	-20.5297
282.79	-32.4141	-32.3521	-20.8881
282.895	-34.5522	-34.5007	-21.3437
283	-35.6901	-35.7315	-21.8857
283.105	-34.7486	-34.8477	-22.4985
283.21	-32.6476	-32.7066	-23.1606
283.315	-30.5291	-30.5351	-23.8425
283.42	-28.7184	-28.6922	-24.5023
283.525	-27.2278	-27.1911	-25.0795
283.63	-26.0117	-25.9802	-25.4937
283.735	-25.025	-25.0074	-25.6604
283.84	-24.2315	-24.2298	-25.5288
283.945	-23.6035	-23.6142	-25.1173
284.05	-23.1196	-23.1359	-24.5082
284.155	-22.7638	-22.7777	-23.8059
284.26	-22.5249	-22.5302	-23.0987
284.365	-22.3969	-22.3902	-22.445
284.47	-22.3786	-22.3608	-21.8766
284.575	-22.4737	-22.4493	-21.4064
284.68	-22.6905	-22.6662	-21.0372
284.785	-23.0407	-23.0236	-20.7665
284.89	-23.5386	-23.5342	-20.5914
284.995	-24.2005	-24.2111	-20.5106
285.1	-25.0437	-25.067	-20.5266
285.205	-26.0866	-26.1156	-20.646
285.31	-27.3491	-27.3729	-20.8789
285.415	-28.8537	-28.8603	-21.2389
285.52	-30.6239	-30.6054	-21.7419
285.625	-32.6653	-32.6283	-22.4061
285.73	-34.8632	-34.8424	-23.2518
285.835	-36.6183	-36.6697	-24.3008
285.94	-36.6487	-36.7358	-25.5749
286.045	-34.8318	-34.8546	-27.0839
286.15	-32.4707	-32.4372	-28.7854
286.255	-30.2802	-30.2302	-30.4631
286.36	-28.4123	-28.371	-31.5327
286.465	-26.863	-26.8404	-31.3155
286.57	-25.6002	-25.5967	-29.9958
286.675	-24.5911	-24.6016	-28.3164
286.78	-23.806	-23.8229	-26.717
286.885	-23.2175	-23.233	-25.3304
286.99	-22.8002	-22.8085	-24.1719
287.095	-22.5308	-22.529	-23.2253
287.2	-22.3893	-22.3782	-22.4688
287.305	-22.3606	-22.3445	-21.8817
287.41	-22.4372	-22.4221	-21.4458
287.515	-22.6204	-22.6125	-21.1451
287.62	-22.9215	-22.9248	-20.9661
287.725	-23.3614	-23.3764	-20.8986
287.83	-23.9707	-23.994	-20.9358
287.935	-24.7905	-24.8151	-21.0757
288.04	-25.8767	-25.8936	-21.3214
288.145	-27.3111	-27.311	-21.6815
288.25	-29.2288	-29.2041	-22.1698
288.355	-31.8892	-31.836	-22.8058
288.46	-35.9036	-35.8274	-23.6146
288.565	-43.1204	-43.1129	-24.6289
288.67	-44.6613	-44.8536	-25.8914
288.775	-36.725	-36.6892	-27.4579
288.88	-32.4053	-32.3427	-29.3944
288.985	-29.5687	-29.5138	-31.7304
289.09	-27.5017	-27.4676	-34.1862
289.195	-25.9169	-25.9069	-35.4202
289.3	-24.6744	-24.6855	-34.16
289.405	-23.6975	-23.7219	-31.8295
289.51	-22.9389	-22.9667	-29.6658
289.615	-22.366	-22.3876	-27.9014
289.72	-21.9533	-21.9615	-26.5017
289.825	-21.6788	-21.6712	-25.4055
289.93	-21.5235	-21.5026	-24.5644
290.035	-21.472	-21.4451	-23.944
290.14	-21.5142	-21.491	-23.5198
290.245	-21.6474	-21.6371	-23.274
290.35	-21.8775	-21.8857	-23.1935
290.455	-22.2193	-22.2456	-23.2684
290.56	-22.6955	-22.7332	-23.4922
290.665	-23.336	-23.3731	-23.8623
290.77	-24.1781	-24.2	-24.3798
290.875	-25.2684	-25.2614	-25.0505
290.98	-26.6686	-26.6247	-25.8826
291.085	-28.4675	-28.3892	-26.8814
291.19	-30.7964	-30.7072	-28.0328
291.295	-33.8089	-33.7781	-29.2642
291.4	-37.1885	-37.3636	-30.3714
291.505	-37.9443	-38.1494	-30.9792
291.61	-34.9672	-34.9171	-30.7648
291.715	-31.8366	-31.7124	-29.8336
291.82	-29.3668	-29.263	-28.5834
291.925	-27.4335	-27.381	-27.3219
292.03	-25.894	-25.8953	-26.1848
292.135	-24.6572	-24.6988	-25.2088
292.24	-23.6664	-23.7271	-24.3901
292.345	-22.8837	-22.9413	-23.7123
292.45	-22.2812	-22.3174	-23.1572
292.555	-21.8351	-21.8402	-22.7092
292.66	-21.5245	-21.4988	-22.3571
292.765	-21.3308	-21.2843	-22.0936
292.87	-21.2392	-21.1886	-21.9155
292.975	-21.2404	-21.2041	-21.8235
293.08	-21.3318	-21.3247	-21.8211
293.185	-21.5188	-21.5463	-21.9158
293.29	-21.8132	-21.8693	-22.1194
293.395	-22.2322	-22.2995	-22.449
293.5	-22.7957	-22.8497	-22.9291
293.605	-23.5246	-23.5403	-23.5937
293.71	-24.4393	-24.3993	-24.4919
293.815	-25.5579	-25.4613	-25.6955
293.92	-26.8921	-26.7638	-27.3178
294.025	-28.4338	-28.3319	-29.5529
294.13	-30.1117	-30.1238	-32.7668
294.235	-31.6766	-31.8642	-37.5292
294.34	-32.5647	-32.8087	-40.4188
294.445	-32.2281	-32.2797	-35.5027
294.55	-30.8916	-30.7493	-31.3666
294.655	-29.2101	-29.0282	-28.5625
294.76	-27.5843	-27.4666	-26.5554
294.865	-26.1544	-26.1321	-25.0561
294.97	-24.9513	-25.0097	-23.9053
295.075	-23.97	-24.0724	-23.0068
295.18	-23.1944	-23.2988	-22.2997
295.285	-22.605	-22.6762	-21.7449
295.39	-22.1807	-22.1981	-21.3183
295.495	-21.9006	-21.8618	-21.0056
295.6	-21.7455	-21.6655	-20.7988
295.705	-21.7004	-21.607	-20.6928
295.81	-21.7563	-21.6824	-20.6829
295.915	-21.9118	-21.8855	-20.7629
296.02	-22.1732	-22.209	-20.9251
296.125	-22.5536	-22.6453	-21.1615
296.23	-23.0692	-23.1894	-21.4657
296.335	-23.7371	-23.8418	-21.8359
296.44	-24.5715	-24.6116	-22.2773
296.545	-25.5799	-25.5182	-22.8021
296.65	-26.7577	-26.5896	-23.427
296.755	-28.079	-27.8532	-24.1668
296.86	-29.4766	-29.3087	-25.0234
296.965	-30.8068	-30.8521	-25.9691
297.07	-31.808	-32.1253	-26.9236
297.175	-32.15	-32.5092	-27.7414
297.28	-31.6815	-31.7681	-28.2516
297.385	-30.6049	-30.414	-28.3697
297.49	-29.2689	-28.9892	-28.1705
297.595	-27.931	-27.7218	-27.8142
297.7	-26.7234	-26.6553	-27.4278
297.805	-25.7004	-25.7703	-27.0586
297.91	-24.8756	-25.0341	-26.6881
298.015	-24.2417	-24.4198	-26.2706
298.12	-23.78	-23.9125	-25.7754
298.225	-23.4657	-23.5093	-25.2152
298.33	-23.2724	-23.2166	-24.6426
298.435	-23.1771	-23.0455	-24.1256
298.54	-23.1656	-23.0072	-23.7228
298.645	-23.2358	-23.1098	-23.4712
298.75	-23.3982	-23.3553	-23.3843
298.855	-23.6724	-23.7377	-23.4526
298.96	-24.0813	-24.243	-23.6457
299.065	-24.6436	-24.8494	-23.9159
299.17	-25.3656	-25.5313	-24.2096
299.275	-26.2309	-26.2648	-24.4869
299.38	-27.1867	-27.0333	-24.742
299.485	-28.1312	-27.824	-25.0103
299.59	-28.9187	-28.6073	-25.354
299.695	-29.4044	-29.2961	-25.8368
299.8	-29.5127	-29.7104	-26.498
299.905	-29.2599	-29.6337	-27.3228
300.01	-28.7119	-29.0018	-28.2056
300.115	-27.9446	-27.9944	-28.9296
300.22	-27.0389	-26.8747	-29.2646
300.325	-26.0831	-25.8283	-29.1951
300.43	-25.1604	-24.9406	-28.9787
300.535	-24.3345	-24.2298	-28.9479
300.64	-23.6419	-23.6761	-29.3835
300.745	-23.0919	-23.2384	-30.5654
300.85	-22.6706	-22.8669	-32.9634
300.955	-22.3467	-22.5167	-37.9382
301.06	-22.0805	-22.1617	-53.288
301.165	-21.8362	-21.8038	-37.4652
301.27	-21.5968	-21.4706	-31.2217
301.375	-21.3723	-21.2041	-27.7016
301.48	-21.1967	-21.0477	-25.4188
301.585	-21.1168	-21.0371	-23.8988
301.69	-21.1794	-21.1965	-22.9242
301.795	-21.4223	-21.5365	-22.3679
301.9	-21.8686	-22.052	-22.1349
302.005	-22.5207	-22.7173	-22.1324
302.11	-23.35	-23.4823	-22.2539
302.215	-24.2823	-24.2718	-22.3793
302.32	-25.1895	-25.0014	-22.4019
302.425	-25.9203	-25.612	-22.2743
302.53	-26.3881	-26.1024	-22.0298
302.635	-26.6407	-26.5235	-21.7528
302.74	-26.8128	-26.931	-21.5294
302.845	-27.0157	-27.3297	-21.4158
302.95	-27.2623	-27.6364	-21.4302
303.055	-27.4446	-27.6941	-21.5545
303.16	-27.3768	-27.3747	-21.7405
303.265	-26.9305	-26.7027	-21.9213
303.37	-26.1601	-25.8393	-22.034
303.475	-25.2457	-24.9562	-22.0474
303.58	-24.35	-24.1568	-21.9761
303.685	-23.5541	-23.4739	-21.8685
303.79	-22.8706	-22.8936	-21.7793
303.895	-22.274	-22.3787	-21.7458
304	-21.729	-21.8898	-21.7785
304.105	-21.2131	-21.4037	-21.8614
304.21	-20.7282	-20.9232	-21.9609
304.315	-20.2997	-20.4749	-22.0398
304.42	-19.9645	-20.0982	-22.0753
304.525	-19.7582	-19.8318	-22.0706
304.63	-19.7049	-19.7052	-22.0538
304.735	-19.8105	-19.733	-22.065
304.84	-20.0575	-19.9119	-22.1408
304.945	-20.399	-20.2155	-22.3048
305.05	-20.7583	-20.5898	-22.5639
305.155	-21.0417	-20.9527	-22.9102
305.26	-21.1754	-21.2107	-23.3265
305.365	-21.1456	-21.2975	-23.7953
305.47	-21.0049	-21.2117	-24.3088
305.575	-20.8369	-21.0164	-24.8754
305.68	-20.7143	-20.8013	-25.5169
305.785	-20.677	-20.6434	-26.2546
305.89	-20.7312	-20.5899	-27.0799
305.995	-20.8577	-20.6573	-27.9073
306.1	-21.0242	-20.8371	-28.5247
306.205	-21.202	-21.102	-28.6376
306.31	-21.3807	-21.4141	-28.1086
306.415	-21.5744	-21.737	-27.119
306.52	-21.816	-22.0492	-25.9705
306.625	-22.1422	-22.3542	-24.8683
306.73	-22.5803	-22.6802	-23.8978
306.835	-23.1373	-23.0698	-23.0749
306.94	-23.7954	-23.5665	-22.3859
307.045	-24.5131	-24.2018	-21.8086
307.15	-25.236	-24.9827	-21.324
307.255	-25.914	-25.8726	-20.921
307.36	-26.5114	-26.7579	-20.5979
307.465	-26.9858	-27.4176	-20.3599
307.57	-27.2384	-27.5771	-20.2164
307.675	-27.0997	-27.1094	-20.177
307.78	-26.4433	-26.1618	-20.2496
307.885	-25.3456	-24.9982	-20.4387
307.99	-24.0473	-23.8189	-20.7449
308.095	-22.7779	-22.7295	-21.1658
308.2	-21.6743	-21.7772	-21.6954
308.305	-20.7951	-20.981	-22.3244
308.41	-20.1537	-20.3475	-23.0364
308.515	-19.7382	-19.8772	-23.8014
308.62	-19.5216	-19.5656	-24.5625
308.725	-19.4658	-19.4041	-25.2218
308.83	-19.5247	-19.3789	-25.645
308.935	-19.6505	-19.4708	-25.713
309.04	-19.8049	-19.6566	-25.4042
309.145	-19.9701	-19.9114	-24.8167
309.25	-20.1557	-20.2142	-24.0987
309.355	-20.3947	-20.5546	-23.3721
309.46	-20.7312	-20.9379	-22.7081
309.565	-21.2085	-21.3866	-22.1361
309.67	-21.8609	-21.9373	-21.6593
309.775	-22.7082	-22.6346	-21.2679
309.88	-23.7517	-23.525	-20.949
309.985	-24.9684	-24.649	-20.6929
310.09	-26.302	-26.0269	-20.498
310.195	-27.6511	-27.6163	-20.3708
310.3	-28.8589	-29.2071	-20.3252
310.405	-29.7118	-30.2882	-20.3787
310.51	-29.9794	-30.3072	-20.5496
310.615	-29.5438	-29.3844	-20.8537
310.72	-28.5261	-28.1	-21.3034
310.825	-27.2089	-26.8263	-21.9062
310.93	-25.8516	-25.6768	-22.6637
311.035	-24.6112	-24.6578	-23.5695
311.14	-23.5589	-23.7533	-24.6036
311.245	-22.7152	-22.9551	-25.7187
311.35	-22.0731	-22.2669	-26.8131
311.455	-21.6115	-21.7004	-27.6962
311.56	-21.3031	-21.2694	-28.1067
311.665	-21.1199	-20.9846	-27.8739
311.77	-21.039	-20.8521	-27.0914
311.875	-21.0474	-20.8723	-26.028
311.98	-21.1457	-21.0411	-24.9218
312.085	-21.3474	-21.3508	-23.9087
312.19	-21.6764	-21.7932	-23.0476
312.295	-22.163	-22.3634	-22.3547
312.4	-22.8409	-23.0653	-21.8251
312.505	-23.7467	-23.9189	-21.4422
312.61	-24.9233	-24.967	-21.1842
312.715	-26.4286	-26.2867	-21.028
312.82	-28.3561	-28.0089	-20.954
312.925	-30.883	-30.3702	-20.9506
313.03	-34.3943	-33.8754	-21.0181
313.135	-39.7403	-39.938	-21.1686
313.24	-43.8136	-46.1653	-21.4247
313.345	-37.7137	-37.3453	-21.8154
313.45	-33.0905	-32.5081	-22.3713
313.555	-29.9886	-29.5337	-23.1197
313.66	-27.7318	-27.4763	-24.077
313.765	-26.0209	-25.9613	-25.2299
313.87	-24.7074	-24.8005	-26.4926
313.975	-23.7049	-23.8857	-27.6255
314.08	-22.955	-23.1526	-28.2033
314.185	-22.4131	-22.5659	-27.8977
314.29	-22.0421	-22.1105	-26.8669
314.395	-21.8122	-21.7852	-25.5314
314.5	-21.7023	-21.5973	-24.183
314.605	-21.7023	-21.5574	-22.9429
314.71	-21.8145	-21.6775	-21.8472
314.815	-22.0536	-21.9689	-20.9019
314.92	-22.445	-22.4432	-20.1055
315.025	-23.0231	-23.1138	-19.4547
315.13	-23.8312	-24.0001	-18.9445
315.235	-24.9257	-25.1354	-18.567
315.34	-26.3877	-26.5812	-18.31
315.445	-28.3516	-28.4571	-18.1566
315.55	-31.0823	-31.0122	-18.085
315.655	-35.2275	-34.8465	-18.0716
315.76	-42.9058	-41.8192	-18.0938
315.865	-43.5912	-44.1936	-18.1354
315.97	-35.5367	-35.699	-18.19
316.075	-31.2163	-31.1445	-18.2617
316.18	-28.3438	-28.1796	-18.3615
316.285	-26.2254	-26.0483	-18.5025
316.39	-24.5868	-24.4459	-18.6931
316.495	-23.2969	-23.2176	-18.9329
316.6	-22.2831	-22.2709	-19.2095
316.705	-21.4991	-21.5432	-19.4997
316.81	-20.9105	-20.989	-19.7728
316.915	-20.4892	-20.5745	-19.9982
317.02	-20.2101	-20.2769	-20.153
317.125	-20.0526	-20.0831	-20.2273
317.23	-20.0015	-19.9899	-20.2224
317.335	-20.0495	-20.0029	-20.1458
317.44	-20.1989	-20.1338	-20.0061
317.545	-20.4607	-20.3982	-19.8123
317.65	-20.8541	-20.8139	-19.5766
317.755	-21.4039	-21.3991	-19.317
317.86	-22.1388	-22.1729	-19.0573
317.965	-23.0913	-23.1561	-18.8237
318.07	-24.2984	-24.374	-18.6399
318.175	-25.8049	-25.8606	-18.5225
318.28	-27.664	-27.6618	-18.4784
318.385	-29.914	-29.8184	-18.5041
318.49	-32.4168	-32.2329	-18.5872
318.595	-34.2221	-34.103	-18.7099
318.7	-33.614	-33.7101	-18.8543
318.805	-31.281	-31.4219	-19.0072
318.91	-28.8359	-28.9207	-19.1634
319.015	-26.7441	-26.7734	-19.3236
319.12	-25.0233	-25.0186	-19.4877
319.225	-23.6231	-23.6032	-19.6467
319.33	-22.4949	-22.4724	-19.7767
319.435	-21.599	-21.5804	-19.8412
319.54	-20.9007	-20.8883	-19.8038
319.645	-20.3683	-20.3621	-19.6479
319.75	-19.9722	-19.9713	-19.3901
319.855	-19.687	-19.6902	-19.074
319.96	-19.4937	-19.4999	-18.7512
320.065	-19.3824	-19.3903	-18.4609
320.17	-19.354	-19.3612	-18.2186
320.275	-19.4187	-19.422	-18.0129
320.38	-19.5939	-19.5893	-17.8106
320.485	-19.8996	-19.884	-17.5686
320.59	-20.3559	-20.3283	-17.2532
320.695	-20.9801	-20.9432	-16.8583
320.8	-21.7849	-21.7473	-16.4101
320.905	-22.7771	-22.7533	-15.9562
321.01	-23.9531	-23.9622	-15.5479
321.115	-25.2887	-25.3466	-15.2263
321.22	-26.7087	-26.8107	-15.0176
321.325	-28.0189	-28.1144	-14.9312
321.43	-28.8333	-28.837	-14.9619
321.535	-28.7362	-28.6326	-15.0905
321.64	-27.7449	-27.6287	-15.2865
321.745	-26.2991	-26.2498	-15.5125
321.85	-24.7917	-24.818	-15.7329
321.955	-23.414	-23.4853	-15.9238
322.06	-22.2315	-22.3095	-16.0818
322.165	-21.2548	-21.3089	-16.2247
322.27	-20.4718	-20.4851	-16.3838
322.375	-19.8613	-19.8318	-16.593
322.48	-19.3983	-19.3373	-16.8794
322.585	-19.0579	-18.9859	-17.2582
322.69	-18.8185	-18.7596	-17.7296
322.795	-18.6652	-18.6399	-18.278
322.9	-18.592	-18.61	-18.8726
323.005	-18.6019	-18.6583	-19.4705
323.11	-18.7053	-18.7814	-20.0243
323.215	-18.9164	-18.9846	-20.4949
323.32	-19.2493	-19.282	-20.8632
323.425	-19.7153	-19.6937	-21.1344
323.53	-20.3201	-20.2423	-21.3311
323.635	-21.0623	-20.9484	-21.4806
323.74	-21.9328	-21.8253	-21.6031
323.845	-22.9133	-22.8695	-21.7045
323.95	-23.9726	-24.0435	-21.7726
324.055	-25.0534	-25.2434	-21.7773
324.16	-26.0437	-26.2655	-21.6752
324.265	-26.743	-26.8342	-21.4239
324.37	-26.9005	-26.7727	-21.0013
324.475	-26.4032	-26.1604	-20.4201
324.58	-25.4126	-25.2293	-19.725
324.685	-24.217	-24.1796	-18.9749
324.79	-23.0364	-23.1276	-18.2239
324.895	-21.9824	-22.1339	-17.5113
325	-21.0943	-21.2334	-16.8593
