# Supplementary material for: 220–325GHz All-Photopolymer Bragg Horn Antennas Towards Eco-Friendly Terahertz Applications
Source: Research Square preprint supplement (doi:10.21203/rs.3.rs-6221054/v1), 2025-04-21
Supplement: Supplementary file 6 [file c87d4ac2ff46543387b718f4.xlsx]

## Sheet: 5
CST XY Data Exchange Format V2
Title = Realized Gain,Phi=0.0,Max. Value (Subrange)
Xlabel = Frequency / THz
Ylabel =
Curvelabel = Realized Gain,Phi=0.0,Max. Value (Subrange)
Filename = ^Realized Gain,Phi=0.0,Max. Value (Subrange).sig
Npoints = 12
Type = 8
Subtype = 7
Result type = real:cartesian
View type = Cartesian
Plot type = Real
Data/Title = Realized Gain,Phi=0.0,Max. Value (Subrange)
X/Label = Frequency
X/Unit = THz
Plot/wrapHeuristics = 0
0.22	25.3061
0.23	25.725
0.24	25.8507
0.25	26.1023
0.26	26.3058
0.27	25.9657
0.2725	26.357
0.28	28.1437
0.29	29.073
0.3	29.481
0.31	29.3943
0.32	28.9818

## Sheet: 10
CST XY Data Exchange Format V2
Title = Realized Gain,Phi=0.0,Max. Value (Subrange)
Xlabel = Frequency / THz
Ylabel =
Curvelabel = Realized Gain,Phi=0.0,Max. Value (Subrange)
Filename = ^Realized Gain,Phi=0.0,Max. Value (Subrange).sig
Npoints = 12
Type = 8
Subtype = 7
Result type = real:cartesian
View type = Cartesian
Plot type = Real
Data/Title = Realized Gain,Phi=0.0,Max. Value (Subrange)
X/Label = Frequency
X/Unit = THz
Plot/wrapHeuristics = 0
0.22	22.0261
0.23	22.4826
0.24	22.7146
0.25	23.9301
0.26	24.8531
0.27	25.1926
0.2725	25.4289
0.28	24.8774
0.29	25.526
0.3	26.2647
0.31	27.3036
0.32	28.5662

## Sheet: 15
CST XY Data Exchange Format V2
Title = Realized Gain,Phi=0.0,Max. Value (Subrange)
Xlabel = Frequency / THz
Ylabel =
Curvelabel = Realized Gain,Phi=0.0,Max. Value (Subrange)
Filename = ^Realized Gain,Phi=0.0,Max. Value (Subrange).sig
Npoints = 12
Type = 8
Subtype = 7
Result type = real:cartesian
View type = Cartesian
Plot type = Real
Data/Title = Realized Gain,Phi=0.0,Max. Value (Subrange)
X/Label = Frequency
X/Unit = THz
Plot/wrapHeuristics = 0
0.22	20.2099
0.23	22.319
0.24	22.6666
0.25	22.6317
0.26	22.0736
0.27	22.0019
0.2725	22.0589
0.28	21.7123
0.29	22.3539
0.3	22.8948
0.31	24.1308
0.32	25.1838
